# Supplementary material
Source: Research Square preprint supplement (doi:10.21203/rs.3.rs-6356438/v1)
Supplement: Supplementary file 2 [file 7fbdc60e350400997df71a73.xlsx]

## Sheet: Fig. 2b
	CDs	Mn@CDs-12.5	Mn@CDs-25	Mn@CDs-50	Mn@CDs-100
Wavelength (nm)	Intensity	Intensity	Intensity	Intensity	Intensity
600	156.64	175.243	53.822	396.263	242.943
600.1	171.079	182.447	57.0934	397.56	238.129
600.2	185.518	189.65	60.3649	398.858	233.314
600.3	199.957	196.854	63.6364	400.155	228.5
600.4	214.396	204.057	66.9079	401.452	223.685
600.5	228.835	211.261	70.1794	402.749	218.87
600.6	243.274	218.464	73.4509	404.046	214.056
600.7	257.714	225.668	76.7223	405.343	209.241
600.8	272.153	232.871	79.9938	406.64	204.427
600.9	286.592	240.075	83.2653	407.937	199.612
601	301.031	247.278	86.5368	409.235	194.798
601.1	315.47	254.482	89.8083	410.532	189.983
601.2	329.909	261.685	93.0797	411.829	185.168
601.3	344.348	268.889	96.3512	413.126	180.354
601.4	358.787	276.093	99.6227	414.423	175.539
601.5	373.226	283.296	102.894	415.72	170.725
601.6	387.666	290.5	106.166	417.017	165.91
601.7	402.105	297.703	109.437	418.314	161.096
601.8	416.544	304.907	112.709	419.612	156.281
601.9	430.983	312.11	115.98	420.909	151.466
602	445.422	319.314	119.252	422.206	146.652
602.1	456.667	324.488	123.025	421.751	144.496
602.2	467.57	329.315	127.624	420.841	141.93
602.3	478.057	333.766	133.078	419.485	138.949
602.4	488.056	337.837	139.413	417.687	135.595
602.5	497.537	341.532	146.579	415.484	131.894
602.6	506.436	344.818	154.592	412.893	127.852
602.7	514.747	347.702	163.454	409.941	123.524
602.8	522.466	350.195	173.113	406.692	118.956
602.9	529.58	352.294	183.512	403.204	114.185
603	536.066	353.982	194.606	399.519	109.238
603.1	541.88	355.225	206.336	395.662	104.147
603.2	547.045	356.021	218.681	391.683	98.9427
603.3	551.576	356.355	231.546	387.619	93.6485
603.4	555.451	356.178	244.866	383.504	88.2932
603.5	558.683	355.491	258.598	379.378	82.9152
603.6	561.28	354.307	272.721	375.276	77.5544
603.7	563.215	352.634	287.214	371.241	72.2573
603.8	564.459	350.506	302.004	367.285	67.0741
603.9	564.954	347.927	317.027	363.385	62.0934
604	564.725	344.965	332.255	359.548	57.3892
604.1	563.791	341.685	347.625	355.773	53.0153
604.2	562.171	338.145	363.095	352.062	49.0252
604.3	559.864	334.404	378.63	348.423	45.4834
604.4	556.85	330.532	394.186	344.866	42.4601
604.5	553.132	326.624	409.721	341.409	39.9892
604.6	548.737	322.742	425.16	338.043	38.0811
604.7	543.669	318.944	440.445	334.759	36.774
604.8	537.975	315.29	455.533	331.574	36.0537
604.9	531.706	311.828	470.396	328.503	35.8863
605	524.916	308.588	485.011	325.572	36.2356
605.1	517.637	305.598	499.338	322.826	37.0808
605.2	509.896	302.903	513.332	320.314	38.433
605.3	501.722	300.564	526.977	318.055	40.2592
605.4	493.178	298.588	540.234	316.07	42.5309
605.5	484.326	296.995	553.081	314.383	45.226
605.6	475.229	295.807	565.489	313.039	48.3359
605.7	465.953	295.039	577.42	312.085	51.8651
605.8	456.541	294.699	588.864	311.549	55.8384
605.9	447.083	294.786	599.802	311.471	60.2245
606	437.646	295.302	610.132	311.914	65.02
606.1	428.252	296.247	619.823	312.879	70.2109
606.2	418.95	297.576	628.829	314.364	75.7363
606.3	409.785	299.235	637.108	316.375	81.5425
606.4	400.798	301.183	644.621	318.934	87.5989
606.5	392.045	303.382	651.322	322.077	93.8708
606.6	383.543	305.763	657.208	325.829	100.332
606.7	375.319	308.296	662.235	330.177	106.939
606.8	367.391	310.955	666.319	335.125	113.644
606.9	359.768	313.705	669.44	340.641	120.412
607	352.472	316.517	671.592	346.702	127.211
607.1	345.535	319.385	672.745	353.301	134.013
607.2	338.965	322.308	672.927	360.397	140.801
607.3	332.802	325.333	672.1	367.965	147.58
607.4	327.069	328.48	670.264	376.013	154.337
607.5	321.767	331.788	667.43	384.486	161.037
607.6	316.904	335.294	663.607	393.324	167.643
607.7	312.489	339.026	658.792	402.475	174.11
607.8	308.531	343.008	652.982	411.875	180.395
607.9	305.055	347.268	646.219	421.51	186.445
608	302.032	351.814	638.618	431.303	192.231
608.1	299.491	356.679	630.219	441.223	197.721
608.2	297.437	361.885	621.062	451.259	202.867
608.3	295.85	367.439	611.198	461.38	207.634
608.4	294.708	373.329	600.695	471.558	211.99
608.5	294.021	379.551	589.614	481.781	215.894
608.6	293.82	386.06	578.027	492.055	219.32
608.7	294.111	392.874	565.999	502.453	222.279
608.8	294.894	399.958	553.628	512.999	224.784
608.9	296.194	407.287	540.973	523.714	226.829
609	298.011	414.856	528.068	534.614	228.429
609.1	300.325	422.676	514.942	545.705	229.606
609.2	303.119	430.778	501.65	556.992	230.36
609.3	306.391	439.114	488.281	568.445	230.71
609.4	310.177	447.649	474.919	580.037	230.638
609.5	314.454	456.407	461.611	591.763	230.155
609.6	319.209	465.371	448.408	603.578	229.266
609.7	324.426	474.518	435.345	615.433	227.962
609.8	330.092	483.834	422.453	627.273	226.221
609.9	336.203	493.299	409.784	639.026	224.022
610	342.731	502.926	397.414	650.614	221.414
610.1	349.641	512.654	385.397	661.992	218.413
610.2	356.944	522.425	373.775	673.088	215.014
610.3	364.652	532.214	362.576	683.834	211.259
610.4	372.762	541.995	351.801	694.16	207.197
610.5	381.248	551.749	341.432	703.998	202.867
610.6	390.089	561.468	331.463	713.254	198.301
610.7	399.262	571.146	321.921	721.797	193.532
610.8	408.781	580.757	312.861	729.514	188.622
610.9	418.629	590.257	304.323	736.349	183.622
611	428.795	599.619	296.332	742.241	178.56
611.1	439.271	608.823	288.927	747.109	173.452
611.2	450.039	617.84	282.164	750.859	168.313
611.3	461.132	626.604	276.089	753.406	163.165
611.4	472.474	635.071	270.745	754.79	158.01
611.5	484.022	643.177	266.245	754.986	152.867
611.6	495.805	650.819	262.659	753.993	147.752
611.7	507.819	657.905	260.02	751.877	142.701
611.8	520.027	664.375	258.344	748.727	137.755
611.9	532.411	670.18	257.651	744.614	132.951
612	544.925	675.272	257.979	739.602	128.329
612.1	557.596	679.566	259.306	733.794	123.916
612.2	570.375	683.082	261.614	727.311	119.739
612.3	583.227	685.802	264.917	720.254	115.84
612.4	596.162	687.727	269.196	712.741	112.247
612.5	609.215	688.873	274.413	704.885	108.984
612.6	622.417	689.235	280.553	696.777	106.085
612.7	635.721	688.901	287.53	688.524	103.564
612.8	649.104	687.916	295.338	680.197	101.413
612.9	662.578	686.341	303.931	671.911	99.6064
613	676.126	684.223	313.258	663.746	98.1214
613.1	689.731	681.598	323.263	655.772	96.9372
613.2	703.382	678.492	333.886	648.079	96.0346
613.3	717.068	674.904	345.041	640.73	95.3959
613.4	730.774	670.94	356.624	633.854	94.9705
613.5	744.437	666.635	368.543	627.465	94.7442
613.6	758	662.015	380.733	621.599	94.6953
613.7	771.431	657.154	393.13	616.348	94.7986
613.8	784.716	652.117	405.666	611.756	95.0399
613.9	797.843	646.929	418.268	607.799	95.4124
614	810.799	641.63	430.867	604.502	95.8937
614.1	823.536	636.261	443.362	601.901	96.4551
614.2	836.055	630.935	455.743	600.031	97.0503
614.3	848.309	625.697	468.001	598.864	97.6634
614.4	860.248	620.577	480.128	598.399	98.2872
614.5	871.842	615.611	492.125	598.643	98.9041
614.6	883.08	610.823	503.999	599.588	99.4872
614.7	893.944	606.218	515.758	601.244	100.023
614.8	904.391	601.763	527.418	603.563	100.495
614.9	914.323	597.486	538.977	606.597	100.872
615	923.68	593.452	550.489	610.339	101.126
615.1	932.415	589.701	562.005	614.758	101.246
615.2	940.494	586.266	573.55	619.839	101.246
615.3	947.881	583.183	585.129	625.576	101.144
615.4	954.528	580.514	596.692	632.002	100.935
615.5	960.433	578.316	608.276	639.026	100.622
615.6	965.588	576.655	619.849	646.611	100.212
615.7	969.938	575.645	631.385	654.782	99.7217
615.8	973.461	575.401	642.889	663.509	99.1661
615.9	976.191	576.011	654.372	672.727	98.566
616	978.188	577.523	665.787	682.388	97.9534
616.1	979.507	579.969	677.106	692.431	97.3619
616.2	980.151	583.442	688.26	702.836	96.8173
616.3	980.125	587.945	699.294	713.541	96.3231
616.4	979.458	593.48	710.216	724.523	95.8867
616.5	978.184	600.05	721.018	735.764	95.5183
616.6	976.324	607.678	731.685	747.25	95.238
616.7	973.891	616.397	742.173	758.954	95.0757
616.8	970.993	626.209	752.517	770.844	95.0633
616.9	967.682	637.002	762.674	782.837	95.1958
617	963.983	648.73	772.603	794.867	95.4931
617.1	959.936	661.386	782.308	806.936	95.9962
617.2	955.592	674.943	791.792	819.057	96.734
617.3	951.024	689.333	801.038	831.174	97.7161
617.4	946.337	704.537	810.017	843.246	98.9729
617.5	941.641	720.451	818.686	855.188	100.539
617.6	937.07	737.084	827.02	867.042	102.446
617.7	932.715	754.329	835.019	878.761	104.659
617.8	928.641	772.102	842.695	890.288	107.159
617.9	924.919	790.362	850.074	901.62	109.936
618	921.636	809.099	857.195	912.809	112.97
618.1	918.938	828.34	864.091	923.89	116.252
618.2	916.922	847.996	870.801	934.76	119.734
618.3	915.67	868.007	877.338	945.357	123.399
618.4	915.294	888.372	883.726	955.719	127.236
618.5	915.841	909.071	889.999	965.857	131.22
618.6	917.319	930.073	896.189	975.781	135.331
618.7	919.789	951.369	902.329	985.519	139.569
618.8	923.351	972.981	908.412	995.077	143.954
618.9	928.178	994.99	914.454	1004.52	148.507
619	934.28	1017.35	920.44	1013.8	153.24
619.1	941.704	1039.99	926.34	1022.94	158.161
619.2	950.527	1062.9	932.138	1031.98	163.276
619.3	960.787	1086.04	937.843	1040.98	168.582
619.4	972.425	1109.37	943.454	1050	174.069
619.5	985.461	1132.89	949.026	1059.09	179.73
619.6	999.923	1156.56	954.555	1068.28	185.554
619.7	1015.85	1180.39	960.092	1077.55	191.51
619.8	1033.16	1204.31	965.66	1086.89	197.561
619.9	1051.78	1228.25	971.263	1096.31	203.673
620	1071.62	1252.15	976.925	1105.84	209.801
620.1	1092.57	1276.02	982.724	1115.57	215.898
620.2	1114.59	1299.89	988.758	1125.5	221.963
620.3	1137.54	1323.77	995.02	1135.63	227.981
620.4	1161.4	1347.63	1001.47	1145.91	233.957
620.5	1186.13	1371.53	1008.13	1156.28	239.917
620.6	1211.62	1395.5	1015.01	1166.69	245.885
620.7	1237.75	1419.52	1022.11	1177.11	251.86
620.8	1264.42	1443.61	1029.49	1187.52	257.831
620.9	1291.52	1467.82	1037.21	1197.88	263.745
621	1319	1492.34	1045.4	1208.18	269.621
621.1	1346.78	1517.24	1054.09	1218.32	275.434
621.2	1374.79	1542.54	1063.33	1228.22	281.131
621.3	1402.96	1568.32	1073.18	1237.79	286.67
621.4	1431.19	1594.73	1083.73	1247.04	292.027
621.5	1459.38	1621.97	1095.16	1255.95	297.165
621.6	1487.44	1650.06	1107.51	1264.5	302.027
621.7	1515.26	1679.07	1120.88	1272.66	306.564
621.8	1542.84	1709.23	1135.36	1280.43	310.81
621.9	1570.14	1740.62	1150.93	1287.78	314.803
622	1597.13	1773.23	1167.56	1294.72	318.571
622.1	1623.77	1807.08	1185.22	1301.28	322.141
622.2	1650	1842.16	1203.94	1307.49	325.537
622.3	1675.86	1878.71	1223.8	1313.56	328.802
622.4	1701.34	1916.62	1244.76	1319.56	331.955
622.5	1726.39	1955.85	1266.79	1325.56	335
622.6	1751.07	1996.48	1289.9	1331.69	337.949
622.7	1775.47	2038.55	1314.11	1338.09	340.807
622.8	1799.56	2081.92	1339.33	1344.84	343.57
622.9	1823.33	2126.54	1365.61	1352.12	346.199
623	1846.69	2172.35	1392.96	1360.09	348.651
623.1	1869.78	2219.47	1421.46	1368.93	350.918
623.2	1892.65	2267.85	1451.07	1378.75	353.006
623.3	1915.25	2317.45	1481.72	1389.59	354.94
623.4	1937.63	2368.26	1513.36	1401.55	356.745
623.5	1959.91	2420.3	1545.97	1414.72	358.448
623.6	1982.25	2473.74	1579.62	1429.31	360.048
623.7	2004.63	2528.45	1614.16	1445.32	361.579
623.8	2027.09	2584.38	1649.5	1462.77	363.083
623.9	2049.81	2641.63	1685.67	1481.78	364.618
624	2072.95	2700.26	1722.61	1502.38	366.243
624.1	2096.5	2760.19	1760.21	1524.46	368.013
624.2	2120.56	2821.46	1798.4	1547.97	369.979
624.3	2145.15	2884.03	1837.1	1572.91	372.156
624.4	2170.48	2948.04	1876.43	1599.32	374.579
624.5	2196.54	3013.38	1916.34	1627.08	377.259
624.6	2223.33	3079.94	1956.75	1656.08	380.224
624.7	2250.9	3147.73	1997.7	1686.25	383.534
624.8	2279.37	3216.84	2039.23	1717.56	387.266
624.9	2308.68	3287.14	2081.23	1749.81	391.407
625	2338.91	3358.55	2123.68	1782.88	396.036
625.1	2370.09	3430.94	2166.52	1816.64	401.176
625.2	2402.36	3504.35	2209.84	1851.09	406.918
625.3	2435.76	3578.73	2253.65	1886.14	413.317
625.4	2470.29	3653.92	2297.91	1921.66	420.404
625.5	2506.01	3729.82	2342.64	1957.6	428.24
625.6	2542.96	3806.23	2387.83	1993.93	436.866
625.7	2581.27	3883.4	2433.76	2030.7	446.37
625.8	2620.87	3961.1	2480.42	2067.85	456.702
625.9	2661.73	4039.12	2527.87	2105.34	467.857
626	2703.88	4117.47	2576.3	2143.22	479.881
626.1	2747.3	4196.23	2625.99	2181.48	492.822
626.2	2791.87	4275.27	2676.92	2220.09	506.636
626.3	2837.51	4354.59	2729.22	2259.06	521.307
626.4	2884.15	4434.09	2782.93	2298.38	536.805
626.5	2931.84	4514.14	2838.33	2338.11	553.139
626.6	2980.55	4594.83	2895.49	2378.24	570.248
626.7	3030.21	4676.13	2954.34	2418.7	588.095
626.8	3080.84	4758.13	3014.91	2459.43	606.681
626.9	3132.49	4841.15	3077.33	2500.47	625.99
627	3185.38	4925.69	3141.95	2541.95	646.092
627.1	3239.39	5011.79	3208.56	2583.78	666.892
627.2	3294.47	5099.5	3277.13	2625.96	688.365
627.3	3350.72	5189.17	3347.92	2668.59	710.52
627.4	3408.17	5281.04	3421.04	2711.74	733.351
627.5	3466.66	5375.04	3496.36	2755.32	756.827
627.6	3526.12	5471.32	3573.93	2799.36	780.974
627.7	3586.37	5569.84	3653.61	2843.76	805.833
627.8	3647.55	5671.1	3735.76	2888.83	831.423
627.9	3709.47	5775.05	3820.22	2934.59	857.666
628	3771.93	5881.58	3906.82	2980.97	884.482
628.1	3834.89	5990.86	3995.61	3028.07	911.817
628.2	3898.47	6103.2	4086.74	3076.12	939.639
628.3	3962.48	6218.33	4179.89	3125.03	967.854
628.4	4026.9	6336.34	4274.98	3174.88	996.39
628.5	4091.66	6457.18	4371.83	3225.74	1025.17
628.6	4156.87	6581.22	4470.63	3278	1054.16
628.7	4222.55	6708.52	4571.34	3331.85	1083.27
628.8	4288.54	6838.86	4673.79	3387.29	1112.39
628.9	4354.76	6972.13	4777.93	3444.4	1141.45
629	4421.27	7108.34	4883.82	3503.42	1170.51
629.1	4488.13	7247.88	4991.64	3564.83	1199.6
629.2	4555.15	7390.48	5101.15	3628.63	1228.67
629.3	4622.18	7535.98	5212.21	3694.92	1257.64
629.4	4689.22	7684.6	5324.93	3763.99	1286.51
629.5	4756.27	7836.58	5439.42	3836.13	1315.32
629.6	4823.22	7991.63	5555.49	3911.17	1344
629.7	4890.03	8149.86	5673.13	3989.14	1372.6
629.8	4956.66	8311.2	5792.19	4070.06	1401.1
629.9	5023.3	8476.34	5912.96	4154.27	1429.67
630	5089.99	8645.42	6035.42	4241.78	1458.34
630.1	5156.67	8818.38	6159.45	4332.52	1487.07
630.2	5223.4	8995.46	6285.12	4426.6	1515.88
630.3	5290.42	9177.4	6412.94	4524.36	1544.99
630.4	5357.64	9363.82	6542.66	4625.49	1574.42
630.5	5425.1	9554.88	6674.3	4730	1604.35
630.6	5492.7	9750.51	6807.76	4837.88	1634.87
630.7	5560.51	9951.17	6943.34	4949.39	1666.19
630.8	5628.53	10157.1	7081.21	5064.65	1698.43
630.9	5696.56	10367.8	7221.14	5183.44	1731.55
631	5764.47	10583.3	7363.14	5305.68	1765.62
631.1	5832.08	10803.1	7506.95	5431.16	1800.66
631.2	5899.61	11027.8	7653.25	5560.17	1836.94
631.3	5967.02	11257.2	7801.84	5692.41	1874.44
631.4	6034.23	11490.7	7952.48	5827.66	1913.07
631.5	6101.32	11728.5	8105.41	5966.01	1952.85
631.6	6168.6	11971	8261.18	6107.76	1993.82
631.7	6236.03	12217.6	8419.53	6252.55	2035.8
631.8	6303.67	12468.1	8580.65	6400.32	2078.79
631.9	6371.55	12722	8744.42	6550.9	2122.73
632	6440.03	12979.9	8911.47	6704.63	2167.78
632.1	6509.27	13241.8	9081.93	6861.58	2213.95
632.2	6579.19	13507.2	9255.53	7021.5	2261.11
632.3	6649.78	13775.6	9432.26	7184.33	2309.23
632.4	6721.2	14047.5	9612.57	7350.24	2358.32
632.5	6793.74	14323.1	9797.22	7519.67	2408.49
632.6	6867.3	14601.9	9985.97	7692.16	2459.64
632.7	6941.84	14883.7	10178.7	7867.38	2511.75
632.8	7017.62	15168.6	10375.8	8045.5	2564.85
632.9	7094.97	15457.3	10577.9	8226.75	2618.94
633	7173.83	15749.3	10784.6	8410.76	2673.88
633.1	7254.35	16044.7	10996.2	8597.48	2729.61
633.2	7336.61	16343.1	11212.7	8786.57	2786.05
633.3	7421.1	16645.4	11435	8978.51	2843.39
633.4	7507.92	16951.6	11662.9	9173.11	2901.65
633.5	7597.03	17261.2	11896.3	9369.97	2960.8
633.6	7688.59	17574.4	12135.1	9569.04	3020.88
633.7	7782.96	17891.9	12380	9770.84	3082.04
633.8	7879.88	18212.9	12630.5	9974.88	3144.15
633.9	7979.32	18537.2	12886.5	10181	3207.23
634	8081.16	18864.4	13147.7	10388.9	3271.26
634.1	8185.57	19194.7	13414.6	10598.5	3336.36
634.2	8292.63	19528.3	13687.3	10810	3402.57
634.3	8402.06	19864.3	13965.2	11022.7	3469.71
634.4	8513.71	20202.2	14247.7	11236.2	3537.61
634.5	8627.7	20542.2	14535.3	11450.6	3606.2
634.6	8744.27	20884.9	14828.5	11666.1	3675.5
634.7	8863.32	21229.7	15126.9	11882.2	3745.39
634.8	8984.76	21576.1	15430	12098.5	3815.7
634.9	9108.81	21924	15737.8	12314.9	3886.5
635	9235.89	22274.2	16050.7	12531.7	3957.95
635.1	9365.77	22626.1	16368	12748.5	4029.9
635.2	9498.49	22979.7	16689.4	12965.2	4102.32
635.3	9633.92	23334.4	17014.2	13181.4	4175.1
635.4	9772.43	23691.1	17343.1	13397.4	4248.46
635.5	9914.05	24049.7	17675.7	13613.3	4322.51
635.6	10058.5	24409.8	18011.3	13828.5	4397.18
635.7	10205.7	24770.8	18349.2	14042.7	4472.49
635.8	10355.7	25133.6	18689.6	14256.1	4548.57
635.9	10508.9	25498.9	19032.9	14468.9	4625.59
636	10665	25866.3	19378.5	14680.7	4703.37
636.1	10823.7	26235.4	19725.7	14891.1	4781.79
636.2	10985.2	26606.9	20074.8	15100.1	4860.98
636.3	11149.8	26981.6	20426.3	15308.2	4941.16
636.4	11317.1	27359.3	20779.3	15514.8	5022.26
636.5	11487	27740.1	21133.8	15720.2	5104.31
636.6	11659.4	28124	21489.1	15923.9	5187.26
636.7	11834.5	28512.3	21845.8	16126.6	5271.34
636.8	12012.2	28905.2	22203.9	16328.3	5356.52
636.9	12191.9	29302.1	22562.7	16528.9	5442.67
637	12373.4	29703.3	22921.7	16728.3	5529.83
637.1	12557.1	30110.3	23281.8	16927.4	5618.22
637.2	12742.3	30522.2	23642	17125.9	5707.61
637.3	12928.6	30939.1	24002.1	17324	5797.88
637.4	13115.8	31360.7	24361.6	17521.6	5888.81
637.5	13303.8	31788.1	24721.1	17719.2	5980.37
637.6	13492.7	32221.8	25080.8	17917.3	6072.52
637.7	13682.1	32661.2	25440.3	18115.8	6165.01
637.8	13871.8	33105.9	25799	18314.4	6257.68
637.9	14061.9	33557	26157.6	18514.2	6350.57
638	14252.7	34015.9	26516.7	18715.9	6443.72
638.1	14444.1	34482.3	26875.9	18919.7	6536.91
638.2	14635.8	34955.5	27234.7	19125.4	6629.92
638.3	14827.8	35436.2	27593.2	19333.6	6722.73
638.4	15020.8	35925.7	27952.2	19545.3	6815.53
638.5	15214.3	36423.2	28311.3	19760.2	6908.16
638.6	15408.3	36928.5	28670.3	19978.8	7000.72
638.7	15602.5	37441.2	29028.7	20200.9	7093.03
638.8	15797.3	37962.4	29387.6	20427.5	7185.25
638.9	15992.8	38492	29747.4	20658.8	7277.37
639	16188.5	39029	30107.7	20894.4	7369.25
639.1	16384.2	39572.9	30468.5	21134.3	7460.8
639.2	16580.6	40125.7	30831.7	21379.5	7552.41
639.3	16777.3	40685.7	31196.8	21629.5	7643.93
639.4	16974.2	41252.9	31564.1	21884.4	7735.4
639.5	17171	41826.5	31933.4	22144.1	7826.7
639.6	17367.7	42407	32305.7	22408.8	7917.9
639.7	17564.6	42994.8	32682	22679.1	8009.14
639.8	17761.5	43588.7	33061.9	22954.3	8100.28
639.9	17958	44188.5	33445.7	23234.6	8191.37
640	18153.8	44792.8	33832.9	23519.8	8282.31
640.1	18349.3	45402.8	34225	23810.7	8373.5
640.2	18544.2	46017.6	34622	24107.1	8464.99
640.3	18738	46635.9	35023.2	24408.6	8556.64
640.4	18930.6	47257	35429	24715.1	8648.43
640.5	19122.6	47881.8	35840.8	25027.4	8740.72
640.6	19313.4	48508.8	36257.7	25344.6	8833.32
640.7	19503.1	49137.6	36679.5	25666.7	8926.31
640.8	19691.6	49767.1	37105.8	25993.4	9019.63
640.9	19879.1	50397.9	37537.4	26325.3	9113.56
641	20066.1	51030.4	37974.6	26662.5	9208.26
641.1	20252.6	51663.4	38416.6	27004.3	9303.51
641.2	20438.4	52295.9	38863	27350.3	9399.18
641.3	20624.3	52928.9	39314.3	27700.7	9495.52
641.4	20810.8	53563.3	39771.5	28056.2	9592.87
641.5	20998	54198.4	40233.7	28416.3	9691.22
641.6	21185.9	54832.9	40700.1	28780.3	9790.52
641.7	21374.7	55466.9	41171.1	29148.4	9890.97
641.8	21565.1	56101.7	41647.4	29520.9	9992.93
641.9	21757.1	56735.9	42128.2	29896.9	10096.2
642	21950.6	57369.3	42613.4	30275.8	10200.9
642.1	22145.8	58000.9	43102.4	30656.9	10306.8
642.2	22343.1	58631.8	43595.9	31040.7	10414.4
642.3	22542.8	59262.6	44094.1	31427.1	10523.7
642.4	22744.4	59891.9	44596	31815.1	10634.4
642.5	22947.9	60519.3	45101.2	32203.9	10746.4
642.6	23154.1	61147.3	45611.4	32594.6	10860.1
642.7	23362.4	61774.8	46125.2	32986.1	10974.8
642.8	23572.8	62402	46642.3	33378	11090.5
642.9	23785.1	63028.4	47162.1	33769.8	11207
643	23999.2	63655	47684.9	34161.8	11324.3
643.1	24215.6	64283.3	48211.2	34554.4	11442.4
643.2	24433.7	64912	48740.1	34946.8	11561
643.3	24652.9	65540.1	49270.5	35338	11679.8
643.4	24873.4	66169	49803.1	35728.9	11798.8
643.5	25095.7	66800	50338.6	36119.5	11918
643.6	25319.3	67432.8	50876.1	36509.6	12037.3
643.7	25543.7	68066.1	51414.6	36898.5	12156.6
643.8	25769	68700.3	51953.3	37286.1	12275.7
643.9	25995.7	69337.4	52493.6	37673.4	12394.8
644	26223.1	69976.2	53034.1	38059.4	12513.5
644.1	26451.5	70616.9	53574.3	38444.1	12631.7
644.2	26680.4	71258.7	54112.9	38826.7	12749.1
644.3	26910.3	71902.8	54650.3	39207.8	12865.7
644.4	27141.7	72550.1	55186.6	39587.6	12981.6
644.5	27374.1	73199.4	55720.8	39965.8	13096.5
644.6	27607.5	73849.8	56251.5	40341.5	13210.4
644.7	27842.6	74503.3	56780.7	40715.8	13323.5
644.8	28079.2	75158.4	57307.4	41087.8	13435.5
644.9	28317.2	75814.3	57831.2	41457	13546.4
645	28556.3	76469.9	58351.5	41822.9	13656.1
645.1	28796.8	77124.7	58868.2	42185.2	13764.6
645.2	29038.9	77779.3	59382.3	42544.2	13872.3
645.3	29282.1	78432.4	59893.1	42899.3	13979
645.4	29526.4	79083.2	60400.6	43250.1	14084.6
645.5	29771.2	79729.9	60903.8	43595.5	14189
645.6	30016.7	80373.4	61403.7	43935.8	14292.1
645.7	30262.8	81013.2	61900.6	44271.1	14394.1
645.8	30508.9	81648	62393.5	44600.8	14494.6
645.9	30754.5	82276.9	62881.8	44924.5	14593.4
646	31000.1	82901.1	63367.2	45243.3	14691.1
646.1	31244.9	83519.6	63848.6	45557	14787.3
646.2	31488.5	84131.9	64326	45865.7	14882.2
646.3	31730.3	84736.6	64798.4	46168.8	14975.5
646.4	31970.2	85333.9	65266	46466.7	15067.4
646.5	32208.5	85924.1	65729.4	46760.3	15158.3
646.6	32444.5	86506.2	66187.6	47049.5	15248.3
646.7	32677.6	87078.5	66639.3	47334	15337.1
646.8	32908.1	87642.2	67085.1	47614.6	15425.5
646.9	33135.9	88197.7	67525.1	47892	15513.8
647	33360.9	88744.7	67958.5	48166	15602.1
647.1	33582.5	89282.1	68384	48436.4	15690.4
647.2	33800.5	89809.6	68800.5	48703.4	15778.9
647.3	34015.3	90329	69208.5	48968.3	15867.9
647.4	34226.4	90839.5	69606.8	49230.8	15957.5
647.5	34434	91341.5	69994.9	49491.1	16047.6
647.6	34637.5	91833.9	70371.4	49748.8	16138.1
647.7	34837	92317.8	70735.9	50004.6	16229.2
647.8	35032.9	92793.7	71088.6	50258.7	16320.9
647.9	35224.9	93260.9	71428.8	50510.6	16413.3
648	35412.8	93718.1	71755.4	50760.1	16506
648.1	35597.4	94167.2	72068.8	51008	16599.5
648.2	35778.6	94607.6	72369.1	51253.8	16693.7
648.3	35956.4	95039.2	72656.3	51497.1	16788.3
648.4	36130.6	95461	72929.9	51737.4	16883.3
648.5	36301.2	95873	73189.6	51974.1	16978.4
648.6	36468.7	96276.3	73435.8	52207.5	17073.7
648.7	36632.9	96670.2	73669	52437.2	17168.6
648.8	36793.4	97053.6	73888.4	52662.1	17262.7
648.9	36950.5	97427.8	74095.1	52882.8	17355.5
649	37104.5	97793.4	74289.7	53099.3	17446.9
649.1	37255.2	98150.6	74472.7	53311.3	17536.2
649.2	37402.6	98499	74644.3	53518.4	17622.9
649.3	37546.3	98837.9	74804.7	53720.4	17706.6
649.4	37687.3	99168.4	74954.7	53917.7	17786.9
649.5	37825.4	99490.3	75095	54110.2	17863.5
649.6	37960.9	99803.4	75226	54298	17936.2
649.7	38093.7	100107	75347.6	54480.7	18004.5
649.8	38224.4	100402	75460.4	54658.4	18068.3
649.9	38353.5	100687	75565.2	54831.1	18127.3
650	38481	100964	75662.2	54998.8	18181.6
650.1	38606.8	101231	75750.8	55160.9	18230.8
650.2	38732	101488	75832.5	55317.6	18274.7
650.3	38856.6	101736	75907.4	55468.9	18313.4
650.4	38980.5	101975	75975.8	55614.4	18346.8
650.5	39104	102205	76037.9	55754.1	18374.7
650.6	39227	102425	76093.7	55887.4	18397
650.7	39350.1	102637	76144	56014.7	18413.8
650.8	39473.1	102840	76188.8	56135.6	18425.5
650.9	39596.4	103034	76228.3	56250.2	18432.1
651	39720.1	103218	76262.3	56358.1	18433.6
651.1	39844.7	103393	76291.2	56459	18430.3
651.2	39970.6	103558	76315.2	56552.9	18422.5
651.3	40097.7	103714	76334.6	56639.4	18410.6
651.4	40226.1	103859	76349.2	56717.8	18394.7
651.5	40356.6	103994	76359.4	56788.2	18375.7
651.6	40488.9	104117	76365.1	56850.5	18354
651.7	40623.1	104230	76366.6	56904.3	18329.9
651.8	40759.1	104331	76364.2	56949.3	18303.5
651.9	40897	104419	76358.4	56985.1	18275.2
652	41036.9	104496	76349.3	57011.6	18245.4
652.1	41178.3	104561	76337.3	57029.2	18214.3
652.2	41320.8	104614	76323.1	57037.3	18181.9
652.3	41464.6	104655	76306.7	57036.7	18148.7
652.4	41609.5	104684	76288.4	57027.5	18115.1
652.5	41755.7	104701	76268.2	57010	18081.2
652.6	41902.7	104706	76246.7	56984.5	18047.2
652.7	42050.4	104698	76224	56951.2	18013.3
652.8	42199.2	104678	76199.6	56910.4	17980
652.9	42348.5	104646	76173.4	56863	17947.7
653	42498.1	104602	76145.1	56809.2	17916.6
653.1	42647.8	104546	76114.5	56749.5	17887.1
653.2	42797.6	104478	76081.1	56684	17859.4
653.3	42947.4	104397	76044.1	56613.1	17833.9
653.4	43096.7	104304	76003.6	56537.5	17810.5
653.5	43245.2	104201	75959.2	56457.3	17789.5
653.6	43392.8	104087	75910.2	56372.8	17771
653.7	43539.2	103963	75856.4	56284.4	17754.8
653.8	43684.3	103829	75797.4	56192.3	17741.2
653.9	43827.8	103687	75732.9	56096.9	17730
654	43969.4	103536	75662.4	55998.2	17721.2
654.1	44109.4	103378	75585.3	55896.3	17714.7
654.2	44247.4	103212	75501.6	55791.5	17710.4
654.3	44383.1	103040	75410.6	55684.3	17708.4
654.4	44516.7	102861	75312.1	55574.6	17708.4
654.5	44648.4	102677	75205.5	55462.5	17710.2
654.6	44778.3	102486	75090.5	55348	17713.7
654.7	44906	102290	74967.2	55231.3	17718.8
654.8	45031.6	102088	74835.4	55112.4	17725.3
654.9	45155.4	101881	74695	54990.9	17732.5
655	45277.3	101669	74546.7	54867.2	17740.3
655.1	45397.2	101452	74390.8	54741	17748.2
655.2	45515.1	101231	74227.6	54612.7	17756.2
655.3	45631	101006	74057.7	54482	17763.6
655.4	45745.5	100776	73881.5	54348.8	17770
655.5	45858.3	100543	73699.9	54213.2	17775.2
655.6	45969.3	100306	73513.7	54075.5	17778.6
655.7	46079	100066	73323.9	53935.8	17780
655.8	46187.6	99823.1	73130.5	53794	17779
655.9	46295.3	99576.8	72934	53650.4	17775.5
656	46402	99327.9	72735.1	53505.5	17769.4
656.1	46507.7	99076.5	72534.1	53359.9	17760.5
656.2	46613.2	98822.1	72331	53213.1	17748.7
656.3	46718.3	98565.6	72126.3	53065.9	17734.1
656.4	46823.1	98306.8	71920.1	52918.6	17716.6
656.5	46927.5	98046.3	71712.8	52771.5	17696
656.6	47031.7	97784.2	71504.2	52624.7	17672.3
656.7	47136.2	97520.3	71294.1	52478	17645.7
656.8	47240.9	97255.3	71082.8	52331.5	17616.3
656.9	47345.8	96989.9	70870.8	52185.8	17583.9
657	47451.5	96723.4	70657.6	52039.9	17549
657.1	47558.3	96456.5	70443.5	51893.9	17511.5
657.2	47666	96189.5	70228.6	51747.6	17471.8
657.3	47774.9	95923	70013	51601	17429.8
657.4	47885.1	95657.1	69796.6	51453.6	17385.9
657.5	47997.1	95391.1	69578.5	51304.9	17340.4
657.6	48110.8	95125.4	69359	51154.8	17293.4
657.7	48226.1	94860.7	69138.3	51003.3	17245.2
657.8	48343.3	94596.2	68915.8	50850.2	17196
657.9	48462.6	94331.4	68690.9	50694.7	17145.9
658	48584.1	94065.8	68463.2	50536.6	17094.9
658.1	48707.8	93799.9	68232.8	50375.9	17043.2
658.2	48833.8	93533.5	68000	50212.3	16991
658.3	48963	93265.2	67763.2	50044.4	16938.1
658.4	49095.4	92995.1	67523.2	49872.2	16884.9
658.5	49231	92723	67280.1	49695.5	16831.2
658.6	49370	92448.8	67034.1	49514.1	16777.3
658.7	49512.7	92171.9	66785	49327.7	16723
658.8	49659.7	91891.3	66532.4	49135.4	16668.2
658.9	49810.8	91607.6	66276.8	48937.8	16613
659	49966	91321	66018.8	48735	16557.8
659.1	50125.9	91029.8	65757.3	48526.2	16502
659.2	50290.3	90734.3	65492.8	48312.2	16445.8
659.3	50458.9	90434.5	65225.6	48093.4	16389
659.4	50631.3	90130.5	64955.5	47870.2	16331.7
659.5	50807.4	89822.4	64682.7	47643.1	16273.8
659.6	50987.9	89509.2	64405.9	47411.6	16214.9
659.7	51172	89191.9	64125.8	47176.6	16155
659.8	51359.9	88870.7	63842.5	46938.3	16094.3
659.9	51551.3	88545.8	63556.1	46697.1	16032.6
660	51746.3	88217.2	63266.4	46452.9	15969.8
660.1	51945.4	87885	62973.1	46205.7	15905.6
660.2	52147.9	87550.1	62676.8	45956	15840.3
660.3	52353.8	87213.8	62378	45704.4	15773.8
660.4	52564.1	86875.7	62076	45449.9	15705.8
660.5	52778.3	86537.1	61771.6	45193.2	15636.4
660.6	52996.2	86198.8	61465.1	44934.3	15565.5
660.7	53217.6	85861.6	61156.9	44673.6	15493.1
660.8	53442.4	85526.4	60847.5	44411.4	15418.8
660.9	53671	85193.2	60536.5	44147.3	15342.3
661	53902.6	84863.4	60224.7	43882	15263.5
661.1	54137	84538.2	59912.7	43615.8	15182.3
661.2	54374.2	84217.7	59600.3	43348.7	15098.6
661.3	54614.5	83902.2	59287.8	43080.5	15011.9
661.4	54857.8	83591.9	58975.1	42811.2	14922.2
661.5	55103.6	83287.5	58663.2	42541.5	14829.5
661.6	55351.8	82989.7	58352.7	42271.6	14733.8
661.7	55603.4	82698.4	58043.2	42001	14634.8
661.8	55858.1	82414.1	57735.4	41730.3	14532.9
661.9	56115.9	82137.1	57429.9	41459.6	14428.2
662	56377	81868	57127.2	41189.6	14320.9
662.1	56641.3	81606.9	56828	40920.4	14211.2
662.2	56909.3	81353.7	56532.2	40652	14099
662.3	57180.6	81108.6	56240.7	40385.1	13984.5
662.4	57454.7	80872.5	55954.8	40121.1	13868.1
662.5	57732.7	80645	55674	39859.5	13749.7
662.6	58014.4	80425.7	55398.7	39600.7	13629.6
662.7	58299.8	80214.7	55129.3	39345.1	13507.9
662.8	58588.8	80012.1	54866.3	39093.2	13385.1
662.9	58881.3	79817.8	54610.2	38845.3	13261.4
663	59178.8	79630.9	54360.3	38600.6	13136.5
663.1	59480.8	79451.2	54117.2	38359.6	13011
663.2	59787.3	79279.1	53881.4	38122.9	12885.4
663.3	60098.9	79113.9	53652.8	37890	12760
663.4	60416.8	78955.2	53430.9	37660.5	12634.9
663.5	60741.8	78802.3	53215.9	37434	12510.3
663.6	61073.2	78655.4	53008.3	37210.9	12386.8
663.7	61411.3	78515.1	52808.9	36991.6	12264.5
663.8	61758.1	78379.9	52616.7	36774.9	12143.2
663.9	62113.2	78250.1	52431.9	36560.7	12023.2
664	62476.9	78125.7	52254.7	36349.1	11904.6
664.1	62849.2	78007.1	52085.1	36139.8	11787.5
664.2	63230.8	77894.3	51923.2	35932.7	11672
664.3	63623.2	77786.2	51768.4	35726.5	11557.7
664.4	64025.3	77683	51620.6	35521.1	11444.8
664.5	64436.9	77584.8	51480	35316.5	11333.4
664.6	64859.5	77490.8	51345.9	35111.7	11223.3
664.7	65293.2	77400.7	51217.8	34906.7	11114.6
664.8	65737.4	77314.3	51095.5	34701.3	11007.6
664.9	66192.2	77231.4	50978.7	34495.5	10902.4
665	66657.2	77151.8	50867.8	34289.4	10799.4
665.1	67134.9	77074.8	50762	34082	10698.3
665.2	67623.9	77000.2	50661.4	33873.8	10599.2
665.3	68124.4	76927.6	50566.1	33665	10502.3
665.4	68636.7	76857	50476.2	33456	10407.8
665.5	69161.4	76788.4	50391.9	33246.8	10315.8
665.6	69699.9	76721.5	50313.2	33037	10225.9
665.7	70251	76656.2	50240	32826.8	10138.4
665.8	70813.9	76592.2	50173	32616.8	10053.4
665.9	71390.7	76529.3	50112	32406.1	9970.35
666	71980.5	76467.4	50057	32194.8	9889.25
666.1	72583	76406.3	50007.9	31983	9810.11
666.2	73197.9	76346.2	49964.7	31770.9	9733.03
666.3	73825.2	76287	49927.5	31558.8	9658.13
666.4	74466.8	76229	49896.2	31345.7	9585.02
666.5	75120.7	76172.2	49870.5	31132.1	9513.73
666.6	75786.2	76116.6	49850.8	30918.3	9444.39
666.7	76463.8	76062.7	49836.8	30704.2	9376.74
666.8	77154.5	76010.9	49828.7	30489.5	9310.55
666.9	77858.9	75961.8	49826.3	30274.4	9245.69
667	78575.5	75915.8	49829.6	30059.1	9182.19
667.1	79303.4	75873.7	49838.8	29844.2	9120.13
667.2	80044.8	75836	49853.7	29628.6	9058.84
667.3	80798.3	75803.1	49874.2	29412.6	8998.29
667.4	81563	75775.4	49899.9	29196.2	8938.35
667.5	82338.4	75753.4	49930.6	28979.5	8878.96
667.6	83124.4	75738.1	49966.3	28762.6	8820.04
667.7	83922.8	75729.8	50006.3	28544.8	8761.31
667.8	84731.3	75728.7	50050.1	28326.7	8702.87
667.9	85548.3	75735.4	50097.5	28108.9	8644.83
668	86375.7	75750.4	50148.3	27891.1	8587
668.1	87213	75773.7	50202.1	27673.8	8529.39
668.2	88059.3	75805.3	50258.7	27457.5	8472.05
668.3	88914.2	75845.7	50317.9	27242.8	8415.05
668.4	89776.8	75895.3	50379.5	27030.5	8358.5
668.5	90650.9	75954.6	50443.3	26820.4	8302.35
668.6	91534.5	76023.1	50509.3	26613.3	8246.76
668.7	92426.4	76101.1	50577.5	26409.8	8191.86
668.8	93327.3	76188.5	50648	26209.7	8137.64
668.9	94239.2	76285.7	50720.8	26013.1	8084.09
669	95163.6	76393.2	50796	25820	8031.22
669.1	96098.8	76510.3	50873.4	25630.7	7979.1
669.2	97043.3	76637.1	50952.7	25445.6	7927.88
669.3	98000.6	76774.3	51034.1	25264.2	7877.51
669.4	98969.6	76921.4	51117.5	25086.5	7827.97
669.5	99949.6	77078.1	51202.8	24912.4	7779.25
669.6	100940	77244.6	51290.1	24742.1	7731.36
669.7	101941	77420.8	51379.4	24575.9	7684.34
669.8	102956	77607.9	51470.9	24413.3	7638.05
669.9	103983	77804.8	51564.2	24254.5	7592.5
670	105020	78011.4	51659.3	24099.7	7547.85
670.1	106069	78228	51756.2	23948.7	7504.03
670.2	107130	78455	51855.5	23801	7461.01
670.3	108205	78692.8	51957.6	23656.5	7418.77
670.4	109292	78940.8	52062.2	23515.1	7377.35
670.5	110388	79199	52169.3	23377	7336.87
670.6	111497	79468.3	52279.5	23241.5	7297.13
670.7	112618	79747.9	52392.1	23108.6	7258.2
670.8	113749	80037.5	52507.2	22978.2	7220.09
670.9	114888	80337	52624.6	22850.3	7182.88
671	116035	80646.3	52744.5	22724.8	7146.6
671.1	117192	80965.9	52867.4	22601.4	7110.99
671.2	118357	81294.6	52992.9	22480.3	7076.12
671.3	119526	81632	53120.7	22361.9	7042.14
671.4	120704	81978.6	53251.7	22246.1	7008.82
671.5	121888	82333.6	53385.9	22132.8	6976.14
671.6	123077	82696.5	53523.4	22022.1	6944.12
671.7	124270	83066.7	53664.4	21914.2	6912.77
671.8	125466	83443.3	53809.4	21809.2	6882.17
671.9	126669	83827.2	53959.3	21706.6	6852.1
672	127876	84216.7	54113.8	21606.7	6822.54
672.1	129085	84611.1	54272.6	21509.6	6793.53
672.2	130296	85009.8	54435.6	21415.1	6764.98
672.3	131510	85412.8	54603.3	21322.9	6736.79
672.4	132729	85820.1	54775.8	21232.7	6708.89
672.5	133950	86230.5	54952.8	21144.6	6681.31
672.6	135171	86643.2	55134	21058.7	6653.96
672.7	136395	87059.1	55320.2	20974.6	6626.59
672.8	137621	87477.9	55510.8	20892.5	6599.11
672.9	138848	87899	55705.5	20812.1	6571.45
673	140075	88322.2	55904.4	20733.6	6543.56
673.1	141301	88747.1	56107.3	20656.9	6515.49
673.2	142531	89175.4	56315.2	20581.8	6487.26
673.3	143762	89606.1	56527.3	20508.5	6458.95
673.4	144992	90038.7	56743.5	20437.2	6430.53
673.5	146224	90474.2	56963.9	20367.9	6402.08
673.6	147458	90913	57188.1	20300.6	6373.73
673.7	148693	91354.4	57415.6	20235.4	6345.6
673.8	149928	91798.5	57646.2	20172.4	6317.85
673.9	151162	92244.4	57879.2	20111.4	6290.74
674	152400	92694	58115.3	20052.7	6264.4
674.1	153639	93146.8	58353.9	19996.3	6238.93
674.2	154878	93602.7	58594.7	19942.4	6214.37
674.3	156117	94061.5	58837.2	19891.1	6190.79
674.4	157355	94523	59081.3	19842.7	6168.29
674.5	158597	94988.9	59327.4	19797.1	6147.01
674.6	159840	95458	59575	19754.4	6127.06
674.7	161081	95929.3	59823.5	19714.9	6108.65
674.8	162324	96404.7	60073.6	19678.4	6091.92
674.9	163570	96884	60325.3	19645.2	6076.86
675	164817	97366.8	60578.2	19615.3	6063.5
675.1	166063	97852.7	60832.2	19588.9	6051.9
675.2	167309	98340.8	61086.5	19566.1	6042.18
675.3	168559	98832.6	61342	19546.8	6034.36
675.4	169811	99327.1	61598	19530.8	6028.39
675.5	171063	99823.2	61853.4	19518.3	6024.25
675.6	172317	100321	62108.2	19509	6021.76
675.7	173572	100821	62362.4	19502.9	6020.69
675.8	174832	101324	62615.8	19500	6020.84
675.9	176094	101828	62867.8	19499.9	6022.04
676	177356	102334	63117.3	19502.7	6024.17
676.1	178622	102841	63365	19507.9	6026.97
676.2	179891	103349	63610.6	19515.3	6030.26
676.3	181162	103858	63854.1	19524.7	6033.91
676.4	182433	104367	64095.2	19536	6037.81
676.5	183703	104876	64333.8	19549.2	6041.87
676.6	184975	105385	64570.7	19564	6045.86
676.7	186247	105893	64805.5	19580.3	6049.83
676.8	187517	106398	65037.8	19597.9	6053.8
676.9	188786	106899	65268	19616.6	6057.6
677	190055	107397	65496.2	19636.5	6061.11
677.1	191322	107889	65722.3	19657.3	6064.25
677.2	192585	108376	65946.2	19678.9	6066.87
677.3	193842	108855	66167.3	19701.2	6068.84
677.4	195095	109327	66386.5	19724.1	6069.88
677.5	196343	109790	66603.5	19747.1	6070.01
677.6	197583	110243	66817.9	19770.2	6069.17
677.7	198813	110685	67030	19793.2	6067.3
677.8	200033	111116	67240.1	19815.9	6064.29
677.9	201243	111536	67448.6	19838.1	6059.97
678	202440	111944	67655.5	19860	6054.44
678.1	203621	112339	67860.3	19881.2	6047.73
678.2	204789	112721	68063.8	19901.7	6039.87
678.3	205941	113090	68266.1	19921.2	6030.95
678.4	207077	113445	68466.9	19939.7	6021.03
678.5	208196	113786	68666.4	19957	6010.13
678.6	209294	114112	68864.1	19973.1	5998.17
678.7	210376	114425	69060.9	19987.6	5985.09
678.8	211440	114724	69256.4	20000.7	5970.85
678.9	212484	115011	69450.2	20012.1	5955.42
679	213509	115284	69642.3	20021.6	5938.82
679.1	214517	115546	69833	20028.8	5921.09
679.2	215506	115795	70021.8	20033.8	5902.24
679.3	216476	116034	70208.8	20036.2	5882.37
679.4	217425	116262	70393.2	20036	5861.62
679.5	218355	116482	70576	20032.9	5840.17
679.6	219268	116693	70757	20026.7	5818.18
679.7	220163	116896	70936.3	20017.6	5795.83
679.8	221041	117092	71113.6	20005.2	5773.31
679.9	221899	117280	71288.7	19989.6	5750.83
680	222743	117462	71462.5	19970.7	5728.57
680.1	223571	117639	71634.6	19948.7	5706.59
680.2	224382	117809	71804.5	19923.8	5685.02
680.3	225179	117976	71972.8	19896	5663.9
680.4	225963	118138	72139.2	19865.6	5643.18
680.5	226734	118297	72303.6	19832.6	5622.88
680.6	227493	118452	72465.5	19797.2	5603.03
680.7	228236	118603	72624.4	19759.5	5583.77
680.8	228967	118752	72780.6	19719.5	5565.1
680.9	229684	118899	72933.8	19677.6	5547.01
681	230386	119044	73083.7	19633.9	5529.7
681.1	231071	119188	73230.3	19588.6	5513.29
681.2	231741	119331	73373.7	19542.1	5497.83
681.3	232395	119474	73513.9	19494.7	5483.4
681.4	233034	119616	73650.8	19446.7	5470.14
681.5	233652	119757	73784	19398.5	5458.19
681.6	234254	119900	73914	19350.4	5447.6
681.7	234838	120044	74040.7	19302.9	5438.28
681.8	235404	120189	74164.2	19256.2	5430.13
681.9	235954	120335	74284.4	19210.4	5423.11
682	236484	120482	74400.9	19165.7	5417.22
682.1	236998	120631	74513.9	19122.6	5412.16
682.2	237494	120782	74623	19080.9	5407.82
682.3	237971	120934	74727.9	19040.7	5404.12
682.4	238429	121087	74828.6	19002.1	5400.87
682.5	238869	121241	74925	18965	5397.94
682.6	239289	121396	75017.2	18929.3	5395.26
682.7	239691	121550	75104.9	18894.8	5392.75
682.8	240073	121703	75187.8	18861.6	5390.56
682.9	240434	121854	75266.3	18829.6	5388.65
683	240775	122001	75340.4	18798.6	5387.01
683.1	241095	122145	75410	18768.7	5385.57
683.2	241395	122283	75475.3	18739.7	5384.28
683.3	241676	122415	75536.5	18711.4	5383.06
683.4	241936	122539	75594	18683.8	5381.85
683.5	242178	122655	75647.7	18656.7	5380.46
683.6	242399	122761	75697.2	18630.4	5378.8
683.7	242600	122855	75742.8	18604.4	5376.74
683.8	242780	122938	75784.5	18578.6	5374.16
683.9	242940	123010	75822.1	18553	5370.96
684	243081	123069	75855.5	18527.5	5367.06
684.1	243199	123115	75884.3	18502	5362.38
684.2	243296	123147	75908.7	18476.2	5356.96
684.3	243373	123166	75928.4	18450.1	5350.88
684.4	243426	123172	75943.3	18423.8	5344.22
684.5	243458	123164	75953	18397.2	5337.07
684.6	243466	123143	75957.6	18370.2	5329.5
684.7	243454	123109	75957.3	18342.8	5321.52
684.8	243420	123064	75952	18315.1	5313.08
684.9	243366	123006	75941.6	18287.2	5304.13
685	243291	122937	75926	18258.8	5294.6
685.1	243197	122856	75905	18230	5284.41
685.2	243085	122766	75878.5	18200.7	5273.5
685.3	242956	122667	75846.6	18170.7	5261.77
685.4	242810	122559	75809	18140	5249.17
685.5	242648	122442	75765.2	18108.1	5235.5
685.6	242472	122318	75715.3	18075.1	5220.83
685.7	242282	122188	75659.4	18040.7	5205.12
685.8	242078	122051	75596.9	18005	5188.41
685.9	241860	121908	75527.6	17967.8	5170.8
686	241630	121760	75451.6	17929.2	5152.47
686.1	241388	121606	75369	17889	5133.55
686.2	241134	121447	75279.8	17847.2	5114.27
686.3	240869	121283	75183.8	17803.8	5094.63
686.4	240592	121113	75081.6	17759	5074.68
686.5	240305	120938	74973.4	17712.9	5054.48
686.6	240008	120757	74859.3	17665.5	5034.02
686.7	239701	120571	74739.4	17617	5013.29
686.8	239383	120379	74613.5	17567.6	4992.23
686.9	239055	120182	74482.2	17517.6	4970.74
687	238718	119980	74345.8	17467.2	4948.78
687.1	238371	119773	74204.1	17416.7	4926.24
687.2	238014	119561	74057.1	17366.4	4903.08
687.3	237646	119344	73904.9	17316.7	4879.36
687.4	237268	119124	73747.3	17268	4855.18
687.5	236880	118900	73584.1	17220.5	4830.6
687.6	236479	118673	73414.9	17174.7	4805.74
687.7	236065	118442	73240.2	17130.7	4780.75
687.8	235640	118208	73060.2	17089	4755.76
687.9	235201	117970	72874.8	17049.8	4730.84
688	234748	117729	72684	17013.4	4706
688.1	234281	117484	72488.4	16979.8	4681.28
688.2	233800	117236	72287.7	16949.4	4656.74
688.3	233306	116985	72082.4	16922.2	4632.45
688.4	232798	116729	71872.3	16898.1	4608.38
688.5	232275	116469	71657.7	16877	4584.5
688.6	231740	116205	71439.1	16858.8	4560.79
688.7	231194	115937	71216.7	16843.4	4537.27
688.8	230635	115665	70990.3	16830.6	4513.97
688.9	230061	115387	70759.2	16820	4490.95
689	229475	115105	70524	16811.4	4468.46
689.1	228877	114817	70285.4	16804.4	4446.7
689.2	228264	114522	70043.5	16798.6	4425.78
689.3	227636	114221	69798.4	16793.6	4405.79
689.4	226994	113913	69551	16789	4386.82
689.5	226338	113597	69301.4	16784.5	4368.92
689.6	225667	113273	69050.6	16779.7	4352.24
689.7	224978	112940	68798.2	16774.1	4336.75
689.8	224274	112596	68544.7	16767.2	4322.4
689.9	223554	112243	68290.9	16758.8	4309.18
690	222820	111879	68037.3	16748.5	4297
690.1	222070	111505	67783.8	16736	4285.67
690.2	221303	111120	67529.7	16720.9	4275.01
690.3	220521	110725	67275.4	16703.1	4264.81
690.4	219725	110320	67021.2	16682.7	4255.1
690.5	218915	109905	66766.4	16659.4	4245.92
690.6	218088	109482	66510.7	16633.1	4237.31
690.7	217248	109050	66254.4	16604	4229.32
690.8	216395	108612	65997.3	16572	4222.01
690.9	215530	108167	65739.5	16537.4	4215.44
691	214651	107715	65479.7	16499.9	4209.63
691.1	213758	107258	65217.8	16459.9	4204.6
691.2	212855	106796	64954	16417.5	4200.45
691.3	211940	106330	64687.8	16372.8	4197.25
691.4	211013	105859	64418.8	16326.1	4194.98
691.5	210076	105384	64147.3	16277.4	4193.52
691.6	209131	104907	63873.1	16227.2	4192.75
691.7	208179	104428	63596.1	16175.5	4192.58
691.8	207219	103947	63315.4	16122.4	4192.91
691.9	206252	103464	63031.1	16068.3	4193.68
692	205280	102981	62743.6	16013.3	4194.95
692.1	204304	102499	62453.3	15957.6	4196.86
692.2	203323	102017	62160	15901.3	4199.47
692.3	202336	101535	61863.6	15844.6	4202.85
692.4	201343	101054	61564.9	15787.7	4206.96
692.5	200348	100574	61264.8	15730.4	4211.8
692.6	199347	100095	60963.4	15673.1	4217.43
692.7	198340	99616.6	60661.2	15615.6	4223.87
692.8	197329	99138.2	60359.2	15558.1	4231.1
692.9	196312	98660.1	60058.1	15500.6	4239
693	195293	98183.1	59759.1	15443	4247.44
693.1	194268	97705.2	59461.9	15385.5	4256.09
693.2	193239	97226.7	59167	15327.9	4264.65
693.3	192208	96748.2	58875	15270.4	4272.91
693.4	191176	96269.7	58586.2	15213	4280.66
693.5	190141	95790.1	58300.1	15155.8	4287.75
693.6	189105	95310.4	58017.4	15098.9	4294.09
693.7	188069	94831	57738	15042.5	4299.54
693.8	187036	94353.2	57462.1	14986.7	4303.98
693.9	186003	93875.8	57188.9	14931.7	4307.31
694	184972	93398.7	56918.2	14877.5	4309.48
694.1	183944	92922.9	56649.8	14824.2	4310.53
694.2	182919	92448.6	56383.5	14772	4310.5
694.3	181899	91977.1	56119.6	14721.3	4309.48
694.4	180882	91506.3	55856.7	14671.8	4307.46
694.5	179870	91036.9	55594.7	14623.7	4304.39
694.6	178862	90569.2	55333	14577.2	4300.12
694.7	177860	90102.8	55071	14532.4	4294.63
694.8	176864	89637.2	54808	14489.3	4287.9
694.9	175873	89171.8	54543.1	14447.8	4279.94
695	174888	88707.3	54276.6	14408.3	4270.89
695.1	173909	88243.8	54007.6	14370.7	4260.77
695.2	172935	87780.6	53735.4	14335	4249.71
695.3	171968	87317.8	53460.3	14301.1	4237.84
695.4	171006	86855.7	53181.9	14269	4225.26
695.5	170050	86394.4	52900.3	14238.4	4212.11
695.6	169099	85933.7	52615.3	14209.2	4198.61
695.7	168151	85472.8	52326.5	14181.1	4184.9
695.8	167205	85011.8	52034.3	14153.8	4171.07
695.9	166262	84552	51740.3	14127.2	4157.11
696	165321	84091.9	51443.5	14101.1	4143.01
696.1	164379	83630.5	51143.8	14075.1	4128.6
696.2	163437	83168.3	50841.9	14049	4113.71
696.3	162494	82704.9	50537.9	14022.4	4098.19
696.4	161551	82241.2	50232.8	13995.2	4081.86
696.5	160607	81776.6	49926.5	13967.2	4064.67
696.6	159660	81310.3	49618.4	13938.2	4046.5
696.7	158709	80842.8	49309.1	13908	4027.19
696.8	157758	80375.5	48999.3	13876.6	4006.71
696.9	156804	79907.4	48688.1	13843.9	3985.02
697	155847	79439.3	48376.2	13809.8	3962.2
697.1	154887	78971.5	48063.2	13774.1	3938.34
697.2	153924	78505.1	47749.3	13736.9	3913.51
697.3	152957	78040.1	47434.6	13698.2	3887.83
697.4	151988	77577.1	47119.1	13658.2	3861.4
697.5	151015	77115.9	46802.3	13616.9	3834.1
697.6	150041	76658	46485	13574.4	3806.09
697.7	149064	76202.2	46166.4	13530.7	3777.25
697.8	148083	75748.2	45846.6	13485.9	3747.55
697.9	147100	75296.7	45525.8	13440.2	3717.08
698	146115	74848.3	45204.5	13394.1	3685.88
698.1	145128	74402.5	44882.7	13347.6	3653.9
698.2	144140	73958.8	44560.4	13301.2	3621.15
698.3	143151	73517.7	44238.1	13255.2	3587.8
698.4	142160	73078.5	43915.9	13209.6	3553.73
698.5	141171	72643	43595	13164.9	3519.26
698.6	140182	72210.1	43275.5	13121.1	3484.37
698.7	139194	71779.9	42958.2	13078.6	3449.15
698.8	138208	71352.7	42643.7	13037.3	3413.7
698.9	137224	70928.3	42332.5	12997.3	3378.05
699	136242	70506.4	42025.4	12958.8	3342.19
699.1	135263	70086.6	41722.8	12921.6	3306.06
699.2	134289	69668.6	41425.8	12885.7	3269.56
699.3	133318	69252.3	41135.2	12851	3232.67
699.4	132353	68837.3	40851	12817.6	3195.37
699.5	131393	68423.4	40574.1	12785.3	3157.62
699.6	130439	68010.1	40304.8	12754.2	3119.36
699.7	129492	67597.3	40043.4	12724.3	3080.6
699.8	128553	67184.7	39790.5	12695.4	3041.35
699.9	127622	66772.3	39546.4	12667.6	3001.73
700	126701	66360.2	39310.7	12640.6	2961.89
700.1	125789	65948.7	39084.1	12614.5	2921.92
700.2	124889	65538.1	38866.6	12589.2	2882.01
700.3	123999	65128.2	38657.4	12564.4	2842.33
700.4	123120	64719.2	38456.5	12540	2803.04
700.5	122253	64310.8	38263.6	12515.9	2764.28
700.6	121397	63903.4	38078.1	12492	2726.17
700.7	120553	63497.3	37900.1	12468	2688.9
700.8	119721	63092.7	37729.2	12443.9	2652.68
700.9	118899	62689.5	37564.2	12419.5	2617.57
701	118088	62288	37405	12394.8	2583.78
701.1	117288	61888	37250.8	12369.9	2551.41
701.2	116497	61489.6	37101.3	12344.8	2520.59
701.3	115716	61093.1	36956.2	12319.5	2491.5
701.4	114945	60698.7	36814.8	12294.2	2464.24
701.5	114183	60306.6	36676.6	12268.9	2438.86
701.6	113429	59917.1	36541.3	12243.8	2415.69
701.7	112684	59530.2	36408.2	12218.6	2394.66
701.8	111946	59146	36277.1	12193.6	2375.95
701.9	111215	58764.8	36147.7	12168.6	2359.67
702	110491	58386.5	36019.7	12143.7	2345.74
702.1	109774	58011.3	35892.7	12118.6	2334.19
702.2	109062	57639.6	35766.7	12093.3	2325.14
702.3	108356	57271.2	35641.2	12067.5	2318.53
702.4	107655	56906	35516	12041.2	2314.16
702.5	106959	56544.1	35390.8	12014.2	2312.17
702.6	106267	56185	35265.3	11986.4	2312.25
702.7	105579	55829	35139.4	11957.8	2314.46
702.8	104896	55476.3	35012.8	11928.4	2318.77
702.9	104215	55126.8	34885.3	11898	2325.02
703	103538	54780.5	34756.7	11866.9	2333.08
703.1	102864	54437.5	34626.8	11834.9	2342.94
703.2	102193	54097.7	34495.5	11802.1	2354.37
703.3	101523	53761.6	34362.5	11768.5	2367.43
703.4	100856	53429.4	34227.6	11734.2	2382.04
703.5	100189	53101.1	34090.9	11699.2	2397.97
703.6	99524.5	52777.1	33951.9	11663.6	2415.22
703.7	98860.6	52457.6	33810.5	11627.3	2433.67
703.8	98197.2	52142.5	33666.4	11590.5	2453.21
703.9	97534	51832.3	33519.4	11553.2	2473.73
704	96870.8	51527.2	33369.3	11515.5	2495.05
704.1	96207.2	51226.9	33216.2	11477.6	2516.92
704.2	95543.3	50932.2	33059.7	11439.6	2539.27
704.3	94878.9	50643.2	32899.8	11401.8	2561.9
704.4	94214	50359.8	32736.7	11364.4	2584.57
704.5	93548.4	50082.5	32570.4	11327.6	2607.07
704.6	92882.3	49811.4	32401	11291.7	2629.19
704.7	92216	49546.6	32228.9	11256.7	2650.78
704.8	91550	49288.6	32054.1	11223.1	2671.61
704.9	90885	49037.7	31876.7	11190.8	2691.54
705	90221.4	48793.4	31697.6	11159.8	2710.56
705.1	89559.7	48556	31516.7	11130.5	2728.43
705.2	88900.6	48325	31334.6	11102.7	2745.04
705.3	88244.9	48100.3	31151.7	11076.3	2760.25
705.4	87593.7	47881.8	30968.2	11051.4	2773.92
705.5	86948	47669.1	30784.7	11027.7	2786.04
705.6	86308.5	47461.5	30601.5	11005	2796.61
705.7	85677	47258.9	30419	10983.4	2805.43
705.8	85053.6	47060.6	30237.5	10962.7	2812.59
705.9	84439.7	46866.4	30057.5	10943	2817.96
706	83836.2	46675.8	29879.2	10924.4	2821.48
706.1	83243.5	46488.4	29702.9	10906.7	2823.3
706.2	82662.1	46303.6	29528.9	10890	2823.5
706.3	82093.2	46121.4	29357.5	10874.3	2822.15
706.4	81536.8	45941.3	29189.1	10859.6	2819.38
706.5	80992.4	45763	29023.5	10845.9	2815.4
706.6	80461.1	45586.2	28861.4	10833.2	2810.25
706.7	79941.8	45410.7	28702.8	10821.6	2804.15
706.8	79435.2	45236.2	28547.8	10811	2797.14
706.9	78941.4	45062.6	28396.6	10801.2	2789.37
707	78459.7	44889.7	28249.2	10792.3	2780.97
707.1	77989.5	44717.7	28105.5	10783.9	2772.05
707.2	77530.7	44546.7	27965.7	10776.1	2762.66
707.3	77081.9	44376.6	27829.5	10768.9	2752.88
707.4	76643.2	44207.6	27697	10762.4	2742.7
707.5	76213.8	44039.8	27568.3	10756.3	2732.14
707.6	75792	43873.3	27443.1	10750.7	2721.25
707.7	75377.4	43708.5	27321.5	10745.3	2710.02
707.8	74969	43545.4	27203.7	10740	2698.44
707.9	74566.1	43384.4	27089.6	10734.9	2686.5
708	74168.1	43225.8	26979.4	10730	2674.17
708.1	73774.1	43069.7	26873.1	10725.1	2661.46
708.2	73383.1	42915.9	26770.4	10720.1	2648.38
708.3	72994.7	42764.7	26671.5	10714.8	2634.84
708.4	72608.3	42616.1	26576.5	10708.8	2620.87
708.5	72223.3	42469.9	26485.1	10702	2606.53
708.6	71839.4	42326.2	26397	10694.3	2591.84
708.7	71456.5	42184.9	26312.2	10685.4	2576.82
708.8	71074.1	42045.5	26230.1	10675.4	2561.53
708.9	70691.8	41908.1	26150.9	10664.1	2545.97
709	70309.2	41772.2	26074.1	10651.4	2530.12
709.1	69926.1	41637.7	25999.2	10637.4	2513.99
709.2	69542.5	41504.5	25926.1	10622	2497.68
709.3	69158.5	41372.5	25854.4	10605.3	2481.33
709.4	68773.9	41241.7	25783.8	10587.5	2465.01
709.5	68388.7	41111.8	25714	10568.9	2448.85
709.6	68002.7	40982.6	25644.8	10549.6	2432.92
709.7	67615.7	40853.8	25576.1	10530	2417.29
709.8	67227.7	40725.3	25507.7	10510	2402.06
709.9	66839	40597	25439.5	10489.8	2387.3
710	66449.9	40468.8	25371.6	10469.7	2373.14
710.1	66060.6	40340.6	25303.8	10449.7	2359.69
710.2	65671.3	40212.1	25236.1	10429.9	2346.93
710.3	65281.9	40083	25168.5	10410.4	2334.82
710.4	64892.8	39953.2	25101.2	10391.3	2323.33
710.5	64504.1	39822.6	25034.2	10372.7	2312.36
710.6	64116.1	39691.2	24967.8	10354.4	2301.82
710.7	63729.4	39558.9	24902	10336.6	2291.67
710.8	63344.3	39425.7	24837	10319.2	2281.9
710.9	62961.4	39291.5	24773	10302.2	2272.46
711	62581.1	39156.5	24710.4	10285.6	2263.29
711.1	62203.8	39020.7	24649.5	10269.4	2254.26
711.2	61830.1	38884.3	24590.4	10253.6	2245.34
711.3	61461	38747.5	24533.5	10238.2	2236.49
711.4	61096.7	38610.5	24478.9	10223	2227.71
711.5	60738.5	38473.4	24427.1	10207.8	2219.03
711.6	60387.2	38336.3	24378.2	10192.2	2210.46
711.7	60042.8	38199.3	24332	10176.3	2202.01
711.8	59705.9	38062.3	24288.7	10160	2193.68
711.9	59377	37925.3	24248.3	10143.3	2185.45
712	59056.5	37788.4	24210.7	10126.1	2177.39
712.1	58745.3	37651.4	24175.9	10108.2	2169.63
712.2	58443.7	37514.6	24143.6	10089.6	2162.33
712.3	58151.2	37378	24113.4	10070.3	2155.66
712.4	57868.6	37241.7	24084.9	10050.6	2149.86
712.5	57596.5	37105.8	24057.7	10030.8	2145.15
712.6	57334.3	36970.7	24031.5	10011.1	2141.7
712.7	57082.3	36836.5	24005.8	9991.64	2139.75
712.8	56840.5	36703.5	23980.6	9972.73	2139.59
712.9	56608.7	36571.7	23955.5	9954.45	2141.4
713	56387.3	36441.2	23930	9937.14	2145.55
713.1	56176	36312.4	23904.1	9921.07	2152.27
713.2	55973.7	36185	23877.6	9906.4	2161.46
713.3	55780.5	36058.8	23850.3	9893.52	2173.3
713.4	55595.4	35933.8	23822.3	9882.58	2187.7
713.5	55417.7	35809.7	23793.7	9873.68	2204.7
713.6	55247.3	35686.5	23764.5	9866.96	2224.34
713.7	55083.2	35564	23734.6	9862.46	2246.51
713.8	54924.4	35442.3	23703.9	9860.18	2271
713.9	54770.7	35321.3	23672.2	9860.56	2297.89
714	54620.8	35200.9	23639.8	9863.47	2326.82
714.1	54474.3	35081.1	23606.6	9869.03	2357.75
714.2	54330.5	34962.1	23572.7	9877.17	2390.57
714.3	54188.8	34843.9	23538.3	9887.58	2425.07
714.4	54048.6	34726.9	23503.3	9900.14	2461.06
714.5	53909.3	34611.2	23467.9	9914.83	2498.38
714.6	53770.2	34497	23432	9931.48	2536.75
714.7	53631	34384.2	23395.7	9949.81	2575.83
714.8	53490.5	34272.9	23359.1	9969.7	2615.35
714.9	53348.5	34162.9	23322.2	9990.7	2654.9
715	53204.3	34054.3	23284.8	10012.7	2694.19
715.1	53057.4	33947.3	23246.7	10035.5	2732.96
715.2	52907.7	33841.8	23207.4	10059	2770.95
715.3	52754.8	33737.8	23166.7	10083	2807.89
715.4	52598.4	33635.3	23124.2	10107.5	2843.5
715.5	52438.4	33534.3	23079.7	10132.3	2877.7
715.6	52274.7	33435	23032.6	10157.6	2910.13
715.7	52107.2	33337.7	22982.6	10183.1	2940.68
715.8	51936.6	33242.7	22929.7	10208.9	2969.38
715.9	51762.9	33150.2	22873.6	10235.1	2996.13
716	51586.3	33060.6	22814.2	10261.5	3020.91
716.1	51407.1	32973.9	22751.5	10288.3	3043.69
716.2	51225.4	32890.1	22685.5	10315.4	3064.27
716.3	51041.4	32809	22616.4	10342.9	3082.61
716.4	50855.7	32730.3	22544.6	10370.8	3098.83
716.5	50668.4	32654	22470.3	10399.3	3112.75
716.6	50479.6	32579.7	22393.7	10428.2	3124.32
716.7	50289.5	32506.9	22315.3	10457.8	3133.65
716.8	50098.3	32435.2	22235.2	10488	3140.71
716.9	49906.3	32364.2	22153.7	10518.7	3145.46
717	49714.1	32293.4	22071.3	10550.1	3148
717.1	49522.1	32222.7	21988.1	10582	3148.27
717.2	49330.9	32151.8	21904.6	10614.4	3146.33
717.3	49141	32080.8	21821	10647	3142.55
717.4	48952.9	32009.5	21737.6	10679.7	3136.89
717.5	48767	31938	21654.7	10712.1	3129.46
717.6	48583.9	31866.1	21572.5	10743.9	3120.31
717.7	48404.3	31793.9	21491.5	10774.8	3109.44
717.8	48228.3	31721	21411.8	10804.5	3096.96
717.9	48056.2	31647.5	21333.7	10832.6	3083.01
718	47888.2	31573.3	21257.8	10858.9	3067.56
718.1	47724.1	31498.6	21183.9	10883	3050.77
718.2	47564.1	31423.3	21112.4	10904.6	3032.66
718.3	47408.5	31347.2	21043.3	10923.4	3013.22
718.4	47257.1	31270.4	20976.7	10939.6	2992.65
718.5	47110.1	31193	20912.7	10952.9	2971.13
718.6	46968	31114.9	20851.3	10963.3	2948.86
718.7	46830.7	31036.7	20792.5	10970.6	2926.11
718.8	46698	30958.7	20736.2	10975.1	2903.13
718.9	46570.6	30881.4	20682.5	10976.6	2880.18
719	46448.1	30805.2	20631.2	10975.3	2857.54
719.1	46330.8	30730.4	20582.5	10971.1	2835.42
719.2	46218.8	30657.2	20536.6	10964.2	2814.09
719.3	46111.7	30585.8	20493.4	10954.6	2793.77
719.4	46009.3	30516.4	20453	10942.4	2774.66
719.5	45911.2	30449.2	20415.5	10927.8	2756.99
719.6	45817.2	30384	20381	10910.9	2740.76
719.7	45726.9	30321.1	20349.7	10891.9	2726.22
719.8	45640.3	30260.2	20321.8	10870.9	2713.43
719.9	45556.7	30200.8	20296.9	10848.5	2702.43
720	45475.9	30142.5	20275.1	10824.7	2693.41
720.1	45397.6	30085.4	20256.3	10799.7	2686.45
720.2	45321.7	30029.2	20240.2	10773.8	2681.6
720.3	45248	29974.2	20226.7	10746.9	2679.01
720.4	45176.6	29920.1	20215.2	10719	2678.62
720.5	45107.3	29866.9	20205.5	10690.2	2680.23
720.6	45040.1	29814.4	20197.2	10660.3	2683.97
720.7	44974.7	29762.5	20190	10629.2	2689.82
720.8	44911.1	29710.9	20183.3	10596.7	2697.53
720.9	44849.1	29659.6	20176.8	10562.6	2706.98
721	44788.5	29608.6	20170.2	10526.9	2717.92
721.1	44729.1	29557.5	20163.2	10489.4	2730.03
721.2	44670.5	29506.1	20155.5	10450	2743.11
721.3	44612.6	29453.9	20146.8	10408.6	2756.86
721.4	44554.6	29400.5	20136.8	10365.6	2771
721.5	44496.4	29345.9	20125	10321.1	2785.39
721.6	44437.7	29290	20110.9	10275.3	2799.83
721.7	44378.2	29232.9	20094.1	10228.3	2814.08
721.8	44317.7	29174.5	20074.4	10180.3	2827.83
721.9	44255.9	29115	20051.2	10131.7	2840.89
722	44192.5	29054.7	20024.6	10082.7	2853.14
722.1	44127.1	28993.5	19993.8	10033.4	2864.43
722.2	44059.5	28931.6	19958.8	9984.31	2874.8
722.3	43989.3	28869.3	19919.3	9935.53	2884.09
722.4	43915.9	28806.8	19875.1	9887.3	2892.17
722.5	43839.3	28744.4	19826.4	9839.84	2898.94
722.6	43759	28682.1	19773.3	9793.37	2904.3
722.7	43674.5	28619.9	19715.7	9748.19	2908.13
722.8	43585.3	28557.8	19653.6	9704.57	2910.57
722.9	43491.5	28495.7	19587.5	9662.65	2911.78
723	43392.5	28433.5	19517	9622.93	2911.64
723.1	43288.9	28371.4	19442.8	9585.49	2910.28
723.2	43180.3	28309.5	19364.9	9550.59	2907.58
723.3	43066.6	28247.8	19283.3	9518.43	2903.48
723.4	42948.3	28186.5	19198.4	9488.98	2898.09
723.5	42825.7	28125.5	19110.4	9462.17	2891.5
723.6	42698.6	28064.8	19019.5	9438.01	2883.77
723.7	42567.7	28004.5	18925.9	9416.21	2875.03
723.8	42433.2	27944.5	18829.9	9396.68	2865.13
723.9	42295.3	27885.1	18731.7	9379.11	2854.08
724	42154.6	27826.1	18632.1	9363.03	2841.86
724.1	42011.3	27767.6	18531.2	9348.15	2828.44
724.2	41865.7	27709.2	18429.6	9334.17	2813.84
724.3	41718.5	27650.9	18327.5	9320.83	2798.15
724.4	41570	27592.2	18225.7	9307.93	2781.37
724.5	41420.7	27533.3	18124.6	9295.36	2763.54
724.6	41271.2	27473.9	18024.8	9282.89	2744.66
724.7	41122	27414.2	17926.7	9270.36	2724.59
724.8	40973.5	27354.1	17831	9257.66	2703.41
724.9	40826.2	27293.8	17737.8	9244.7	2681.25
725	40680.7	27233.1	17647.7	9231.46	2658.23
725.1	40537.5	27172.3	17560.9	9217.93	2634.48
725.2	40396.8	27111.6	17477.5	9204.12	2610.13
725.3	40259.3	27051.3	17398	9189.97	2585.24
725.4	40125.1	26991.9	17322.6	9175.49	2559.95
725.5	39994.2	26933.4	17251.3	9160.32	2534.39
725.6	39867	26876	17184.4	9144.66	2508.73
725.7	39743.5	26819.9	17122.1	9128.52	2483.17
725.8	39623.8	26764.8	17064.4	9111.97	2457.92
725.9	39508.3	26711.1	17011.7	9095.1	2433.21
726	39396.8	26658.7	16963.8	9078.05	2409.21
726.1	39289	26607.5	16920.5	9060.8	2386.07
726.2	39185.3	26557.7	16881.8	9043.31	2363.96
726.3	39085.2	26509	16847.2	9025.58	2342.85
726.4	38989.1	26461.5	16816.8	9007.7	2322.88
726.5	38897	26415.2	16790.1	8989.75	2304.2
726.6	38808.6	26369.8	16766.6	8971.7	2286.91
726.7	38723.7	26325	16745.8	8953.43	2271.1
726.8	38642.2	26281.3	16727.1	8934.87	2256.76
726.9	38563.8	26238.4	16709.9	8915.76	2243.79
727	38488.1	26195.8	16693.5	8895.93	2232.07
727.1	38415.2	26153.8	16677.8	8875.16	2221.65
727.2	38344.6	26111.8	16662.2	8853.38	2212.4
727.3	38276.2	26069.5	16646.4	8830.46	2204.39
727.4	38209.5	26026.7	16629.9	8806.24	2197.66
727.5	38144.3	25982.8	16612.7	8780.63	2192.08
727.6	38080.1	25937.7	16594.5	8753.54	2187.5
727.7	38016.7	25890.7	16575.1	8724.82	2183.79
727.8	37953.6	25841.7	16554.3	8694.48	2180.75
727.9	37891	25790.4	16532.2	8662.61	2178.48
728	37828.6	25736.2	16508.5	8629.24	2176.82
728.1	37765.7	25678.8	16483.1	8594.36	2175.54
728.2	37702.5	25618.4	16456.2	8558.13	2174.61
728.3	37638.6	25555	16427.7	8520.61	2173.86
728.4	37573.7	25488.6	16397.8	8481.81	2173.01
728.5	37508	25419.3	16366.4	8441.96	2171.95
728.6	37441.2	25347.5	16333.7	8401.33	2170.58
728.7	37373.1	25273.4	16300.1	8360.09	2168.85
728.8	37303.8	25197.1	16265.9	8318.51	2166.77
728.9	37233	25118.8	16231.6	8276.76	2164.17
729	37160.8	25038.9	16197.4	8235.17	2161.01
729.1	37087.1	24957.9	16163.8	8194.07	2157.21
729.2	37011.9	24875.8	16130.9	8153.65	2152.61
729.3	36935	24792.9	16099.2	8114.1	2147.08
729.4	36856.6	24709.7	16068.6	8075.76	2140.6
729.5	36776.7	24626.1	16039.4	8038.69	2133.12
729.6	36695.1	24542.4	16011.9	8003.2	2124.43
729.7	36612.3	24458.9	15986	7969.35	2114.42
729.8	36528.2	24376.1	15961.7	7937.18	2102.99
729.9	36443	24294.1	15939	7906.83	2090.03
730	36356.5	24213.6	15918	7878.31	2075.48
730.1	36269	24134.6	15898.5	7851.48	2059.42
730.2	36180.9	24057.4	15880.8	7826.33	2041.87
730.3	36092.1	23982.5	15864.8	7803.04	2022.84
730.4	36003.2	23910	15850.4	7781.45	2002.59
730.5	35914.4	23840.1	15837.6	7761.48	1981.25
730.6	35826.1	23772.9	15826.2	7743.12	1958.86
730.7	35738.4	23708.5	15815.9	7726.29	1935.47
730.8	35651.7	23647.1	15806.7	7710.84	1911.19
730.9	35566.3	23588.2	15798.4	7696.61	1886.15
731	35482.6	23531.9	15791	7683.56	1860.41
731.1	35401.1	23478.3	15784.4	7671.73	1834.06
731.2	35322.1	23427.1	15778.4	7661.01	1807.24
731.3	35245.7	23378.2	15772.7	7651.29	1780.09
731.4	35172.3	23331.6	15767.4	7642.47	1752.67
731.5	35102.4	23287.6	15762.2	7634.45	1725.05
731.6	35035.8	23245.8	15757.2	7627.13	1697.42
731.7	34972.7	23206.3	15752	7620.45	1669.94
731.8	34913.8	23169.3	15746.7	7614.49	1642.89
731.9	34859	23134.4	15741	7609.32	1616.45
732	34808.3	23101.7	15734.7	7604.93	1590.78
732.1	34761.7	23071.2	15727.4	7601.27	1566.07
732.2	34719.5	23042.7	15718.7	7598.29	1542.59
732.3	34681.2	23016.1	15708.4	7595.89	1520.31
732.4	34646.8	22990.9	15696.4	7593.95	1499.32
732.5	34616.3	22967	15682.2	7592.49	1479.82
732.6	34589.2	22943.9	15665.8	7591.46	1461.85
732.7	34565.4	22921.3	15646.8	7590.74	1445.4
732.8	34544.5	22898.7	15625	7590.22	1430.52
732.9	34526.1	22875.9	15599.9	7589.68	1417.24
733	34510.3	22852.9	15571.4	7589.11	1405.6
733.1	34496.4	22829.2	15539.4	7588.24	1395.55
733.2	34484.2	22804.8	15503.9	7586.95	1387.09
733.3	34473.7	22779.3	15464.5	7585.07	1380.37
733.4	34464.5	22752.6	15421.2	7582.49	1375.49
733.5	34456.6	22724.5	15373.9	7579.1	1372.37
733.6	34449.9	22695	15322.7	7574.75	1371.01
733.7	34444.2	22664	15267.2	7569.16	1371.48
733.8	34439.4	22631.7	15207.9	7562.28	1373.67
733.9	34435.3	22597.9	15145.1	7554.06	1377.56
734	34432.1	22562.4	15078.7	7544.4	1383.16
734.1	34429.8	22524.9	15009	7533.29	1390.38
734.2	34428.2	22485.4	14936.3	7520.79	1399.07
734.3	34427.4	22443.7	14861.1	7506.91	1409.09
734.4	34427.3	22399.6	14783.4	7491.44	1420.34
734.5	34427.9	22353	14704.2	7474.52	1432.62
734.6	34429.1	22304.2	14623.9	7456.17	1445.75
734.7	34431	22252.7	14543.1	7436.33	1459.64
734.8	34433.9	22198.6	14462.1	7415.03	1474.13
734.9	34438	22142	14381.3	7392.39	1488.96
735	34443.4	22083.1	14301.2	7368.41	1503.92
735.1	34450.5	22022	14222.2	7343.04	1518.8
735.2	34459.1	21959	14144.9	7316.3	1533.34
735.3	34469.4	21894.5	14069.6	7288.27	1547.31
735.4	34481.3	21828.5	13996.6	7259.06	1560.53
735.5	34494.8	21761	13926.2	7228.75	1572.79
735.6	34510.2	21691.9	13858.6	7197.41	1583.91
735.7	34527.4	21621.4	13793.8	7165.15	1593.78
735.8	34546.2	21549.6	13732.1	7132.04	1602.19
735.9	34566.6	21476.5	13674	7097.97	1608.92
736	34588.1	21402.5	13619.4	7062.98	1613.94
736.1	34610.7	21327.6	13568.4	7027.09	1617.25
736.2	34634.2	21251.8	13521.1	6990.27	1618.76
736.3	34658.9	21175.3	13477.5	6952.51	1618.38
736.4	34684.5	21098	13437.4	6913.78	1616.18
736.5	34711.1	21020.3	13400.6	6873.9	1612.13
736.6	34738.6	20942.9	13367.5	6832.99	1606.23
736.7	34766.7	20866.1	13337.6	6790.78	1598.51
736.8	34795.4	20790.1	13310.8	6747.32	1589.15
736.9	34824.4	20715.3	13286.9	6702.62	1578.22
737	34853.8	20641.9	13265.8	6656.78	1565.82
737.1	34883.4	20570	13247.3	6609.87	1552.2
737.2	34913	20499.5	13230.9	6561.77	1537.42
737.3	34942.2	20430.8	13216.7	6512.52	1521.61
737.4	34970.8	20364.3	13204.9	6462.53	1504.9
737.5	34998.6	20299.8	13195.2	6411.71	1487.35
737.6	35025.3	20237.1	13187.4	6360.16	1469.12
737.7	35050.6	20176.3	13181.3	6307.95	1450.31
737.8	35074.5	20117.3	13177.1	6255.16	1430.99
737.9	35096.8	20059.7	13174.4	6201.73	1411.27
738	35117.2	20003.7	13173.2	6147.68	1391.18
738.1	35135.5	19949.6	13173.4	6092.97	1370.72
738.2	35151.5	19897.7	13174.8	6037.74	1349.99
738.3	35164.8	19847.9	13177.1	5981.87	1329.07
738.4	35175.5	19800.3	13179.9	5925.41	1308.03
738.5	35183.3	19754.9	13183.2	5868.42	1286.91
738.6	35187.8	19711.5	13186.3	5810.95	1265.74
738.7	35188.8	19670.2	13189.2	5753.16	1244.58
738.8	35186	19631.2	13191.7	5695.22	1223.44
738.9	35178.8	19594.7	13193.3	5637.27	1202.35
739	35167.2	19560.5	13194.1	5579.47	1181.41
739.1	35151	19528.4	13193.8	5521.93	1160.7
739.2	35129.8	19498.5	13192	5464.82	1140.25
739.3	35103.9	19470.1	13188.5	5408.21	1120.11
739.4	35073.4	19443.4	13183	5352.24	1100.31
739.5	35038.3	19418.4	13175.2	5297.01	1080.86
739.6	34998.8	19395	13165	5242.58	1061.86
739.7	34954.9	19373.4	13152	5189.06	1043.43
739.8	34907.4	19353.2	13136.3	5136.64	1025.61
739.9	34856.7	19334.1	13117.4	5085.52	1008.52
740	34803.2	19315.9	13095	5036.14	992.282
740.1	34747.4	19298.4	13069.3	4988.65	976.904
740.2	34689.9	19281.4	13040.1	4943.27	962.367
740.3	34630.9	19265	13007.5	4900.38	948.701
740.4	34570.7	19249.2	12971.9	4860.23	935.944
740.5	34510	19233.7	12933.3	4823.04	924.042
740.6	34449.1	19218.1	12892	4789.12	913.078
740.7	34388.9	19202.1	12848.1	4758.58	902.904
740.8	34329.7	19185.4	12801.5	4731.75	893.55
740.9	34272.1	19168.1	12752.7	4708.47	884.853
741	34216.3	19150	12702	4688.7	876.721
741.1	34162.9	19131.1	12649.6	4672.38	869.056
741.2	34112.1	19111.4	12596	4659.29	861.735
741.3	34064.5	19090.6	12541.2	4649.55	854.704
741.4	34020.3	19068.4	12485.6	4643.04	847.925
741.5	33979.2	19045	12429.5	4639.39	841.264
741.6	33941.3	19020.5	12373.1	4638.68	834.734
741.7	33906.3	18995.2	12316.8	4640.61	828.256
741.8	33874	18969.3	12261.1	4645	821.78
741.9	33844	18943.1	12206.1	4651.74	815.289
742	33816	18916.7	12152.1	4660.64	808.767
742.1	33789.5	18890.3	12099.1	4671.6	802.201
742.2	33763.9	18864	12047.2	4684.47	795.583
742.3	33738.8	18837.9	11996.5	4698.75	788.87
742.4	33713.8	18812.4	11947.1	4714.29	782.016
742.5	33688.7	18787.7	11899	4730.74	774.995
742.6	33663.1	18764	11852.2	4747.84	767.763
742.7	33636.7	18741.5	11806.6	4765.24	760.306
742.8	33609.1	18720.4	11762.1	4782.7	752.68
742.9	33580.4	18700.6	11718.5	4800.08	744.92
743	33550.3	18682.4	11675.9	4817.14	737.113
743.1	33518.7	18666.1	11634.2	4833.72	729.342
743.2	33485.5	18651.9	11593.4	4849.69	721.707
743.3	33450.8	18640.2	11553.7	4865.06	714.407
743.4	33414.7	18631.1	11514.8	4879.74	707.612
743.5	33377.1	18624.8	11476.9	4893.57	701.491
743.6	33338.3	18621.4	11439.9	4906.47	696.2
743.7	33298.6	18620.8	11403.8	4918.5	691.834
743.8	33258.3	18623.4	11368.5	4929.47	688.543
743.9	33217.6	18629.1	11333.8	4939.26	686.278
744	33177.1	18638.3	11300.1	4947.56	685.107
744.1	33137	18651	11267.2	4954.22	685.052
744.2	33097.9	18667.2	11235	4959.14	686.111
744.3	33060.2	18686.8	11203.4	4962.13	688.306
744.4	33024.2	18709.5	11172.5	4963.03	691.627
744.5	32990	18734.7	11142.2	4961.91	695.994
744.6	32958.4	18762.7	11112.6	4958.57	701.477
744.7	32929.4	18793.2	11083.5	4953.17	707.952
744.8	32903.3	18826.1	11055.1	4945.49	715.516
744.9	32880.3	18861.1	11027.3	4935.44	724.215
745	32860.4	18897.8	11000	4923.19	734.044
745.1	32843.5	18935.6	10973	4908.85	744.987
745.2	32829.8	18974.2	10946.2	4892.38	757.008
745.3	32818.9	19013.4	10919.4	4873.85	769.936
745.4	32811.2	19052.9	10892.5	4853.1	783.7
745.5	32806.2	19092.6	10865.4	4830.19	798.146
745.6	32804.4	19131.8	10837.7	4805.09	813.177
745.7	32805.8	19170	10809.3	4777.72	828.645
745.8	32810.5	19206.7	10780.1	4748.39	844.367
745.9	32818.5	19241.5	10750	4717.42	860.186
746	32830.3	19273.9	10718.8	4684.95	875.94
746.1	32845.8	19303.8	10686.6	4651.19	891.488
746.2	32865.7	19330.5	10653.3	4616.16	906.737
746.3	32890.7	19353.8	10619	4580.18	921.676
746.4	32920.4	19373.5	10583.8	4543.69	936.303
746.5	32955.4	19389.2	10547.8	4507.04	950.569
746.6	32995.7	19400.8	10511.3	4470.58	964.439
746.7	33041.5	19408.4	10474.3	4434.64	977.88
746.8	33093.1	19411.9	10437	4399.53	990.819
746.9	33150.6	19411.7	10399.8	4365.29	1003.2
747	33213.6	19407.9	10362.8	4331.94	1014.91
747.1	33282.3	19400.5	10326.5	4299.75	1025.84
747.2	33356.2	19389.7	10290.9	4268.87	1035.94
747.3	33435	19375.6	10256.2	4239.47	1045.05
747.4	33518.3	19358.1	10222.9	4211.55	1053.02
747.5	33605.6	19337.5	10191.1	4185.07	1059.78
747.6	33696.6	19313.5	10161.5	4160.03	1065.24
747.7	33790.5	19286.3	10134.3	4136.3	1069.39
747.8	33886.3	19255.9	10109.8	4113.65	1072.29
747.9	33983.2	19221.8	10088.7	4092.17	1073.76
748	34080.2	19184.2	10071.3	4071.9	1073.87
748.1	34176.2	19142.8	10057.9	4052.89	1072.56
748.2	34270.2	19097.5	10048.8	4034.94	1069.87
748.3	34361.1	19048.6	10044.2	4017.8	1065.84
748.4	34447.6	18995.8	10044.5	4001.33	1060.44
748.5	34528.5	18939.4	10049.9	3985.42	1053.68
748.6	34603.3	18879.6	10060	3970	1045.69
748.7	34670.1	18816.3	10075.3	3955.07	1036.38
748.8	34728.3	18749.5	10095.5	3940.44	1025.88
748.9	34777.2	18679.4	10120.6	3926.12	1014.3
749	34816	18606	10150.4	3911.97	1001.69
749.1	34844.3	18529.4	10185	3897.72	988.149
749.2	34862	18449.8	10224.3	3883.31	973.838
749.3	34869.3	18367.7	10268.1	3868.93	958.929
749.4	34865.8	18282.8	10316.1	3854.57	943.658
749.5	34851.6	18195.4	10368.3	3840.34	928.319
749.6	34827.5	18106.1	10424	3826.28	913.097
749.7	34793.7	18015.3	10482.8	3812.47	898.177
749.8	34750.5	17923.4	10544.3	3798.95	883.778
749.9	34698.7	17831	10608	3785.7	870.082
750	34639.1	17738.8	10673.1	3772.78	857.194
750.1	34572.1	17647.5	10739.2	3760.41	845.219
750.2	34498.4	17557.2	10805.6	3748.64	834.32
750.3	34418.3	17468.6	10871.7	3737.62	824.535
750.4	34332.9	17382.1	10936.6	3727.14	815.798
750.5	34242.9	17297.9	10999.8	3717.01	808.083
750.6	34149	17216.2	11060.9	3707.2	801.401
750.7	34052	17137	11119.5	3697.6	795.738
750.8	33952.6	17060.5	11175.1	3688.11	791.127
750.9	33851.6	16986.4	11227.2	3678.66	787.655
751	33749.7	16914.5	11275.3	3669.25	785.272
751.1	33647.6	16844.6	11319.2	3659.72	783.92
751.2	33546.1	16776.5	11358.3	3649.9	783.598
751.3	33445.9	16710	11392.2	3639.65	784.187
751.4	33347.2	16644.8	11421.2	3628.95	785.648
751.5	33250.4	16580.9	11444.8	3617.87	787.977
751.6	33156	16518.1	11462.6	3606.5	791.081
751.7	33063.9	16456.1	11474.7	3594.82	794.849
751.8	32974.3	16394.8	11480.9	3582.9	799.103
751.9	32887.8	16334.2	11481.4	3570.75	803.504
752	32804.8	16274.2	11476.1	3558.22	807.974
752.1	32725.2	16214.8	11465.7	3545.13	812.475
752.2	32649.5	16155.9	11450.4	3531.45	816.903
752.3	32578.1	16097.5	11430.4	3517.29	821.164
752.4	32511.2	16039.3	11406.2	3502.75	825.185
752.5	32449.4	15981.6	11377.9	3487.9	828.981
752.6	32393.1	15924.4	11345.9	3472.79	832.541
752.7	32342.2	15867.9	11310.7	3457.28	835.769
752.8	32297.3	15812.5	11272.5	3441.52	838.679
752.9	32258.7	15758.4	11231.6	3425.78	841.387
753	32225.9	15705.9	11188.4	3410.17	843.787
753.1	32199	15655.3	11143.2	3394.98	845.772
753.2	32178.2	15607.2	11095.6	3380.44	847.269
753.3	32163.1	15561.8	11046.1	3366.55	848.172
753.4	32153.4	15519.4	10994.9	3353.17	848.38
753.5	32149.5	15480.3	10942.2	3340.38	847.877
753.6	32151	15444.9	10888.1	3328.22	846.53
753.7	32157.6	15412.7	10833.3	3316.57	844.317
753.8	32169.1	15383.9	10777.7	3305.45	841.237
753.9	32185.4	15358.5	10721.6	3294.81	837.242
754	32206.2	15336.2	10665	3284.42	832.331
754.1	32231.2	15316.7	10608.4	3273.99	826.645
754.2	32259.9	15299.3	10551.9	3263.31	820.348
754.3	32292.2	15284	10495.9	3252.29	813.499
754.4	32327.4	15270.4	10440.5	3240.81	806.224
754.5	32364.6	15257.7	10386	3228.94	798.623
754.6	32403.6	15246	10332.7	3216.69	790.662
754.7	32443.5	15234.7	10280.7	3203.76	782.37
754.8	32483.9	15223.7	10229.9	3189.99	773.781
754.9	32524.3	15212.4	10180.6	3175.33	764.907
755	32564	15200.5	10133.2	3159.74	755.799
755.1	32602.4	15187.4	10087.8	3143.17	746.601
755.2	32639.1	15172.9	10044.4	3125.6	737.456
755.3	32673.4	15156.6	10003.5	3106.92	728.376
755.4	32705.1	15138.4	9965.11	3087.05	719.436
755.5	32734	15117.9	9929.07	3065.71	710.819
755.6	32759.6	15094.7	9895.58	3042.79	702.622
755.7	32782	15069	9864.94	3018.39	694.907
755.8	32801	15040.6	9837.01	2992.55	687.776
755.9	32816.4	15009.4	9811.61	2965.34	681.275
756	32827.9	14975.9	9788.89	2936.9	675.487
756.1	32835.3	14940.2	9768.58	2907.52	670.4
756.2	32838.9	14902.6	9749.97	2877.43	665.862
756.3	32838.5	14863.6	9732.97	2846.9	661.862
756.4	32833.8	14823.7	9717.45	2816.24	658.399
756.5	32824.7	14783.1	9703.02	2785.69	655.374
756.6	32811.2	14742.2	9689.38	2755.47	652.649
756.7	32793.3	14701.3	9676.38	2725.79	650.209
756.8	32771.1	14660.8	9663.8	2696.84	648.118
756.9	32744.7	14620.9	9651.37	2668.64	646.364
757	32714.2	14581.9	9638.76	2641.15	644.871
757.1	32680.1	14544	9625.79	2614.44	643.771
757.2	32642.3	14507.4	9612.5	2588.6	643.131
757.3	32600.8	14472.2	9598.9	2563.69	642.945
757.4	32555.9	14438.7	9584.86	2539.83	643.23
757.5	32507.6	14407	9570.22	2517.25	643.979
757.6	32455.7	14377.5	9554.89	2496.09	645.166
757.7	32400.1	14350.5	9538.75	2476.47	646.778
757.8	32340.7	14326.2	9521.68	2458.51	648.806
757.9	32277.7	14304.6	9503.78	2442.27	651.166
758	32210.5	14285.8	9485.38	2427.88	653.856
758.1	32139	14269.9	9466.63	2415.43	656.863
758.2	32063.5	14257	9447.62	2404.85	660.083
758.3	31983.9	14247	9428.53	2396.16	663.473
758.4	31900.2	14240.2	9409.57	2389.27	667.031
758.5	31812.9	14236.6	9390.93	2383.96	670.696
758.6	31722.3	14236.1	9372.86	2379.99	674.469
758.7	31628.4	14238.7	9355.51	2377.34	678.496
758.8	31531.8	14244.5	9339.18	2376.1	682.775
758.9	31432.9	14253.3	9324.09	2376.32	687.254
759	31331.8	14265.5	9310.21	2378.05	691.996
759.1	31228.9	14281.2	9297.53	2381.27	696.953
759.2	31124.7	14300.4	9286.1	2385.95	701.995
759.3	31019.5	14323.2	9275.97	2392.16	707.101
759.4	30913.7	14349.4	9267.19	2400.06	712.273
759.5	30807.5	14378.8	9259.71	2409.7	717.471
759.6	30701.7	14411.2	9253.63	2421.3	722.555
759.7	30596.5	14446.7	9248.87	2434.83	727.428
759.8	30492.6	14484.6	9245.23	2450.02	731.992
759.9	30390.4	14525	9242.65	2466.68	736.173
760	30290.6	14567.2	9241.11	2484.74	739.951
760.1	30193.8	14610.7	9240.57	2504.05	743.3
760.2	30100.2	14655	9240.96	2524.44	746.193
760.3	30010.4	14699.7	9242.19	2545.74	748.674
760.4	29924.7	14744.5	9244.06	2567.74	750.789
760.5	29843.6	14788.7	9246.24	2590.06	752.436
760.6	29767.4	14831.8	9248.63	2612.44	753.69
760.7	29696.2	14873.7	9250.99	2634.68	754.661
760.8	29630.2	14913.7	9253.12	2656.5	755.248
760.9	29569.6	14951.2	9254.82	2677.8	755.413
761	29514.2	14986	9255.93	2698.48	755.161
761.1	29464	15017.7	9256.32	2718.31	754.372
761.2	29418.7	15045.6	9255.74	2737.08	752.861
761.3	29378.4	15069.5	9253.98	2754.61	750.599
761.4	29342.8	15089.2	9251.02	2770.79	747.623
761.5	29311.4	15104	9246.74	2785.55	743.772
761.6	29283.9	15113.8	9241.02	2798.84	739.007
761.7	29260.1	15118	9233.76	2810.61	733.28
761.8	29239.4	15116.3	9224.9	2820.8	726.55
761.9	29221.1	15108.8	9214.35	2829.28	718.804
762	29204.6	15095.5	9202.06	2836.08	710.068
762.1	29189.8	15076.4	9187.98	2841.2	700.344
762.2	29176.2	15051.5	9172.1	2844.68	689.676
762.3	29163	15021.1	9154.46	2846.74	678.124
762.4	29149.7	14985.4	9135.02	2847.4	665.669
762.5	29135.6	14944.3	9113.68	2846.7	652.299
762.6	29120.5	14898.2	9090.67	2844.94	638.091
762.7	29104	14847.8	9066.11	2842.35	623.096
762.8	29085.8	14793.1	9040.17	2839.14	607.277
762.9	29065.7	14734.4	9012.97	2835.56	590.692
763	29043.2	14672.1	8984.64	2831.86	573.509
763.1	29018.1	14606.2	8955.27	2828.11	555.762
763.2	28990.2	14537	8924.98	2824.49	537.511
763.3	28959.2	14464.8	8893.87	2821.13	518.885
763.4	28925.4	14389.9	8862.09	2818.07	500
763.5	28888.8	14312.4	8829.77	2815.31	481.001
763.6	28849.7	14232.9	8796.98	2812.89	462.076
763.7	28808	14151.5	8763.88	2810.92	443.388
763.8	28763.8	14068.6	8730.45	2809.42	425.079
763.9	28717.1	13984.6	8696.86	2808.53	407.329
764	28667.8	13899.9	8663.2	2808.44	390.248
764.1	28615.7	13814.9	8629.52	2809.25	373.906
764.2	28560.9	13730.1	8595.93	2811.19	358.463
764.3	28503	13646	8562.53	2814.41	344.039
764.4	28441.9	13563	8529.36	2818.96	330.676
764.5	28377.2	13481.2	8496.49	2824.87	318.388
764.6	28308.3	13401.1	8464.01	2832.15	307.267
764.7	28235	13322.9	8431.88	2840.78	297.281
764.8	28157.5	13246.6	8400.14	2850.65	288.368
764.9	28075.3	13172.7	8368.79	2861.65	280.543
765	27988.3	13101.3	8337.85	2873.5	273.715
765.1	27896.4	13032.5	8307.36	2885.91	267.864
765.2	27799.2	12966.2	8277.32	2898.67	262.964
765.3	27696.7	12902.5	8247.81	2911.62	258.975
765.4	27588.6	12841.5	8218.84	2924.49	255.783
765.5	27475.2	12782.9	8190.38	2937.03	253.251
765.6	27356.2	12727.1	8162.57	2949.02	251.438
765.7	27231.7	12673.8	8135.5	2960.19	250.291
765.8	27101.8	12623.1	8109.27	2970.25	249.716
765.9	26966.5	12575.1	8084.05	2978.93	249.61
766	26825.8	12529.3	8059.81	2985.88	249.876
766.1	26680.5	12485.6	8036.58	2991.11	250.488
766.2	26531.2	12443.7	8014.21	2994.41	251.42
766.3	26378.6	12403.6	7992.55	2995.57	252.643
766.4	26223.4	12365	7971.58	2994.45	254.144
766.5	26066.4	12327.6	7951.23	2990.92	255.952
766.6	25908.9	12291.6	7931.46	2984.91	258.104
766.7	25751.1	12256.3	7911.97	2976.35	260.669
766.8	25594	12221.3	7892.45	2965.28	263.751
766.9	25438.4	12186.6	7872.53	2951.75	267.469
767	25284.8	12152.1	7851.97	2935.79	271.933
767.1	25133.7	12117.8	7830.64	2917.53	277.17
767.2	24985.8	12083.6	7808.44	2897.07	283.277
767.3	24841.4	12049.5	7785.35	2874.68	290.417
767.4	24700.9	12015.3	7761.22	2850.66	298.686
767.5	24564.4	11981.1	7735.93	2825.38	308.147
767.6	24431.9	11946.8	7709.33	2799.16	318.853
767.7	24303.6	11912.3	7681.26	2772.28	330.933
767.8	24179.4	11877.8	7651.72	2744.85	344.415
767.9	24059.2	11843	7620.94	2717.03	359.303
768	23943	11807.8	7588.95	2688.99	375.706
768.1	23830.6	11772.2	7555.66	2660.93	393.751
768.2	23722	11736	7521.03	2632.97	413.514
768.3	23617.2	11699.1	7485	2605.04	435.018
768.4	23516.1	11661.3	7447.62	2577.12	458.31
768.5	23418.6	11622.4	7409.24	2549.19	483.376
768.6	23324.7	11582.5	7370.18	2521.22	510.143
768.7	23234.4	11541.5	7330.73	2493.3	538.557
768.8	23147.7	11499.5	7291.16	2465.62	568.545
768.9	23064.4	11456.4	7251.69	2438.33	599.985
769	22984.9	11412.1	7212.58	2411.6	632.752
769.1	22909	11366.6	7174.2	2385.58	666.745
769.2	22836.9	11320	7136.86	2360.39	701.766
769.3	22768.7	11272.2	7100.89	2336.15	737.649
769.4	22704.5	11223.1	7066.52	2313	774.272
769.5	22644.5	11172.5	7033.89	2291.2	811.492
769.6	22588.8	11120.4	7002.95	2270.92	849.143
769.7	22537.9	11066.8	6973.61	2252.19	887.056
769.8	22492	11011.6	6945.91	2234.97	925.081
769.9	22451.3	10955	6919.91	2219.3	963.078
770	22416	10897	6895.58	2205.3	1000.95
770.1	22386.7	10838	6873.07	2193.27	1038.59
770.2	22362.8	10778	6852.34	2183.08	1075.83
770.3	22344	10717.3	6833.32	2174.77	1112.48
770.4	22330.1	10656	6815.96	2168.31	1148.35
770.5	22320.5	10594	6800.1	2163.58	1183.24
770.6	22314.5	10531.7	6785.7	2160.44	1216.97
770.7	22311.6	10469.4	6772.66	2158.92	1249.37
770.8	22310.6	10407.1	6760.87	2158.89	1280.05
770.9	22310.7	10344.8	6750.11	2160.16	1308.8
771	22311	10282.3	6740.19	2162.41	1335.4
771.1	22310.9	10219.6	6730.92	2165.3	1359.77
771.2	22309.7	10156.5	6722.12	2168.45	1381.77
771.3	22306.4	10092.8	6713.62	2171.38	1401.13
771.4	22300.4	10028.6	6705.34	2173.61	1417.6
771.5	22291	9963.98	6697.22	2174.72	1431.06
771.6	22277.7	9898.66	6689.17	2174.3	1441.42
771.7	22260.2	9832.71	6681.3	2172.09	1448.85
771.8	22237.7	9766.1	6673.57	2167.51	1453.16
771.9	22209.7	9698.88	6665.89	2160.2	1454.33
772	22175.7	9631.24	6658.13	2149.95	1452.35
772.1	22135.6	9563.42	6650.34	2136.69	1447.17
772.2	22089.2	9495.65	6642.56	2120.31	1438.7
772.3	22036.1	9428.12	6634.68	2100.62	1426.9
772.4	21976.3	9360.93	6626.53	2077.71	1411.81
772.5	21910	9294.36	6617.88	2051.76	1393.56
772.6	21837.5	9228.68	6608.26	2023.07	1372.2
772.7	21759.3	9164.26	6597.47	1992	1347.96
772.8	21675.7	9101.36	6585.18	1958.81	1320.94
772.9	21587	9040.24	6571.15	1923.76	1291.29
773	21493.8	8981.22	6555.12	1887.22	1259.26
773.1	21396.7	8924.61	6536.83	1849.61	1225.16
773.2	21296.1	8870.65	6515.98	1811.45	1189.31
773.3	21192.6	8819.74	6492.18	1773.33	1152.02
773.4	21086.7	8772.35	6465.28	1735.78	1113.57
773.5	20978.9	8728.89	6435.24	1699.29	1074.2
773.6	20869.6	8689.99	6402.04	1664.25	1034.18
773.7	20759.4	8655.42	6365.86	1631.01	993.793
773.8	20648.4	8625.32	6326.69	1600.1	953.305
773.9	20537.2	8599.88	6284.5	1572.12	912.929
774	20426	8578.94	6239.31	1547.5	872.855
774.1	20315.4	8562.38	6191.24	1526.56	833.19
774.2	20205.8	8549.97	6140.46	1509.47	794.026
774.3	20097.4	8541.35	6087.17	1496.14	755.462
774.4	19990.4	8536.2	6031.58	1487.08	717.635
774.5	19884.9	8534.02	5973.97	1482.55	680.75
774.6	19781.3	8534.26	5914.66	1482.8	644.932
774.7	19679.9	8536.36	5854.02	1487.74	610.267
774.8	19580.6	8539.76	5792.36	1497.3	576.756
774.9	19483.6	8544.06	5730.09	1511.59	544.589
775	19388.9	8548.9	5667.79	1530.39	513.866
775.1	19296.5	8553.82	5606.04	1553.51	484.666
775.2	19206.1	8558.3	5545.26	1580.76	456.992
775.3	19117.8	8562	5485.81	1611.87	430.947
775.4	19031.7	8564.44	5428.03	1646.81	406.689
775.5	18947.8	8565.3	5372.08	1685.24	384.25
775.6	18866.2	8564.41	5318.09	1726.81	363.654
775.7	18786.7	8561.78	5266.15	1771.17	344.878
775.8	18709.1	8557.12	5216.22	1818.01	327.696
775.9	18633.3	8550.06	5168.41	1867.4	312.169
776	18559.6	8540.38	5122.66	1919.24	298.284
776.1	18488	8527.89	5078.92	1973.29	286.042
776.2	18418.1	8512.53	5037.04	2029.12	275.408
776.3	18350	8494.64	4996.84	2086.31	266.328
776.4	18283.6	8474.07	4958.31	2144.66	258.92
776.5	18218.6	8450.8	4921.48	2203.87	253.22
776.6	18154.7	8424.81	4886.37	2263.52	249.244
776.7	18091.7	8396.28	4853.05	2323.26	247.041
776.8	18029.1	8365.27	4821.24	2382.61	246.564
776.9	17966.5	8331.85	4790.81	2441.08	247.953
777	17903.8	8296.22	4761.67	2498.17	251.333
777.1	17840.4	8258.6	4733.65	2553.44	256.735
777.2	17775.9	8219.16	4706.61	2606.63	264.042
777.3	17710.4	8178.16	4680.58	2657.59	273.067
777.4	17643.5	8135.57	4655.57	2705.88	283.762
777.5	17574.6	8091.38	4631.47	2751.08	296.035
777.6	17503.7	8045.72	4608.07	2792.82	309.783
777.7	17430.6	7998.69	4585.31	2830.85	324.814
777.8	17355.3	7950.59	4563.17	2865.08	340.998
777.9	17277.3	7901.56	4541.65	2895.14	358.318
778	17196.8	7851.62	4520.85	2920.82	376.601
778.1	17113.6	7800.92	4500.78	2941.95	395.707
778.2	17027.7	7749.71	4481.44	2958.33	415.611
778.3	16939.4	7698.03	4462.81	2970.01	436.237
778.4	16848.7	7646.22	4444.75	2977.17	457.578
778.5	16755.7	7594.54	4427.3	2979.53	479.55
778.6	16660.6	7543.29	4410.51	2977.23	501.959
778.7	16563.8	7492.75	4394.5	2970.41	524.651
778.8	16465.5	7443.1	4379.33	2959.49	547.448
778.9	16365.9	7394.59	4365.11	2944.56	570.161
779	16265.5	7347.43	4351.93	2925.77	592.601
779.1	16164.4	7301.77	4339.72	2903.48	614.589
779.2	16063.1	7257.75	4328.4	2878.04	635.973
779.3	15961.9	7215.62	4317.9	2849.81	656.559
779.4	15860.8	7175.49	4308.31	2819.27	676.09
779.5	15760.2	7137.64	4299.74	2786.55	694.378
779.6	15660.2	7102.07	4292.25	2751.95	711.377
779.7	15560.8	7068.73	4285.88	2715.79	727.041
779.8	15462.1	7037.45	4280.64	2678.37	741.367
779.9	15364.4	7008.41	4276.46	2639.92	754.437
780	15267.8	6981.69	4273.62	2600.58	766.203
780.1	15172.4	6957.29	4272.33	2560.6	776.64
780.2	15078.4	6935.12	4272.85	2520.28	785.677
780.3	14986.1	6915.04	4275.23	2479.93	793.382
780.4	14895.5	6896.39	4279.6	2439.8	799.874
780.5	14806.7	6879.13	4286.13	2400.1	805.132
780.6	14719.9	6863.12	4294.77	2361.01	809.146
780.7	14635.3	6848.29	4305.45	2322.68	811.94
780.8	14552.7	6834.32	4318.14	2285.17	813.539
780.9	14472.4	6821.06	4332.6	2248.64	814.028
781	14394.5	6808.19	4348.97	2213.18	813.342
781.1	14318.8	6795.34	4367.1	2178.84	811.492
781.2	14245.3	6782.12	4386.76	2145.57	808.555
781.3	14173.8	6768.29	4407.73	2113.3	804.627
781.4	14104.1	6753.49	4429.76	2081.82	799.8
781.5	14036.2	6737.35	4452.77	2051.08	794.028
781.6	13970.2	6719.58	4476.8	2021.11	787.256
781.7	13906.1	6699.68	4501.8	1991.99	779.506
781.8	13843.6	6677.38	4527.54	1963.74	770.866
781.9	13782.7	6652.64	4553.85	1936.36	761.339
782	13723.4	6625.14	4580.52	1909.98	750.839
782.1	13665.3	6594.73	4607.29	1884.64	739.473
782.2	13608.3	6561.28	4633.92	1860.5	727.327
782.3	13552.1	6524.64	4660.16	1837.72	714.398
782.4	13496.5	6484.99	4685.76	1816.31	700.793
782.5	13441.3	6442.1	4710.39	1796.3	686.566
782.6	13386.2	6395.89	4733.75	1777.66	671.898
782.7	13330.5	6346.48	4755.59	1760.19	656.962
782.8	13274.1	6293.94	4775.61	1743.73	641.915
782.9	13216.9	6238.52	4793.79	1728.19	626.952
783	13159	6180.23	4809.97	1713.61	612.295
783.1	13100.3	6119.16	4824.05	1699.92	598.124
783.2	13041.1	6055.58	4836.04	1687.01	584.597
783.3	12981.4	5989.9	4845.98	1674.85	571.907
783.4	12921.6	5922.42	4853.85	1663.35	560.24
783.5	12861.5	5853.4	4859.42	1652.64	549.838
783.6	12801.7	5783.24	4862.65	1642.79	540.846
783.7	12742.7	5712.37	4863.51	1633.88	533.36
783.8	12684.7	5641.36	4862	1625.99	527.522
783.9	12628.2	5570.77	4858.13	1619.04	523.375
784	12573.2	5500.91	4851.87	1612.92	520.903
784.1	12520.1	5432.34	4842.9	1607.52	520.225
784.2	12468.9	5365.35	4831.08	1602.71	521.397
784.3	12420	5300.23	4816.34	1598.3	524.417
784.4	12373.2	5237.2	4798.91	1594.17	529.084
784.5	12329.2	5176.49	4778.94	1590.16	535.256
784.6	12288.3	5118.45	4756.55	1586.19	542.823
784.7	12250.6	5063.14	4731.95	1582.14	551.607
784.8	12216.3	5010.55	4705.34	1577.89	561.379
784.9	12185.3	4960.65	4676.96	1573.52	571.931
785	12157.4	4913.26	4647.28	1569.02	583.036
785.1	12133.1	4868.55	4616.49	1564.42	594.53
785.2	12112.4	4826.66	4584.99	1559.77	606.157
785.3	12095.3	4787.64	4553.19	1555.05	617.679
785.4	12081.4	4751.47	4521.45	1550.22	628.918
785.5	12070.3	4718.08	4489.96	1545.43	639.796
785.6	12061.5	4687.69	4458.9	1540.69	650.21
785.7	12054.9	4660.31	4428.47	1536.06	660.101
785.8	12049.9	4635.95	4399	1531.57	669.416
785.9	12046.3	4614.4	4370.78	1527.18	678.156
786	12043.7	4595.39	4343.99	1522.83	686.37
786.1	12041.8	4578.91	4318.92	1518.56	694.029
786.2	12040.2	4564.75	4295.69	1514.27	701.128
786.3	12038.6	4552.73	4274.45	1509.93	707.717
786.4	12036.7	4542.64	4255.18	1505.43	713.869
786.5	12034.3	4534.26	4237.84	1500.69	719.636
786.6	12031.4	4527.58	4222.63	1495.65	724.994
786.7	12027.8	4522.47	4209.54	1490.24	729.862
786.8	12023.5	4518.82	4198.36	1484.41	734.22
786.9	12018.5	4516.62	4188.87	1478.1	738.042
787	12012.3	4515.74	4180.59	1471.22	741.267
787.1	12004.5	4516.2	4173.19	1463.65	743.833
787.2	11994.8	4518.03	4166.33	1455.36	745.767
787.3	11983.2	4521.16	4159.55	1446.2	747.03
787.4	11969.1	4525.38	4152.54	1436.08	747.546
787.5	11952.6	4530.48	4145.07	1425.01	747.352
787.6	11933.5	4536.41	4136.87	1412.79	746.383
787.7	11911.3	4543.04	4127.45	1399.41	744.616
787.8	11885.4	4550.24	4116.46	1384.88	741.996
787.9	11856	4557.83	4103.78	1369.14	738.455
788	11822.9	4565.59	4089.5	1352.34	733.983
788.1	11786	4573.41	4073.28	1334.51	728.438
788.2	11745.1	4581.3	4055.2	1315.72	721.676
788.3	11700.1	4589.23	4035.29	1296.27	713.642
788.4	11651	4597.37	4013.51	1276.39	704.427
788.5	11597.6	4605.79	3989.93	1256.32	694.187
788.6	11539.6	4614.52	3964.58	1236.46	682.999
788.7	11476.7	4623.49	3937.49	1217.13	670.992
788.8	11408.7	4632.62	3909	1198.69	658.365
788.9	11335.6	4641.83	3879.36	1181.58	645.305
789	11257.9	4651.08	3848.78	1165.94	632.037
789.1	11175.1	4660.3	3817.46	1152.26	618.893
789.2	11087.2	4669.37	3785.56	1140.97	606.111
789.3	10994.5	4678.21	3753.29	1132.39	593.9
789.4	10897.3	4686.6	3720.94	1126.8	582.383
789.5	10796.4	4694.33	3688.75	1124.24	571.627
789.6	10692.5	4701.39	3656.91	1124.57	561.715
789.7	10585.9	4707.73	3625.48	1127.93	552.812
789.8	10477.1	4713.43	3594.25	1134.17	545.007
789.9	10366.7	4718.65	3563.07	1143.09	538.385
790	10255.2	4723.44	3531.71	1154.36	532.883
790.1	10143.2	4727.97	3500.13	1167.72	528.536
790.2	10031.4	4732.25	3468.27	1182.84	525.393
790.3	9920.3	4736.39	3436	1199.38	523.442
790.4	9810.42	4740.48	3403.06	1216.95	522.629
790.5	9702.16	4744.62	3369.36	1235.29	522.847
790.6	9595.8	4748.93	3334.74	1254.26	523.954
790.7	9491.94	4753.57	3298.99	1273.64	525.83
790.8	9391.21	4758.52	3262.13	1293.27	528.301
790.9	9294.15	4763.9	3224.2	1312.91	531.182
791	9201.02	4769.9	3185.27	1332.28	534.286
791.1	9111.87	4776.63	3145.44	1351.26	537.465
791.2	9027.09	4784.31	3104.58	1369.63	540.607
791.3	8946.7	4793.17	3062.71	1387.21	543.578
791.4	8870.6	4803.52	3020.02	1403.95	546.315
791.5	8798.8	4815.67	2976.7	1419.72	548.769
791.6	8730.89	4829.81	2932.98	1434.37	550.831
791.7	8666.79	4846.21	2889.08	1447.8	552.443
791.8	8606.15	4865.17	2845.4	1460.01	553.688
791.9	8548.37	4886.74	2802.24	1471.15	554.563
792	8492.91	4910.77	2759.76	1481.45	555.031
792.1	8439.32	4937.04	2718.16	1491.2	555.144
792.2	8387.32	4965.55	2678	1500.7	554.936
792.3	8336.46	4996.14	2639.53	1510.17	554.404
792.4	8286.2	5028.54	2603.02	1519.74	553.575
792.5	8236.08	5062.21	2568.72	1529.6	552.487
792.6	8185.58	5096.72	2536.54	1539.82	551.216
792.7	8133.92	5131.85	2506.59	1550.37	549.848
792.8	8080.83	5167.12	2478.91	1561.18	548.512
792.9	8026.07	5202.31	2453.37	1572.03	547.349
793	7969.29	5237.33	2429.88	1582.62	546.495
793.1	7910.01	5271.97	2408.29	1592.76	546.022
793.2	7848.43	5305.91	2388.41	1601.98	545.857
793.3	7784.51	5338.75	2369.95	1609.97	546.029
793.4	7718.41	5370.16	2352.58	1616.53	546.587
793.5	7650.45	5400.04	2336	1621.51	547.547
793.6	7580.95	5428.27	2320.06	1624.94	548.895
793.7	7510.07	5454.55	2304.75	1626.8	550.659
793.8	7438.41	5478.57	2290.16	1627.04	552.722
793.9	7366.35	5499.97	2276.36	1625.75	555.064
794	7294.26	5518.33	2263.28	1623.02	557.712
794.1	7222.48	5533.49	2251.01	1619.03	560.757
794.2	7151.48	5545.32	2239.52	1613.83	564.188
794.3	7081.63	5553.94	2228.92	1607.51	568.056
794.4	7013.29	5559.44	2219.47	1600.16	572.417
794.5	6946.93	5561.83	2211.39	1591.83	577.314
794.6	6882.93	5561.18	2204.86	1582.52	582.804
794.7	6821.62	5557.56	2200.03	1572.21	588.979
794.8	6763.21	5551.07	2197	1560.89	595.86
794.9	6707.96	5542.03	2195.82	1548.67	603.426
795	6655.96	5530.63	2196.66	1535.75	611.619
795.1	6607.08	5517.09	2199.7	1522.5	620.42
795.2	6561.58	5501.44	2205.11	1509.04	629.828
795.3	6519.67	5483.51	2213.23	1495.58	639.818
795.4	6481.42	5463.23	2224.31	1482.29	650.366
795.5	6446.81	5440.6	2238.45	1469.33	661.453
795.6	6415.71	5415.72	2255.63	1456.88	672.992
795.7	6388	5388.65	2275.82	1445.08	684.865
795.8	6363.6	5359.4	2299.11	1434.05	697.083
795.9	6342.49	5327.99	2325.39	1423.73	709.604
796	6324.9	5294.46	2354.45	1414.08	722.499
796.1	6310.81	5258.96	2385.99	1405	735.847
796.2	6300.06	5221.7	2419.41	1396.34	749.644
796.3	6292.6	5182.79	2454.27	1388.02	763.941
796.4	6288.42	5142.3	2490.03	1379.93	778.754
796.5	6287.55	5100.4	2526.09	1371.96	794.068
796.6	6289.98	5057.29	2561.89	1363.99	809.823
796.7	6295.69	5013.15	2596.99	1355.95	825.885
796.8	6305	4968.02	2630.78	1347.8	842.092
796.9	6317.79	4922.17	2662.75	1339.58	858.253
797	6333.81	4875.74	2692.55	1331.31	874.042
797.1	6352.95	4828.84	2719.78	1323.06	889.182
797.2	6375.06	4781.56	2744.17	1314.88	903.461
797.3	6399.98	4734.14	2765.53	1306.87	916.738
797.4	6427.45	4686.84	2783.74	1299.16	928.888
797.5	6457.1	4639.87	2798.75	1291.9	939.813
797.6	6488.41	4593.31	2810.48	1285.3	949.513
797.7	6520.72	4547.3	2818.95	1279.56	958.049
797.8	6553.77	4502.05	2824.09	1274.94	965.364
797.9	6586.95	4457.67	2825.9	1271.56	971.528
798	6619.89	4414.44	2824.6	1269.55	976.678
798.1	6678.71	4381.18	2825.55	1260.69	975.279
798.2	6737.53	4347.91	2826.51	1251.84	973.881
798.3	6796.34	4314.65	2827.46	1242.98	972.483
798.4	6855.16	4281.38	2828.41	1234.13	971.085
798.5	6913.98	4248.12	2829.36	1225.28	969.687
798.6	6972.79	4214.85	2830.31	1216.42	968.288
798.7	7031.61	4181.59	2831.26	1207.57	966.89
798.8	7090.43	4148.32	2832.21	1198.71	965.492
798.9	7149.25	4115.06	2833.16	1189.86	964.094
799	7208.06	4081.79	2834.12	1181	962.696
799.1	7266.88	4048.53	2835.07	1172.15	961.297
799.2	7325.7	4015.26	2836.02	1163.29	959.899
799.3	7384.51	3981.99	2836.97	1154.44	958.501
799.4	7443.33	3948.73	2837.92	1145.58	957.103
799.5	7502.15	3915.46	2838.87	1136.73	955.705
799.6	7560.97	3882.2	2839.82	1127.87	954.306
799.7	7619.78	3848.93	2840.77	1119.02	952.908
[truncated: 3 more rows]

## Sheet: Fig. 2c
	CDs	Mn@CDs-12.5	Mn@CDs-25	Mn@CDs-50	Mn@CDs-100
Wavelength (nm)	Absorbance	Absorbance	Absorbance	Absorbance	Absorbance
800	0.01054	0.00561	0.00682	0.01301	-0.02117
799	0.00786	0.00292	0.00472	0.01011	-0.01497
798	0.00613	0.00132	0.00344	0.009	-0.01483
797	0.00602	0.001	0.00311	0.00927	-0.01317
796	0.00651	0.00076	0.00281	0.00899	-0.01361
795	0.00689	0.00126	0.00343	0.00905	-0.01253
794	0.00651	0.00202	0.00442	0.00977	-0.01186
793	0.00646	0.00177	0.00432	0.00995	-0.01254
792	0.00746	0.00103	0.00382	0.01012	-0.01223
791	0.00807	0.00106	0.00389	0.01119	-0.01147
790	0.00761	0.00126	0.00433	0.01195	-0.01106
789	0.00705	0.00097	0.00474	0.01206	-0.01246
788	0.00639	0.00118	0.00501	0.01251	-0.01179
787	0.00554	0.00199	0.00505	0.01294	-0.01064
786	0.00548	0.00249	0.00482	0.01305	-0.00929
785	0.00601	0.00251	0.00463	0.01341	-0.00977
784	0.00619	0.00253	0.0045	0.01359	-0.00919
783	0.00609	0.00251	0.00466	0.01364	-0.00753
782	0.00609	0.00188	0.00493	0.01422	-0.00859
781	0.00675	0.00157	0.00509	0.01517	-0.00819
780	0.0079	0.00216	0.00521	0.01595	-0.00841
779	0.0084	0.00221	0.00516	0.01624	-0.00829
778	0.00846	0.0018	0.00498	0.01634	-0.0069
777	0.00841	0.00178	0.00484	0.01653	-0.00654
776	0.00786	0.00179	0.0052	0.01679	-0.00632
775	0.0075	0.00201	0.00591	0.01725	-0.00665
774	0.00768	0.0027	0.00651	0.0183	-0.0066
773	0.00765	0.0033	0.00693	0.01917	-0.00671
772	0.00757	0.00344	0.00692	0.01946	-0.00568
771	0.0076	0.00297	0.00672	0.01993	-0.00487
770	0.0076	0.00258	0.00692	0.02075	-0.00547
769	0.00793	0.00284	0.00722	0.02153	-0.00496
768	0.00824	0.00337	0.00774	0.02235	-0.00445
767	0.00872	0.00386	0.00868	0.02336	-0.00485
766	0.00939	0.00411	0.00918	0.02408	-0.00411
765	0.00958	0.00422	0.00941	0.02481	-0.00336
764	0.00952	0.00456	0.00984	0.02569	-0.00338
763	0.0094	0.00481	0.00986	0.02619	-0.00357
762	0.00932	0.0048	0.00975	0.02676	-0.00097749
761	0.00946	0.00502	0.01017	0.02762	-0.0013
760	0.00972	0.00532	0.0107	0.0284	-0.00066349
759	0.00981	0.00554	0.01099	0.02936	0.00029451
758	0.00997	0.00585	0.01152	0.03049	0.00096351
757	0.01094	0.00617	0.01199	0.03122	0.00154
756	0.01158	0.00642	0.01247	0.03219	0.00208
755	0.01129	0.00658	0.01363	0.0338	0.00328
754	0.01122	0.00694	0.0147	0.03492	0.0042
753	0.01158	0.00731	0.01536	0.03565	0.00506
752	0.01238	0.00778	0.01584	0.03679	0.00559
751	0.01306	0.00857	0.01648	0.03843	0.00676
750	0.01316	0.0091	0.01748	0.04026	0.0081
749	0.0132	0.00902	0.01795	0.04127	0.00998
748	0.01337	0.00919	0.0188	0.04215	0.0108
747	0.01341	0.0096	0.0205	0.04403	0.01211
746	0.01314	0.00975	0.02187	0.04584	0.01309
745	0.01297	0.01026	0.023	0.04703	0.01495
744	0.01341	0.01081	0.02406	0.04835	0.01667
743	0.01414	0.01167	0.02548	0.05034	0.01859
742	0.0146	0.01283	0.02717	0.05237	0.01945
741	0.0148	0.01346	0.02845	0.05371	0.02099
740	0.01484	0.01371	0.02952	0.05489	0.02329
739	0.01485	0.01387	0.0307	0.05644	0.02493
738	0.01508	0.01447	0.03218	0.05815	0.0269
737	0.01527	0.01543	0.03385	0.05997	0.02865
736	0.0151	0.01632	0.03559	0.06208	0.03056
735	0.01495	0.01719	0.03755	0.06435	0.03247
734	0.01524	0.01807	0.03944	0.06636	0.03409
733	0.01589	0.01889	0.04132	0.06848	0.03674
732	0.01661	0.01969	0.0433	0.0707	0.0391
731	0.01677	0.02035	0.04491	0.07273	0.04155
730	0.01657	0.02097	0.04686	0.075	0.04387
729	0.01692	0.02187	0.04944	0.07773	0.04661
728	0.01728	0.02283	0.05187	0.08072	0.04964
727	0.01715	0.02374	0.05444	0.08353	0.05222
726	0.01719	0.02485	0.05736	0.08622	0.05539
725	0.01751	0.02605	0.06027	0.08912	0.05876
724	0.01818	0.02748	0.06329	0.09274	0.06214
723	0.01897	0.02907	0.06687	0.09692	0.06525
722	0.01928	0.03048	0.07091	0.10103	0.06917
721	0.01932	0.03198	0.07484	0.10527	0.07353
720	0.0197	0.03341	0.07899	0.10961	0.07806
719	0.02039	0.0349	0.0834	0.11423	0.08264
718	0.02076	0.03699	0.08787	0.11941	0.08739
717	0.02078	0.03913	0.09277	0.12488	0.09249
716	0.02135	0.04095	0.09782	0.13044	0.09742
715	0.02239	0.0431	0.10274	0.13595	0.10254
714	0.02296	0.04539	0.10797	0.14138	0.10733
713	0.02343	0.04769	0.11369	0.14708	0.11246
712	0.02436	0.05004	0.11935	0.15325	0.11771
711	0.02534	0.05215	0.12457	0.15945	0.12243
710	0.02645	0.05457	0.12973	0.16501	0.12693
709	0.02817	0.05736	0.13499	0.17003	0.12981
708	0.02983	0.06015	0.14005	0.17505	0.13208
707	0.03116	0.06299	0.14466	0.18002	0.13815
706	0.03289	0.06583	0.14891	0.18417	0.14109
705	0.03458	0.06858	0.15292	0.18739	0.14365
704	0.03623	0.07125	0.15654	0.19017	0.14579
703	0.03825	0.07391	0.15946	0.19247	0.14684
702	0.04055	0.07666	0.16175	0.19396	0.1477
701	0.0433	0.07943	0.16386	0.19462	0.14724
700	0.0465	0.08231	0.16569	0.19492	0.1463
699	0.04987	0.08529	0.16683	0.19452	0.1453
698	0.05323	0.08846	0.16742	0.19292	0.14358
697	0.05668	0.09179	0.16766	0.19068	0.14116
696	0.06051	0.095	0.16727	0.18818	0.13797
695	0.06459	0.09841	0.16652	0.18543	0.13434
694	0.06868	0.10204	0.16582	0.18198	0.1306
693	0.07325	0.1057	0.16505	0.17794	0.12622
692	0.07864	0.10996	0.16425	0.17377	0.1216
691	0.0843	0.11457	0.16334	0.16941	0.11717
690	0.0898	0.11882	0.16212	0.16482	0.11262
689	0.09562	0.12306	0.16078	0.16003	0.10777
688	0.10168	0.12788	0.15996	0.15547	0.10282
687	0.10797	0.1328	0.15937	0.15091	0.09761
686	0.11469	0.13778	0.15868	0.14634	0.09294
685	0.12138	0.14317	0.15824	0.14206	0.08824
684	0.12775	0.14843	0.158	0.13803	0.08369
683	0.13382	0.15324	0.15785	0.13445	0.07948
682	0.13974	0.15788	0.15783	0.13118	0.07577
681	0.14518	0.16232	0.15803	0.12832	0.07224
680	0.14969	0.16613	0.15824	0.12596	0.06875
679	0.15327	0.1692	0.15826	0.12383	0.06613
678	0.15592	0.17156	0.15815	0.12201	0.06333
677	0.15737	0.17332	0.15792	0.12062	0.06078
676	0.15743	0.17429	0.15741	0.11954	0.05864
675	0.15634	0.17445	0.15661	0.11874	0.05647
674	0.15406	0.17386	0.15578	0.11816	0.0545
673	0.15037	0.17228	0.15493	0.1179	0.05282
672	0.14554	0.16983	0.15359	0.11794	0.05153
671	0.13975	0.16695	0.15185	0.11826	0.04983
670	0.13298	0.16386	0.15027	0.11916	0.04834
669	0.12562	0.16039	0.14875	0.12029	0.04734
668	0.11804	0.15687	0.14722	0.12147	0.04612
667	0.11064	0.15336	0.14584	0.1227	0.04501
666	0.1034	0.14977	0.14464	0.12395	0.04395
665	0.09634	0.14697	0.14415	0.1257	0.04311
664	0.09002	0.14508	0.14416	0.12753	0.04263
663	0.08433	0.14348	0.14439	0.12928	0.04197
662	0.07926	0.14248	0.14539	0.13146	0.04133
661	0.07525	0.14229	0.14692	0.13373	0.0403
660	0.07237	0.14271	0.14873	0.13588	0.03972
659	0.07015	0.14393	0.15108	0.1382	0.03923
658	0.06833	0.14551	0.15381	0.14046	0.03841
657	0.0672	0.14726	0.15669	0.14231	0.03787
656	0.06669	0.14953	0.15953	0.14394	0.0375
655	0.06661	0.15176	0.16228	0.14543	0.03701
654	0.06705	0.15373	0.16485	0.1466	0.03636
653	0.06779	0.15582	0.16734	0.14759	0.03589
652	0.06865	0.15806	0.1701	0.1484	0.03571
651	0.06976	0.16022	0.17244	0.14895	0.03529
650	0.0711	0.16218	0.17427	0.14916	0.0349
649	0.07244	0.16375	0.17583	0.14873	0.03471
648	0.07407	0.16501	0.17703	0.14782	0.03446
647	0.0762	0.1663	0.17817	0.14706	0.03382
646	0.07837	0.16712	0.17863	0.14586	0.03328
645	0.08019	0.16746	0.17819	0.14381	0.03302
644	0.08202	0.16766	0.17752	0.14146	0.03252
643	0.08425	0.16743	0.17628	0.13878	0.03191
642	0.08648	0.16695	0.17448	0.13592	0.03141
641	0.08857	0.16633	0.17266	0.13305	0.03101
640	0.09075	0.16535	0.17066	0.12987	0.03053
639	0.09303	0.16443	0.16841	0.1265	0.02984
638	0.0954	0.16398	0.16617	0.12344	0.02944
637	0.09799	0.16334	0.16382	0.12045	0.02896
636	0.10086	0.16246	0.1614	0.11736	0.02837
635	0.10365	0.16211	0.15916	0.11434	0.0283
634	0.10667	0.16214	0.15702	0.11117	0.02795
633	0.11011	0.16196	0.15478	0.10799	0.02773
632	0.11364	0.16161	0.15264	0.10503	0.02755
631	0.11719	0.16151	0.15087	0.10236	0.02712
630	0.12018	0.16163	0.14912	0.10002	0.02664
629	0.12221	0.16121	0.14697	0.09764	0.02643
628	0.12347	0.16	0.14469	0.09522	0.02614
627	0.12388	0.15814	0.14233	0.09301	0.02589
626	0.12317	0.15531	0.13922	0.09086	0.02598
625	0.12123	0.15192	0.13565	0.08913	0.02601
624	0.11838	0.14791	0.13205	0.08786	0.02622
623	0.11483	0.14271	0.12808	0.08636	0.02628
622	0.11069	0.1376	0.12419	0.08497	0.02624
621	0.10643	0.13287	0.12061	0.08382	0.0266
620	0.10216	0.12793	0.11703	0.0826	0.02681
619	0.09806	0.12326	0.1137	0.08165	0.02713
618	0.09446	0.11925	0.11077	0.0809	0.02724
617	0.09133	0.11585	0.10823	0.0801	0.02735
616	0.08875	0.11278	0.10606	0.07919	0.02721
615	0.08695	0.11019	0.10413	0.0784	0.02711
614	0.08556	0.10821	0.10259	0.07779	0.02713
613	0.08438	0.1066	0.10126	0.07708	0.02727
612	0.08381	0.10553	0.10005	0.07633	0.02729
611	0.08381	0.1049	0.09934	0.07571	0.02708
610	0.08408	0.10443	0.09877	0.07503	0.02676
609	0.08448	0.10416	0.09827	0.07423	0.02646
608	0.08503	0.10435	0.09812	0.07358	0.02629
607	0.08582	0.10496	0.09807	0.07297	0.02595
606	0.08681	0.10535	0.09798	0.07226	0.02557
605	0.08768	0.10531	0.0977	0.07147	0.02515
604	0.08795	0.10494	0.09729	0.07071	0.02477
603	0.0874	0.10409	0.09667	0.07007	0.02414
602	0.08628	0.10248	0.09538	0.06938	0.02375
601	0.08511	0.10063	0.09385	0.06869	0.02343
600	0.08331	0.0986	0.0922	0.06777	0.02283
599	0.08047	0.09581	0.08999	0.06651	0.02236
598	0.07753	0.09264	0.08751	0.06539	0.02194
597	0.07483	0.08922	0.08495	0.06433	0.02136
596	0.07239	0.08589	0.08261	0.06352	0.02098
595	0.0702	0.08312	0.0806	0.06287	0.02036
594	0.06782	0.08052	0.0785	0.06186	0.0197
593	0.06538	0.07773	0.07627	0.06061	0.01906
592	0.06347	0.07508	0.07432	0.0597	0.01875
591	0.06209	0.07275	0.07254	0.05886	0.0184
590	0.06103	0.07076	0.07096	0.05783	0.01775
589	0.05995	0.06903	0.06966	0.05706	0.01755
588	0.05904	0.06723	0.06835	0.05623	0.01721
587	0.05856	0.06587	0.0671	0.05521	0.01687
586	0.05789	0.06456	0.06566	0.05426	0.01647
585	0.0573	0.06327	0.06435	0.05353	0.01613
584	0.05689	0.06246	0.06368	0.05302	0.01595
583	0.05624	0.06119	0.06281	0.05222	0.01568
582	0.05566	0.05966	0.06169	0.05138	0.01566
581	0.05533	0.05842	0.06065	0.05091	0.01528
580	0.05491	0.05711	0.0594	0.05031	0.01505
579	0.05413	0.0556	0.05816	0.04938	0.01486
578	0.05311	0.05415	0.05712	0.04867	0.01475
577	0.05204	0.05285	0.05603	0.04834	0.0149
576	0.0514	0.05156	0.05499	0.0482	0.01477
575	0.05091	0.05017	0.05405	0.04789	0.01497
574	0.04981	0.04875	0.05305	0.04746	0.01507
573	0.04865	0.04769	0.05244	0.04751	0.01532
572	0.04796	0.04696	0.05226	0.04789	0.01539
571	0.04716	0.04592	0.0517	0.04778	0.0156
570	0.04601	0.04456	0.05102	0.04758	0.01626
569	0.04511	0.04348	0.05082	0.04788	0.01662
568	0.04451	0.04253	0.05057	0.04809	0.01696
567	0.04396	0.04148	0.05017	0.04812	0.01717
566	0.04356	0.04074	0.05004	0.04842	0.01789
565	0.04303	0.04043	0.05027	0.04922	0.01853
564	0.04239	0.03996	0.05042	0.04985	0.01933
563	0.04184	0.03936	0.05035	0.05025	0.01991
562	0.04155	0.03896	0.05062	0.05096	0.02046
561	0.04147	0.03855	0.05103	0.05151	0.02118
560	0.04107	0.03804	0.05121	0.05196	0.02182
559	0.0405	0.03765	0.05152	0.05273	0.02241
558	0.0401	0.03737	0.05184	0.05352	0.02287
557	0.03997	0.03729	0.05205	0.05405	0.02371
556	0.03972	0.0372	0.05244	0.05444	0.02469
555	0.0393	0.03695	0.05304	0.05507	0.02488
554	0.03926	0.03669	0.05343	0.05589	0.02562
553	0.03936	0.03632	0.05343	0.05634	0.02602
552	0.03899	0.03591	0.05352	0.05666	0.02678
551	0.03846	0.03558	0.0537	0.05721	0.02707
550	0.03826	0.03532	0.0536	0.05753	0.0273
549	0.03806	0.03497	0.05348	0.05765	0.0275
548	0.03785	0.03465	0.05352	0.05791	0.02813
547	0.03767	0.03437	0.05341	0.05807	0.02782
546	0.03743	0.03404	0.05322	0.0581	0.02819
545	0.03751	0.03384	0.05312	0.05817	0.02815
544	0.03741	0.03348	0.05282	0.05799	0.02827
543	0.03701	0.03297	0.0524	0.05768	0.02813
542	0.03692	0.03268	0.05209	0.05746	0.02787
541	0.03708	0.03251	0.05179	0.0572	0.02762
540	0.03722	0.03237	0.05146	0.05699	0.02766
539	0.03712	0.03215	0.05093	0.0567	0.0272
538	0.03702	0.0318	0.05037	0.05635	0.02696
537	0.03709	0.03143	0.0499	0.05599	0.0263
536	0.03713	0.03125	0.04941	0.05558	0.02609
535	0.03725	0.03133	0.04904	0.05536	0.02585
534	0.03739	0.03114	0.04861	0.05509	0.02548
533	0.03732	0.03066	0.04798	0.05464	0.02478
532	0.03718	0.03039	0.04744	0.05427	0.02454
531	0.03727	0.03029	0.04703	0.05402	0.02437
530	0.03743	0.03001	0.04646	0.05366	0.02382
529	0.03747	0.02955	0.04566	0.05309	0.02316
528	0.03739	0.02918	0.04499	0.05259	0.02288
527	0.0373	0.02882	0.04444	0.05228	0.0228
526	0.03733	0.02845	0.04377	0.05203	0.02252
525	0.03749	0.02828	0.04317	0.05195	0.02245
524	0.03767	0.02818	0.0427	0.05203	0.02218
523	0.0376	0.02784	0.04221	0.05194	0.02186
522	0.03755	0.02752	0.04187	0.05194	0.02236
521	0.03771	0.02748	0.04161	0.05215	0.0221
520	0.03783	0.02745	0.04132	0.05231	0.02206
519	0.03789	0.02714	0.04093	0.05243	0.02186
518	0.03798	0.02687	0.04043	0.05265	0.02248
517	0.03842	0.02715	0.04045	0.05341	0.02238
516	0.0388	0.02727	0.04063	0.05435	0.02259
515	0.03859	0.02682	0.04021	0.05481	0.02271
514	0.0385	0.02651	0.03975	0.0552	0.02331
513	0.0389	0.02668	0.03979	0.05621	0.02412
512	0.03926	0.02688	0.03996	0.05744	0.02407
511	0.03955	0.02701	0.04017	0.05865	0.02481
510	0.03976	0.0269	0.0402	0.05983	0.02565
509	0.04005	0.02683	0.04008	0.06105	0.02597
508	0.04061	0.02724	0.04035	0.06262	0.02627
507	0.04095	0.02758	0.04067	0.06416	0.02732
506	0.04128	0.02753	0.04089	0.06557	0.02891
505	0.04164	0.0275	0.04117	0.06711	0.02923
504	0.0419	0.02766	0.04125	0.06868	0.03059
503	0.04238	0.0279	0.04138	0.07027	0.03137
502	0.04296	0.02813	0.04181	0.07193	0.03256
501	0.04332	0.02834	0.04219	0.07355	0.03357
500	0.04355	0.02857	0.04267	0.07514	0.03449
499	0.0439	0.02893	0.04331	0.07693	0.0351
498	0.04426	0.02928	0.04372	0.07868	0.03645
497	0.04452	0.02946	0.04403	0.08013	0.03791
496	0.04492	0.02966	0.04447	0.08164	0.03904
495	0.04549	0.03001	0.04504	0.08328	0.03994
494	0.046	0.03038	0.04566	0.08491	0.04145
493	0.04639	0.03064	0.04621	0.08642	0.04285
492	0.04685	0.03102	0.04692	0.08803	0.04453
491	0.04739	0.0317	0.04806	0.09008	0.04615
490	0.04799	0.03251	0.04934	0.09243	0.04789
489	0.04849	0.03303	0.05031	0.09456	0.0497
488	0.04889	0.03317	0.05101	0.09641	0.05216
487	0.04962	0.03375	0.05219	0.09872	0.05432
486	0.05035	0.03479	0.05375	0.10136	0.05617
485	0.05064	0.03543	0.05491	0.10349	0.05852
484	0.05106	0.03594	0.05605	0.10543	0.06112
483	0.05189	0.03686	0.05781	0.10788	0.06397
482	0.05266	0.03781	0.05972	0.11048	0.06591
481	0.05331	0.03858	0.06143	0.11295	0.06833
480	0.05404	0.03966	0.06343	0.11572	0.07111
479	0.0547	0.04098	0.06573	0.11874	0.07271
478	0.05528	0.04205	0.06794	0.12169	0.07578
477	0.05598	0.04314	0.07028	0.12497	0.07948
476	0.0567	0.04451	0.07292	0.12875	0.08221
475	0.0574	0.04601	0.0757	0.13276	0.08574
474	0.05822	0.04753	0.07862	0.13692	0.08985
473	0.05902	0.04922	0.0819	0.14159	0.09357
472	0.05982	0.05102	0.08546	0.14669	0.09775
471	0.06067	0.05284	0.08901	0.15193	0.10306
470	0.06141	0.05495	0.09293	0.15768	0.10751
469	0.06205	0.05724	0.09731	0.16384	0.11263
468	0.06285	0.05959	0.1019	0.17014	0.11825
467	0.06372	0.062	0.10666	0.17664	0.1235
466	0.0646	0.06449	0.11166	0.18333	0.12664
465	0.06567	0.06739	0.11742	0.19076	0.13668
464	0.06666	0.0707	0.12388	0.19885	0.14281
463	0.06763	0.07427	0.13065	0.2072	0.15021
462	0.06882	0.07816	0.13791	0.21608	0.15777
461	0.07002	0.08235	0.14569	0.22552	0.16551
460	0.07123	0.08668	0.15379	0.23521	0.17396
459	0.07248	0.09135	0.16242	0.24544	0.1825
458	0.07374	0.09661	0.17192	0.2566	0.19139
457	0.07505	0.10217	0.18183	0.26816	0.19958
456	0.07648	0.10803	0.19197	0.27982	0.20807
455	0.07784	0.1143	0.20234	0.29168	0.21654
454	0.07915	0.12071	0.2127	0.30349	0.22476
453	0.08073	0.1274	0.22302	0.31516	0.23147
452	0.08245	0.13469	0.23336	0.32672	0.23761
451	0.08417	0.14254	0.24381	0.33816	0.24387
450	0.08615	0.15082	0.2541	0.34914	0.24841
449	0.0883	0.15963	0.26425	0.35967	0.25242
448	0.09052	0.1691	0.27435	0.36982	0.25486
447	0.09308	0.17939	0.28445	0.37951	0.25557
446	0.09587	0.19062	0.29476	0.38897	0.2554
445	0.09876	0.20276	0.30525	0.39834	0.25328
444	0.1021	0.21606	0.3162	0.40771	0.25134
443	0.10606	0.23057	0.32787	0.41727	0.24944
442	0.11045	0.24629	0.34036	0.4271	0.24548
441	0.11536	0.2632	0.35388	0.43739	0.24169
440	0.12084	0.2812	0.36842	0.44819	0.23767
439	0.12685	0.30064	0.38436	0.45986	0.23202
438	0.13368	0.32182	0.40219	0.47284	0.22736
437	0.1415	0.34448	0.42185	0.48697	0.22182
436	0.15028	0.36821	0.44291	0.50179	0.21603
435	0.15981	0.39239	0.46455	0.51614	0.21084
434	0.1706	0.41703	0.48665	0.52957	0.20583
433	0.18328	0.44202	0.50909	0.54179	0.20034
432	0.1975	0.46625	0.53021	0.55091	0.19537
431	0.2135	0.48914	0.54904	0.5558	0.18987
430	0.23171	0.51084	0.5655	0.55629	0.18516
429	0.25211	0.53066	0.57856	0.5516	0.17982
428	0.2742	0.54736	0.58694	0.54163	0.17456
427	0.29653	0.55986	0.59009	0.52753	0.16942
426	0.31888	0.56789	0.58793	0.50968	0.16456
425	0.34161	0.57183	0.5809	0.48866	0.15961
424	0.36366	0.57185	0.56973	0.46567	0.15451
423	0.3838	0.56929	0.55654	0.44286	0.14973
422	0.40124	0.56574	0.54354	0.42231	0.14519
421	0.41594	0.56152	0.53099	0.40371	0.14107
420	0.42722	0.55647	0.51872	0.38677	0.13708
419	0.43401	0.55012	0.50646	0.37175	0.13331
418	0.4361	0.54212	0.49393	0.35864	0.12934
417	0.43348	0.53227	0.48061	0.34676	0.12558
416	0.42712	0.52116	0.46676	0.33549	0.12208
415	0.41921	0.51043	0.45354	0.32497	0.11871
414	0.41193	0.50144	0.44187	0.31525	0.1164
413	0.40682	0.4952	0.4325	0.30658	0.11303
412	0.40363	0.49146	0.42519	0.29868	0.10968
411	0.40169	0.4895	0.41949	0.29136	0.10675
410	0.40094	0.48888	0.4153	0.28478	0.10433
409	0.40084	0.48928	0.41249	0.27894	0.10181
408	0.40032	0.48961	0.40988	0.27299	0.09901
407	0.39918	0.48936	0.40675	0.26656	0.09692
406	0.39827	0.48906	0.40404	0.26076	0.09574
405	0.39734	0.4881	0.40126	0.25524	0.09426
404	0.3956	0.48563	0.3972	0.24897	0.09272
403	0.39345	0.48169	0.39195	0.24209	0.09157
402	0.3912	0.47653	0.38593	0.23518	0.09027
401	0.38852	0.47025	0.37921	0.22849	0.08906
400	0.38527	0.46273	0.37154	0.22182	0.08851
399	0.38129	0.45405	0.36321	0.2154	0.08829
398	0.37639	0.4444	0.3545	0.20937	0.08805
397	0.37065	0.434	0.34522	0.20345	0.08807
396	0.36428	0.42308	0.33565	0.19769	0.08787
395	0.3581	0.41245	0.32652	0.19262	0.08773
394	0.35236	0.40225	0.31787	0.18829	0.08847
393	0.34665	0.39222	0.30959	0.18441	0.08933
392	0.34124	0.38282	0.30213	0.18105	0.09133
391	0.33623	0.37421	0.29561	0.17832	0.09271
390	0.33156	0.36631	0.28998	0.17641	0.09455
389	0.32695	0.35872	0.28487	0.17515	0.09545
388	0.32205	0.351	0.28005	0.1743	0.09706
387	0.31652	0.34292	0.27555	0.17396	0.10036
386	0.31022	0.33435	0.27122	0.17427	0.10253
385	0.30374	0.32585	0.26711	0.17489	0.10494
384	0.29732	0.31775	0.26321	0.17524	0.10788
383	0.29097	0.30985	0.25985	0.17608	0.11077
382	0.28499	0.30228	0.25719	0.17775	0.11408
381	0.27939	0.29527	0.2549	0.17946	0.11751
380	0.27379	0.28851	0.25288	0.18121	0.12122
379	0.26801	0.28169	0.25086	0.18302	0.12754
378	0.26198	0.2747	0.2486	0.18454	0.13294
377	0.25599	0.26784	0.24654	0.18619	0.13541
376	0.25	0.26114	0.24502	0.18835	0.14309
375	0.2436	0.25431	0.24355	0.19057	0.14568
374	0.23728	0.2477	0.24189	0.19267	0.14599
373	0.23122	0.2414	0.2402	0.19467	0.1493
372	0.22516	0.23534	0.23857	0.19658	0.15563
371	0.21947	0.22969	0.23709	0.19847	0.16098
370	0.21417	0.22433	0.23577	0.20037	0.16524
369	0.2092	0.21939	0.23467	0.20223	0.17
368	0.20459	0.21476	0.23365	0.20391	0.17081
367	0.2004	0.21056	0.23277	0.20549	0.17269
366	0.19666	0.20681	0.2321	0.20713	0.1777
365	0.19321	0.20321	0.23131	0.20867	0.1827
364	0.19009	0.20013	0.23065	0.21022	0.1821
363	0.18745	0.19745	0.23023	0.21176	0.1839
362	0.18515	0.19472	0.22971	0.21289	0.18588
361	0.18479	0.1896	0.22624	0.21084	0.18763
360	0.18442	0.18205	0.21975	0.20572	0.18759
359	0.17796	0.177	0.21601	0.20326	0.18619
358	0.17572	0.17487	0.21527	0.20369	0.19147
357	0.17423	0.17279	0.21441	0.20384	0.19174
356	0.17303	0.17061	0.21339	0.20365	0.18756
355	0.1718	0.16871	0.2123	0.20353	0.1866
354	0.17059	0.16651	0.2107	0.20296	0.18651
353	0.16955	0.16422	0.20896	0.20199	0.18651
352	0.16885	0.16251	0.2074	0.20119	0.18627
351	0.16825	0.16089	0.20572	0.19999	0.18818
350	0.16747	0.15913	0.20406	0.19849	0.18749
349	0.16679	0.15755	0.20262	0.19737	0.18093
348	0.16631	0.15619	0.20108	0.19602	0.1788
347	0.16575	0.15501	0.19925	0.19438	0.17924
346	0.16528	0.15388	0.19754	0.19313	0.17945
345	0.16513	0.15271	0.19592	0.19193	0.17643
344	0.16489	0.15137	0.19402	0.1903	0.17288
343	0.16424	0.14991	0.19222	0.18897	0.17439
342	0.1637	0.14887	0.19084	0.18823	0.16972
341	0.16348	0.14814	0.18979	0.18735	0.1646
340	0.1632	0.14702	0.18884	0.18603	0.1647
339	0.16237	0.14554	0.18743	0.18482	0.16613
338	0.16122	0.14442	0.18609	0.18423	0.16792
337	0.16046	0.14368	0.18547	0.1838	0.16426
336	0.15997	0.14259	0.18468	0.18299	0.1561
335	0.15926	0.14151	0.18372	0.18212	0.15437
334	0.15842	0.1407	0.18288	0.18154	0.16091
333	0.15807	0.13978	0.18168	0.18097	0.1614
332	0.15787	0.13897	0.18054	0.18033	0.15746
331	0.15717	0.13831	0.17973	0.17986	0.15939
330	0.15623	0.13756	0.17906	0.17944	0.1598
329	0.15536	0.13688	0.17837	0.17898	0.15668
328	0.15477	0.13633	0.17778	0.17873	0.14991
327	0.15449	0.13584	0.17739	0.17849	0.15166
326	0.15418	0.13541	0.17694	0.1781	0.15744
325	0.1536	0.13487	0.17622	0.17772	0.15323
324	0.1531	0.13421	0.17548	0.17743	0.15375
323	0.15281	0.13372	0.17508	0.17737	0.15606
322	0.15252	0.13316	0.1744	0.17716	0.15087
321	0.15208	0.1325	0.17356	0.17682	0.14656
320	0.15136	0.13207	0.17303	0.17663	0.14914
319	0.15086	0.13163	0.17254	0.17662	0.13652
318	0.15089	0.13112	0.17219	0.17673	0.12458
317	0.15082	0.13056	0.17166	0.17675	0.1236
316	0.15048	0.13014	0.17091	0.17664	0.12403
315	0.15033	0.12989	0.17023	0.1763	0.12337
314	0.15024	0.12963	0.16966	0.1759	0.1227
313	0.14983	0.12945	0.16916	0.17594	0.12342
312	0.1495	0.12912	0.16862	0.17624	0.12274
311	0.14952	0.12883	0.16813	0.17634	0.12093
310	0.14957	0.12847	0.16741	0.1761	0.12099
309	0.14944	0.12785	0.16663	0.17566	0.12065
308	0.1494	0.12768	0.16623	0.17554	0.11934
307	0.14956	0.12787	0.16594	0.17577	0.11994
306	0.14988	0.1279	0.16571	0.17591	0.12032
305	0.15032	0.12795	0.16553	0.17592	0.12027
304	0.15054	0.12819	0.16536	0.17591	0.12029
303	0.15067	0.1286	0.1653	0.17608	0.11751
302	0.15109	0.12908	0.16534	0.1764	0.11801
301	0.15067	0.13193	0.16826	0.17967	0.11774
300	0.15172	0.13749	0.17432	0.18632	0.11874
299	0.15374	0.14065	0.17757	0.18997	0.11878
298	0.15411	0.14071	0.17744	0.18979	0.11877
297	0.15472	0.141	0.17752	0.18964	0.1194
296	0.15587	0.14191	0.17824	0.19014	0.11871
295	0.15708	0.14287	0.17915	0.19075	0.11721
294	0.15818	0.1439	0.18009	0.19123	0.11643
293	0.15912	0.1449	0.18095	0.19166	0.11601
292	0.1601	0.14585	0.18169	0.192	0.11518
291	0.16138	0.14702	0.18256	0.19242	0.11668
290	0.16295	0.14861	0.18393	0.19328	0.11675
289	0.16448	0.15029	0.18555	0.19434	0.11666
288	0.16549	0.15137	0.18665	0.19484	0.11634
287	0.16645	0.15223	0.18751	0.19491	0.11608
286	0.16785	0.15351	0.18877	0.19539	0.11689
285	0.16928	0.15495	0.19016	0.19622	0.11756
284	0.17064	0.15646	0.19155	0.19689	0.1187
283	0.17229	0.15804	0.19286	0.19731	0.11733
282	0.1741	0.15934	0.19387	0.19751	0.11736
281	0.17583	0.16087	0.19502	0.19779	0.11597
280	0.17762	0.16273	0.19641	0.19816	0.11614
279	0.17959	0.16463	0.19791	0.19852	0.11512
278	0.18161	0.16657	0.19927	0.19874	0.11471
277	0.18354	0.16836	0.20032	0.19867	0.11328
276	0.1856	0.17032	0.2015	0.19875	0.11332
275	0.18785	0.17252	0.2028	0.19894	0.11304
274	0.19019	0.17468	0.20403	0.19904	0.11169
273	0.19237	0.17661	0.20509	0.19902	0.11069
272	0.19454	0.17805	0.2056	0.19844	0.11007
271	0.19702	0.17966	0.20621	0.19794	0.10931
270	0.19941	0.18185	0.20744	0.19814	0.10872
269	0.20176	0.18386	0.20868	0.19835	0.10717
268	0.20408	0.18538	0.20962	0.19823	0.10603
267	0.20584	0.18642	0.21009	0.19771	0.10676
266	0.20747	0.18736	0.21039	0.1973	0.10617
265	0.20944	0.18865	0.21105	0.19748	0.10578
264	0.21123	0.18991	0.21184	0.19787	0.10365
263	0.21284	0.19102	0.21268	0.1984	0.10504
262	0.21419	0.19172	0.21311	0.19863	0.1032
261	0.2151	0.19156	0.21262	0.19791	0.1019
260	0.21618	0.19118	0.21192	0.19691	0.10128
259	0.21761	0.19132	0.21169	0.19644	0.10111
258	0.21894	0.19161	0.21159	0.19614	0.09733
257	0.22011	0.1916	0.21118	0.19557	0.09769
256	0.22135	0.19155	0.21065	0.19507	0.09487
255	0.22247	0.19155	0.21032	0.19475	0.09568
254	0.22342	0.19144	0.20988	0.19426	0.09473
253	0.22454	0.1911	0.20899	0.19351	0.09422
252	0.22589	0.1906	0.20806	0.19273	0.09437
251	0.22711	0.19026	0.20739	0.19224	0.09358
250	0.22817	0.1904	0.20717	0.19228	0.09322
	0.22928	0.19069	0.20736	0.19248	0.09204
	0.23056	0.19078	0.20746	0.1926	0.08922
	0.23201	0.19085	0.20755	0.1927	0.08973
	0.23336	0.19074	0.2075	0.1927	0.08985
	0.23438	0.1908	0.20763	0.1931	0.09054
	0.23532	0.1914	0.20843	0.19418	0.0905
	0.23668	0.19229	0.2096	0.19556	0.09092
	0.23834	0.19338	0.211	0.19717	0.09062
	0.23954	0.1941	0.21213	0.19851	0.09253
	0.24041	0.19492	0.21325	0.19988	0.09408
	0.24158	0.19638	0.21502	0.20174	0.09291
	0.24306	0.19794	0.21703	0.20388	0.09323
	0.24469	0.19966	0.21904	0.20619	0.09278
	0.24628	0.20127	0.22091	0.20815	0.09311
	0.24774	0.20286	0.22276	0.20997	0.09355
	0.24941	0.20486	0.22491	0.21208	0.09252
	0.25134	0.2069	0.22697	0.21406	0.094
	0.25332	0.20889	0.22905	0.21605	0.09133
	0.25546	0.2112	0.23147	0.21835	0.09044
	0.25769	0.21341	0.23377	0.22047	0.0893
	0.26007	0.21522	0.23582	0.22228	0.09292
	0.26266	0.21732	0.23835	0.22462	0.09098
	0.26517	0.21994	0.24149	0.22762	0.08965
	0.26758	0.22271	0.24473	0.23074	0.08974
	0.26991	0.22551	0.24808	0.23395	0.08957
	0.27208	0.22825	0.25161	0.23745	0.0897
	0.27436	0.23125	0.25545	0.24138	0.08966
	0.27681	0.23466	0.2597	0.24565	0.09337
	0.2793	0.23825	0.26429	0.25033	0.09159
	0.28174	0.24174	0.26877	0.25505	0.09168
	0.28445	0.24529	0.27305	0.25965	0.0855
	0.28795	0.24997	0.27845	0.26526	0.08941
	0.29204	0.2557	0.28522	0.27205	0.09004
	0.2962	0.26143	0.29204	0.27888	0.08786
	0.30057	0.26684	0.29834	0.28532	0.09395
	0.30519	0.27198	0.30443	0.29148	0.09212
	0.31023	0.27775	0.31118	0.2982	0.09183
	0.3164	0.28455	0.31877	0.30592	0.09118
	0.32352	0.29157	0.32659	0.31404	0.0908
	0.33101	0.29816	0.33408	0.32182	0.09434
	0.33861	0.30363	0.34064	0.32851	0.09362
	0.34671	0.30878	0.34691	0.33491	0.09348
	0.35596	0.31474	0.35379	0.3421	0.09028
	0.36616	0.32118	0.36109	0.34973	0.095
	0.37678	0.32768	0.36831	0.35731	0.09726
	0.38791	0.33373	0.37498	0.36433	0.09887
	0.39992	0.33955	0.38151	0.37098	0.10865
	0.41245	0.34599	0.3884	0.37797	0.1079
	0.42532	0.35349	0.39592	0.38574	0.11127
	0.43552	0.35988	0.40223	0.39234	0.11732

## Sheet: Fig. 2d
The UV-vis absorption spectra of CDs (final concentration of 10 μg/mL) in water, 1 mM HCl, and 1mM NaOH
In water		In 1 mM HCl		In 1 mM NaOH
Wavelength (nm)	Absorbance	Wavelength (nm)	Absorbance	Wavelength (nm)	Absorbance
800	0.01054	800	0.01401	800	0.02915
799	0.00786	799	0.0108	799	0.0269
798	0.00613	798	0.00904	798	0.02554
797	0.00602	797	0.00929	797	0.02541
796	0.00651	796	0.00927	796	0.02526
795	0.00689	795	0.00965	795	0.02532
794	0.00651	794	0.01019	794	0.02551
793	0.00646	793	0.01009	793	0.02566
792	0.00746	792	0.01051	792	0.02614
791	0.00807	791	0.01064	791	0.0264
790	0.00761	790	0.01033	790	0.026
789	0.00705	789	0.0106	789	0.02563
788	0.00639	788	0.01058	788	0.02542
787	0.00554	787	0.01006	787	0.02509
786	0.00548	786	0.01007	786	0.02545
785	0.00601	785	0.01015	785	0.02641
784	0.00619	784	0.00961	784	0.02647
783	0.00609	783	0.00948	783	0.02588
782	0.00609	782	0.00977	782	0.02583
781	0.00675	781	0.01015	781	0.02627
780	0.0079	780	0.01108	780	0.02708
779	0.0084	779	0.01138	779	0.02707
778	0.00846	778	0.0111	778	0.02636
777	0.00841	777	0.01133	777	0.02666
776	0.00786	776	0.01127	776	0.027
775	0.0075	775	0.01094	775	0.02629
774	0.00768	774	0.01138	774	0.02608
773	0.00765	773	0.0119	773	0.02681
772	0.00757	772	0.01199	772	0.02732
771	0.0076	771	0.01204	771	0.02725
770	0.0076	770	0.01162	770	0.02697
769	0.00793	769	0.01127	769	0.02726
768	0.00824	768	0.01124	768	0.02719
767	0.00872	767	0.01187	767	0.02686
766	0.00939	766	0.01297	766	0.02715
765	0.00958	765	0.0132	765	0.02727
764	0.00952	764	0.01318	764	0.02746
763	0.0094	763	0.01308	763	0.02738
762	0.00932	762	0.0126	762	0.02686
761	0.00946	761	0.01266	761	0.02664
760	0.00972	760	0.01325	760	0.02698
759	0.00981	759	0.01351	759	0.02728
758	0.00997	758	0.0136	758	0.02702
757	0.01094	757	0.01417	757	0.02726
756	0.01158	756	0.01455	756	0.02788
755	0.01129	755	0.01436	755	0.02797
754	0.01122	754	0.01415	754	0.02744
753	0.01158	753	0.01471	753	0.02743
752	0.01238	752	0.01575	752	0.02829
751	0.01306	751	0.01608	751	0.02873
750	0.01316	750	0.01613	750	0.02858
749	0.0132	749	0.01638	749	0.02844
748	0.01337	748	0.01626	748	0.02845
747	0.01341	747	0.01566	747	0.02839
746	0.01314	746	0.01535	746	0.02826
745	0.01297	745	0.01562	745	0.02804
744	0.01341	744	0.01605	744	0.02817
743	0.01414	743	0.01677	743	0.02874
742	0.0146	742	0.01734	742	0.02906
741	0.0148	741	0.01732	741	0.02937
740	0.01484	740	0.01715	740	0.02956
739	0.01485	739	0.01748	739	0.02964
738	0.01508	738	0.01814	738	0.02976
737	0.01527	737	0.01817	737	0.02964
736	0.0151	736	0.01828	736	0.02962
735	0.01495	735	0.01901	735	0.02993
734	0.01524	734	0.01933	734	0.03028
733	0.01589	733	0.01942	733	0.03039
732	0.01661	732	0.01961	732	0.0303
731	0.01677	731	0.01957	731	0.03004
730	0.01657	730	0.01988	730	0.03009
729	0.01692	729	0.02069	729	0.03072
728	0.01728	728	0.02108	728	0.0311
727	0.01715	727	0.02089	727	0.03114
726	0.01719	726	0.02097	726	0.03113
725	0.01751	725	0.02145	725	0.03073
724	0.01818	724	0.02202	724	0.03077
723	0.01897	723	0.02276	723	0.03161
722	0.01928	722	0.02346	722	0.03203
721	0.01932	721	0.02395	721	0.03183
720	0.0197	720	0.02418	720	0.03158
719	0.02039	719	0.02433	719	0.03172
718	0.02076	718	0.02497	718	0.03213
717	0.02078	717	0.02578	717	0.03216
716	0.02135	716	0.02646	716	0.03232
715	0.02239	715	0.02737	715	0.03281
714	0.02296	714	0.02787	714	0.03298
713	0.02343	713	0.02817	713	0.03286
712	0.02436	712	0.02907	712	0.03295
711	0.02534	711	0.03002	711	0.03339
710	0.02645	710	0.03079	710	0.03356
709	0.02817	709	0.03182	709	0.03386
708	0.02983	708	0.0331	708	0.03457
707	0.03116	707	0.03422	707	0.03478
706	0.03289	706	0.03529	706	0.03465
705	0.03458	705	0.03647	705	0.03496
704	0.03623	704	0.03776	704	0.03535
703	0.03825	703	0.03918	703	0.0353
702	0.04055	702	0.04082	702	0.03561
701	0.0433	701	0.0426	701	0.03633
700	0.0465	700	0.04423	700	0.03676
699	0.04987	699	0.04612	699	0.03728
698	0.05323	698	0.04817	698	0.03781
697	0.05668	697	0.05016	697	0.03804
696	0.06051	696	0.05233	696	0.03849
695	0.06459	695	0.05414	695	0.03879
694	0.06868	694	0.05579	694	0.03868
693	0.07325	693	0.05783	693	0.03903
692	0.07864	692	0.06016	692	0.03979
691	0.0843	691	0.06245	691	0.04045
690	0.0898	690	0.06464	690	0.04089
689	0.09562	689	0.06694	689	0.04113
688	0.10168	688	0.06896	688	0.04154
687	0.10797	687	0.0711	687	0.04218
686	0.11469	686	0.07361	686	0.0429
685	0.12138	685	0.07585	685	0.04381
684	0.12775	684	0.07764	684	0.04469
683	0.13382	683	0.07922	683	0.04554
682	0.13974	682	0.08102	682	0.04664
681	0.14518	681	0.08269	681	0.04787
680	0.14969	680	0.08367	680	0.04914
679	0.15327	679	0.08427	679	0.05042
678	0.15592	678	0.08486	678	0.05165
677	0.15737	677	0.08509	677	0.05295
676	0.15743	676	0.08471	676	0.05453
675	0.15634	675	0.08412	675	0.05652
674	0.15406	674	0.08322	674	0.0586
673	0.15037	673	0.08184	673	0.0608
672	0.14554	672	0.08032	672	0.06341
671	0.13975	671	0.07856	671	0.06627
670	0.13298	670	0.0764	670	0.06933
669	0.12562	669	0.07414	669	0.07277
668	0.11804	668	0.07199	668	0.07655
667	0.11064	667	0.07001	667	0.08075
666	0.1034	666	0.06794	666	0.08507
665	0.09634	665	0.06588	665	0.08968
664	0.09002	664	0.06425	664	0.09487
663	0.08433	663	0.0626	663	0.10002
662	0.07926	662	0.06092	662	0.10512
661	0.07525	661	0.05976	661	0.11062
660	0.07237	660	0.05932	660	0.11613
659	0.07015	659	0.0592	659	0.12128
658	0.06833	658	0.05876	658	0.12612
657	0.0672	657	0.05827	657	0.13066
656	0.06669	656	0.05831	656	0.13504
655	0.06661	655	0.05899	655	0.13916
654	0.06705	654	0.05984	654	0.14323
653	0.06779	653	0.06044	653	0.14757
652	0.06865	652	0.06094	652	0.15173
651	0.06976	651	0.0615	651	0.15587
650	0.0711	650	0.06231	650	0.16075
649	0.07244	649	0.06345	649	0.16629
648	0.07407	648	0.06443	648	0.17223
647	0.0762	647	0.06529	647	0.17834
646	0.07837	646	0.06663	646	0.18428
645	0.08019	645	0.06788	645	0.18971
644	0.08202	644	0.06877	644	0.19438
643	0.08425	643	0.06988	643	0.19836
642	0.08648	642	0.07098	642	0.20166
641	0.08857	641	0.07187	641	0.20391
640	0.09075	640	0.07269	640	0.20487
639	0.09303	639	0.07351	639	0.20499
638	0.0954	638	0.07435	638	0.20466
637	0.09799	637	0.07542	637	0.2039
636	0.10086	636	0.07651	636	0.20259
635	0.10365	635	0.07718	635	0.20048
634	0.10667	634	0.07772	634	0.19755
633	0.11011	633	0.07828	633	0.19375
632	0.11364	632	0.07876	632	0.18901
631	0.11719	631	0.0796	631	0.18337
630	0.12018	630	0.08035	630	0.17637
629	0.12221	629	0.08042	629	0.16823
628	0.12347	628	0.08036	628	0.16002
627	0.12388	627	0.08038	627	0.15197
626	0.12317	626	0.08001	626	0.14392
625	0.12123	625	0.07904	625	0.13656
624	0.11838	624	0.07787	624	0.13028
623	0.11483	623	0.07675	623	0.12454
622	0.11069	622	0.07537	622	0.11924
621	0.10643	621	0.07387	621	0.11473
620	0.10216	620	0.07242	620	0.11086
619	0.09806	619	0.07102	619	0.10715
618	0.09446	618	0.07004	618	0.10397
617	0.09133	617	0.06937	617	0.10137
616	0.08875	616	0.0685	616	0.09872
615	0.08695	615	0.06802	615	0.09636
614	0.08556	614	0.06792	614	0.09451
613	0.08438	613	0.06745	613	0.09293
612	0.08381	612	0.06697	612	0.09165
611	0.08381	611	0.06684	611	0.09069
610	0.08408	610	0.06683	610	0.08993
609	0.08448	609	0.06668	609	0.08921
608	0.08503	608	0.06643	608	0.0885
607	0.08582	607	0.06635	607	0.0879
606	0.08681	606	0.06639	606	0.08761
605	0.08768	605	0.06622	605	0.08746
604	0.08795	604	0.06578	604	0.08717
603	0.0874	603	0.06507	603	0.08666
602	0.08628	602	0.06429	602	0.08623
601	0.08511	601	0.06389	601	0.08632
600	0.08331	600	0.06319	600	0.08639
599	0.08047	599	0.06159	599	0.0857
598	0.07753	598	0.06007	598	0.08517
597	0.07483	597	0.05896	597	0.08538
596	0.07239	596	0.05798	596	0.08586
595	0.0702	595	0.05731	595	0.08637
594	0.06782	594	0.05652	594	0.08656
593	0.06538	593	0.05525	593	0.08624
592	0.06347	592	0.05423	592	0.08607
591	0.06209	591	0.05372	591	0.08621
590	0.06103	590	0.05341	590	0.08626
589	0.05995	589	0.05275	589	0.08589
588	0.05904	588	0.05191	588	0.08536
587	0.05856	587	0.05143	587	0.08486
586	0.05789	586	0.05083	586	0.08415
585	0.0573	585	0.05036	585	0.08342
584	0.05689	584	0.05004	584	0.08244
583	0.05624	583	0.04945	583	0.08115
582	0.05566	582	0.04881	582	0.07994
581	0.05533	581	0.04846	581	0.07896
580	0.05491	580	0.04827	580	0.07809
579	0.05413	579	0.04764	579	0.07703
578	0.05311	578	0.04688	578	0.07583
577	0.05204	577	0.04632	577	0.0747
576	0.0514	576	0.0459	576	0.07396
575	0.05091	575	0.04568	575	0.07337
574	0.04981	574	0.04526	574	0.07226
573	0.04865	573	0.04455	573	0.07107
572	0.04796	572	0.04407	572	0.07029
571	0.04716	571	0.04374	571	0.06947
570	0.04601	570	0.04306	570	0.06857
569	0.04511	569	0.04262	569	0.06808
568	0.04451	568	0.0426	568	0.06783
567	0.04396	567	0.04239	567	0.06759
566	0.04356	566	0.0422	566	0.0674
565	0.04303	565	0.04195	565	0.06708
564	0.04239	564	0.04165	564	0.06682
563	0.04184	563	0.04157	563	0.0666
562	0.04155	562	0.0415	562	0.0664
561	0.04147	561	0.04139	561	0.06643
560	0.04107	560	0.04126	560	0.06608
559	0.0405	559	0.04099	559	0.0656
558	0.0401	558	0.0407	558	0.06561
557	0.03997	557	0.04039	557	0.06572
556	0.03972	556	0.04002	556	0.06568
555	0.0393	555	0.03993	555	0.06577
554	0.03926	554	0.04002	554	0.0661
553	0.03936	553	0.03997	553	0.06627
552	0.03899	552	0.03981	552	0.06601
551	0.03846	551	0.03944	551	0.06576
550	0.03826	550	0.03922	550	0.06586
549	0.03806	549	0.0394	549	0.06617
548	0.03785	548	0.03949	548	0.06653
547	0.03767	547	0.03941	547	0.06671
546	0.03743	546	0.03938	546	0.0667
545	0.03751	545	0.03955	545	0.06692
544	0.03741	544	0.03962	544	0.06713
543	0.03701	543	0.03942	543	0.06704
542	0.03692	542	0.03936	542	0.06715
541	0.03708	541	0.03947	541	0.0675
540	0.03722	540	0.03971	540	0.0678
539	0.03712	539	0.0398	539	0.06776
538	0.03702	538	0.03968	538	0.06766
537	0.03709	537	0.03965	537	0.06785
536	0.03713	536	0.03985	536	0.06808
535	0.03725	535	0.04021	535	0.06836
534	0.03739	534	0.04038	534	0.06854
533	0.03732	533	0.04027	533	0.06845
532	0.03718	532	0.04019	532	0.06837
531	0.03727	531	0.04029	531	0.06849
530	0.03743	530	0.04041	530	0.06869
529	0.03747	529	0.04044	529	0.06881
528	0.03739	528	0.04044	528	0.06886
527	0.0373	527	0.04051	527	0.06892
526	0.03733	526	0.04061	526	0.06911
525	0.03749	525	0.04068	525	0.06935
524	0.03767	524	0.04089	524	0.06951
523	0.0376	523	0.04102	523	0.06946
522	0.03755	522	0.04109	522	0.06961
521	0.03771	521	0.04141	521	0.07005
520	0.03783	520	0.04165	520	0.0704
519	0.03789	519	0.04169	519	0.07084
518	0.03798	518	0.04184	518	0.07109
517	0.03842	517	0.04229	517	0.07127
516	0.0388	516	0.04257	516	0.07164
515	0.03859	515	0.04248	515	0.07172
514	0.0385	514	0.04255	514	0.07181
513	0.0389	513	0.04284	513	0.07228
512	0.03926	512	0.04302	512	0.07266
511	0.03955	511	0.04346	511	0.07314
510	0.03976	510	0.04376	510	0.07362
509	0.04005	509	0.04377	509	0.07384
508	0.04061	508	0.04425	508	0.07431
507	0.04095	507	0.04481	507	0.07488
506	0.04128	506	0.04511	506	0.0752
505	0.04164	505	0.04537	505	0.07546
504	0.0419	504	0.0457	504	0.07583
503	0.04238	503	0.04623	503	0.07636
502	0.04296	502	0.04676	502	0.07683
501	0.04332	501	0.04704	501	0.07718
500	0.04355	500	0.04725	500	0.07752
499	0.0439	499	0.04755	499	0.07784
498	0.04426	498	0.04781	498	0.07813
497	0.04452	497	0.04805	497	0.07849
496	0.04492	496	0.04849	496	0.07904
495	0.04549	495	0.04898	495	0.07951
494	0.046	494	0.04937	494	0.07992
493	0.04639	493	0.04976	493	0.08039
492	0.04685	492	0.05018	492	0.08095
491	0.04739	491	0.05065	491	0.08152
490	0.04799	490	0.05133	490	0.08211
489	0.04849	489	0.05181	489	0.08268
488	0.04889	488	0.052	488	0.08319
487	0.04962	487	0.05262	487	0.08392
486	0.05035	486	0.05341	486	0.08452
485	0.05064	485	0.05369	485	0.08481
484	0.05106	484	0.05396	484	0.08541
483	0.05189	483	0.05467	483	0.0863
482	0.05266	482	0.05538	482	0.087
481	0.05331	481	0.05585	481	0.08748
480	0.05404	480	0.05631	480	0.08804
479	0.0547	479	0.05687	479	0.08882
478	0.05528	478	0.05741	478	0.08952
477	0.05598	477	0.05794	477	0.09005
476	0.0567	476	0.05855	476	0.0907
475	0.0574	475	0.05918	475	0.09154
474	0.05822	474	0.05984	474	0.09239
473	0.05902	473	0.0606	473	0.09322
472	0.05982	472	0.06138	472	0.09405
471	0.06067	471	0.06205	471	0.09489
470	0.06141	470	0.06275	470	0.09571
469	0.06205	469	0.06342	469	0.09643
468	0.06285	468	0.06405	468	0.09726
467	0.06372	467	0.06474	467	0.09825
466	0.0646	466	0.06536	466	0.09918
465	0.06567	465	0.0662	465	0.10027
464	0.06666	464	0.06714	464	0.10132
463	0.06763	463	0.06798	463	0.10229
462	0.06882	462	0.06891	462	0.10342
461	0.07002	461	0.06989	461	0.10459
460	0.07123	460	0.07079	460	0.10584
459	0.07248	459	0.07176	459	0.10716
458	0.07374	458	0.07285	458	0.10855
457	0.07505	457	0.07395	457	0.10997
456	0.07648	456	0.07514	456	0.11152
455	0.07784	455	0.0763	455	0.11322
454	0.07915	454	0.0774	454	0.11499
453	0.08073	453	0.07868	453	0.11706
452	0.08245	452	0.08005	452	0.11947
451	0.08417	451	0.08152	451	0.12207
450	0.08615	450	0.08315	450	0.12506
449	0.0883	449	0.08475	449	0.12855
448	0.09052	448	0.08639	448	0.1326
447	0.09308	447	0.08832	447	0.13756
446	0.09587	446	0.09042	446	0.14345
445	0.09876	445	0.09265	445	0.15049
444	0.1021	444	0.09504	444	0.15928
443	0.10606	443	0.0976	443	0.17022
442	0.11045	442	0.10043	442	0.18369
441	0.11536	441	0.10355	441	0.20002
440	0.12084	440	0.1068	440	0.21954
439	0.12685	439	0.1101	439	0.24254
438	0.13368	438	0.11376	438	0.26896
437	0.1415	437	0.11789	437	0.29844
436	0.15028	436	0.12245	436	0.32998
435	0.15981	435	0.1271	435	0.36257
434	0.1706	434	0.13205	434	0.39677
433	0.18328	433	0.13793	433	0.43333
432	0.1975	432	0.14434	432	0.47254
431	0.2135	431	0.15144	431	0.51573
430	0.23171	430	0.15975	430	0.56425
429	0.25211	429	0.16894	429	0.61795
428	0.2742	428	0.17852	428	0.6749
427	0.29653	427	0.18787	427	0.7303
426	0.31888	426	0.19684	426	0.78023
425	0.34161	425	0.20533	425	0.82108
424	0.36366	424	0.2128	424	0.84579
423	0.3838	423	0.2192	423	0.85058
422	0.40124	422	0.22454	422	0.83578
421	0.41594	421	0.22917	421	0.80405
420	0.42722	420	0.23343	420	0.75956
419	0.43401	419	0.23701	419	0.70847
418	0.4361	418	0.2398	418	0.65846
417	0.43348	417	0.2416	417	0.6122
416	0.42712	416	0.2422	416	0.57063
415	0.41921	415	0.24214	415	0.53562
414	0.41193	414	0.24192	414	0.50724
413	0.40682	413	0.24212	413	0.48487
412	0.40363	412	0.24281	412	0.46659
411	0.40169	411	0.24302	411	0.45115
410	0.40094	410	0.24317	410	0.43794
409	0.40084	409	0.24473	409	0.42601
408	0.40032	408	0.24688	408	0.4151
407	0.39918	407	0.24864	407	0.4056
406	0.39827	406	0.25095	406	0.39878
405	0.39734	405	0.25347	405	0.39444
404	0.3956	404	0.25539	404	0.39119
403	0.39345	403	0.25754	403	0.38855
402	0.3912	402	0.26007	402	0.38619
401	0.38852	401	0.26242	401	0.38333
400	0.38527	400	0.26458	400	0.37942
399	0.38129	399	0.26644	399	0.37424
398	0.37639	398	0.26798	398	0.36763
397	0.37065	397	0.26943	397	0.35955
396	0.36428	396	0.27065	396	0.35009
395	0.3581	395	0.27131	395	0.34028
394	0.35236	394	0.2719	394	0.33022
393	0.34665	393	0.27281	393	0.31934
392	0.34124	392	0.27301	392	0.30834
391	0.33623	391	0.27265	391	0.29767
390	0.33156	390	0.27287	390	0.2877
389	0.32695	389	0.27306	389	0.27854
388	0.32205	388	0.27246	388	0.27005
387	0.31652	387	0.27111	387	0.26236
386	0.31022	386	0.26938	386	0.25532
385	0.30374	385	0.26731	385	0.24902
384	0.29732	384	0.26453	384	0.24357
383	0.29097	383	0.26166	383	0.23881
382	0.28499	382	0.25924	382	0.23466
381	0.27939	381	0.25674	381	0.23101
380	0.27379	380	0.25394	380	0.22758
379	0.26801	379	0.2506	379	0.2243
378	0.26198	378	0.24623	378	0.22124
377	0.25599	377	0.24156	377	0.21851
376	0.25	376	0.23736	376	0.21607
375	0.2436	375	0.23314	375	0.21369
374	0.23728	374	0.22876	374	0.2114
373	0.23122	373	0.2243	373	0.20931
372	0.22516	372	0.21963	372	0.2073
371	0.21947	371	0.21515	371	0.2053
370	0.21417	370	0.21096	370	0.20348
369	0.2092	369	0.20702	369	0.20186
368	0.20459	368	0.20316	368	0.20035
367	0.2004	367	0.19946	367	0.19898
366	0.19666	366	0.19621	366	0.19781
365	0.19321	365	0.19312	365	0.19668
364	0.19009	364	0.19035	364	0.19563
363	0.18745	363	0.18788	363	0.19506
362	0.18515	362	0.18513	362	0.19485
361	0.18479	361	0.18201	361	0.19321
360	0.18442	360	0.1817	360	0.19215
359	0.17796	359	0.1774	359	0.19211
358	0.17572	358	0.17525	358	0.19149
357	0.17423	357	0.17372	357	0.19157
356	0.17303	356	0.17242	356	0.19165
355	0.1718	355	0.17111	355	0.19128
354	0.17059	354	0.16978	354	0.19114
353	0.16955	353	0.16854	353	0.19134
352	0.16885	352	0.16794	352	0.1918
351	0.16825	351	0.1674	351	0.19242
350	0.16747	350	0.16653	350	0.19282
349	0.16679	349	0.16605	349	0.19333
348	0.16631	348	0.1658	348	0.19385
347	0.16575	347	0.16529	347	0.1942
346	0.16528	346	0.16471	346	0.19469
345	0.16513	345	0.16437	345	0.19535
344	0.16489	344	0.16411	344	0.1957
343	0.16424	343	0.16357	343	0.1957
342	0.1637	342	0.16295	342	0.19605
341	0.16348	341	0.16284	341	0.19677
340	0.1632	340	0.16281	340	0.19743
339	0.16237	339	0.16219	339	0.19789
338	0.16122	338	0.1615	338	0.19811
337	0.16046	337	0.16104	337	0.19828
336	0.15997	336	0.16058	336	0.1988
335	0.15926	335	0.16021	335	0.19936
334	0.15842	334	0.15984	334	0.19969
333	0.15807	333	0.15971	333	0.20042
332	0.15787	332	0.15972	332	0.20125
331	0.15717	331	0.15933	331	0.20162
330	0.15623	330	0.15892	330	0.20181
329	0.15536	329	0.15874	329	0.20194
328	0.15477	328	0.15862	328	0.20256
327	0.15449	327	0.15842	327	0.20353
326	0.15418	326	0.15808	326	0.20431
325	0.1536	325	0.15771	325	0.20493
324	0.1531	324	0.15748	324	0.20547
323	0.15281	323	0.15729	323	0.20584
322	0.15252	322	0.15698	322	0.20625
321	0.15208	321	0.15685	321	0.20704
320	0.15136	320	0.15665	320	0.20763
319	0.15086	319	0.15655	319	0.20804
318	0.15089	318	0.15685	318	0.20875
317	0.15082	317	0.15693	317	0.2094
316	0.15048	316	0.15687	316	0.21007
315	0.15033	315	0.15687	315	0.21086
314	0.15024	314	0.15683	314	0.21163
313	0.14983	313	0.15674	313	0.21235
312	0.1495	312	0.1568	312	0.21288
311	0.14952	311	0.15722	311	0.21354
310	0.14957	310	0.15749	310	0.21437
309	0.14944	309	0.15724	309	0.21493
308	0.1494	308	0.15701	308	0.21534
307	0.14956	307	0.15727	307	0.21592
306	0.14988	306	0.15791	306	0.21678
305	0.15032	305	0.15861	305	0.2178
304	0.15054	304	0.15914	304	0.21857
303	0.15067	303	0.15957	303	0.21919
302	0.15109	302	0.15999	302	0.22008
301	0.15067	301	0.16149	301	0.22503
300	0.15172	300	0.16147	300	0.22613
299	0.15374	299	0.1625	299	0.22727
298	0.15411	298	0.16296	298	0.2281
297	0.15472	297	0.16353	297	0.22902
296	0.15587	296	0.16455	296	0.23005
295	0.15708	295	0.16558	295	0.23109
294	0.15818	294	0.16665	294	0.23222
293	0.15912	293	0.16785	293	0.23323
292	0.1601	292	0.16896	292	0.23434
291	0.16138	291	0.17013	291	0.23578
290	0.16295	290	0.17164	290	0.23743
289	0.16448	289	0.17333	289	0.23897
288	0.16549	288	0.17451	288	0.24016
287	0.16645	287	0.17543	287	0.24162
286	0.16785	286	0.17686	286	0.24366
285	0.16928	285	0.17859	285	0.24585
284	0.17064	284	0.18026	284	0.24799
283	0.17229	283	0.18201	283	0.25038
282	0.1741	282	0.18371	282	0.25309
281	0.17583	281	0.18556	281	0.25577
280	0.17762	280	0.18773	280	0.25853
279	0.17959	279	0.19011	279	0.26153
278	0.18161	278	0.19247	278	0.26466
277	0.18354	277	0.19441	277	0.26783
276	0.1856	276	0.19656	276	0.27124
275	0.18785	275	0.19934	275	0.2747
274	0.19019	274	0.20215	274	0.27794
273	0.19237	273	0.20447	273	0.28097
272	0.19454	272	0.2063	272	0.2842
271	0.19702	271	0.20847	271	0.28774
270	0.19941	270	0.21115	270	0.29092
269	0.20176	269	0.21376	269	0.29383
268	0.20408	268	0.21599	268	0.29679
267	0.20584	267	0.21745	267	0.29944
266	0.20747	266	0.21899	266	0.30206
265	0.20944	265	0.22137	265	0.30503
264	0.21123	264	0.22356	264	0.30794
263	0.21284	263	0.22545	263	0.31071
262	0.21419	262	0.22749	262	0.31343
261	0.2151	261	0.22858	261	0.31617
260	0.21618	260	0.22889	260	0.3191
259	0.21761	259	0.23018	259	0.32193
258	0.21894	258	0.23211	258	0.32445
257	0.22011	257	0.2338	257	0.32686
256	0.22135	256	0.23572	256	0.32909
255	0.22247	255	0.23776	255	0.3309
254	0.22342	254	0.23957	254	0.33249
253	0.22454	253	0.24099	253	0.33442
252	0.22589	252	0.24229	252	0.33665
251	0.22711	251	0.24385	251	0.33855
250	0.22817	250	0.24539	250	0.34029
249	0.22928	249	0.24697	249	0.34236
248	0.23056	248	0.24839	248	0.34494
247	0.23201	247	0.24941	247	0.34774
246	0.23336	246	0.25111	246	0.35017
245	0.23438	245	0.25368	245	0.3523
244	0.23532	244	0.25606	244	0.35473
243	0.23668	243	0.25776	243	0.35796
242	0.23834	242	0.25934	242	0.36159
241	0.23954	241	0.26127	241	0.36489
240	0.24041	240	0.26333	240	0.36796
239	0.24158	239	0.2655	239	0.37139
238	0.24306	238	0.26796	238	0.37537
237	0.24469	237	0.27033	237	0.37956
236	0.24628	236	0.27222	236	0.38376
235	0.24774	235	0.27396	235	0.38806
234	0.24941	234	0.27589	234	0.39248
233	0.25134	233	0.27835	233	0.39675
232	0.25332	232	0.28086	232	0.40089
231	0.25546	231	0.28329	231	0.40533
230	0.25769	230	0.28552	230	0.41035
229	0.26007	229	0.28693	229	0.4158
228	0.26266	228	0.2889	228	0.42144
227	0.26517	227	0.29189	227	0.42745
226	0.26758	226	0.29498	226	0.43399
225	0.26991	225	0.29795	225	0.44101
224	0.27208	224	0.3008	224	0.44866
223	0.27436	223	0.30397	223	0.45732
222	0.27681	222	0.30751	222	0.46737
221	0.2793	221	0.3114	221	0.47862
220	0.28174	220	0.31542	220	0.49097
219	0.28445	219	0.31928	219	0.50498
218	0.28795	218	0.32361	218	0.52138
217	0.29204	217	0.32897	217	0.54092
216	0.2962	216	0.33515	216	0.56357
215	0.30057	215	0.34195	215	0.58965
214	0.30519	214	0.34917	214	0.62167
213	0.31023	213	0.35743	213	0.66225
212	0.3164	212	0.36731	212	0.71258
211	0.32352	211	0.37867	211	0.77506
210	0.33101	210	0.39112	210	0.85114
209	0.33861	209	0.4043	209	0.94162
208	0.34671	208	0.41989	208	1.05371
207	0.35596	207	0.43882	207	1.1916
206	0.36616	206	0.46056	206	1.35434
205	0.37678	205	0.48606	205	1.5445
204	0.38791	204	0.51727	204	1.75676
203	0.39992	203	0.55686	203	1.97589
202	0.41245	202	0.60896	202	2.16751
201	0.42532	201	0.68032	201	2.28621
200	0.43552	200	0.75058	200	2.33862

## Sheet: Fig. 2e
The UV-vis absorption spectra of CDs without metal doping (final concentration of 20 μg/mL) in water, and THF (99.6%)
In water		In THF (99.6%)
Wavelength (nm)	Absorbance	Wavelength (nm)	Absorbance
800	0.0086	800	0.04897
799	0.00742	799	0.04631
798	0.00657	798	0.04473
797	0.00635	797	0.0448
796	0.00638	796	0.04477
795	0.00639	795	0.0442
794	0.00625	794	0.0443
793	0.00605	793	0.0449
792	0.0058	792	0.04494
791	0.00585	791	0.04496
790	0.00645	790	0.0452
789	0.00703	789	0.04488
788	0.00688	788	0.04472
787	0.00657	787	0.0454
786	0.00681	786	0.04556
785	0.00741	785	0.04538
784	0.00811	784	0.0453
783	0.00828	783	0.04531
782	0.00796	782	0.04572
781	0.00781	781	0.04597
780	0.00772	780	0.04621
779	0.00749	779	0.04631
778	0.00735	778	0.04613
777	0.00719	777	0.04672
776	0.00752	776	0.04754
775	0.00841	775	0.04753
774	0.00885	774	0.0475
773	0.00864	773	0.0476
772	0.00852	772	0.04716
771	0.0088	771	0.04713
770	0.0092	770	0.04768
769	0.00933	769	0.04812
768	0.00926	768	0.04855
767	0.00956	767	0.04908
766	0.00987	766	0.0494
765	0.00993	765	0.04963
764	0.0102	764	0.04988
763	0.01058	763	0.04987
762	0.011	762	0.05036
761	0.01112	761	0.05151
760	0.01116	760	0.05201
759	0.0119	759	0.05186
758	0.01261	758	0.05205
757	0.01304	757	0.0528
756	0.01333	756	0.0534
755	0.01316	755	0.05341
754	0.01359	754	0.05348
753	0.01444	753	0.05399
752	0.01479	752	0.05464
751	0.01538	751	0.0553
750	0.01604	750	0.05575
749	0.01634	749	0.05589
748	0.01645	748	0.05643
747	0.0162	747	0.05708
746	0.01622	746	0.05748
745	0.01689	745	0.05778
744	0.01785	744	0.05766
743	0.01853	743	0.05797
742	0.01871	742	0.05883
741	0.0189	741	0.05932
740	0.01927	740	0.05989
739	0.0198	739	0.06049
738	0.02025	738	0.06066
737	0.02032	737	0.06118
736	0.02051	736	0.06195
735	0.02111	735	0.06247
734	0.02158	734	0.06293
733	0.02172	733	0.06341
732	0.02214	732	0.06368
731	0.02286	731	0.06399
730	0.02357	730	0.06492
729	0.02406	729	0.06595
728	0.0244	728	0.0665
727	0.02489	727	0.06716
726	0.02517	726	0.06824
725	0.02527	725	0.0695
724	0.02588	724	0.07104
723	0.02692	723	0.07262
722	0.02753	722	0.07411
721	0.02803	721	0.076
720	0.02924	720	0.07857
719	0.03071	719	0.08102
718	0.03177	718	0.08316
717	0.03267	717	0.08601
716	0.03371	716	0.0895
715	0.03505	715	0.09306
714	0.03688	714	0.09701
713	0.03881	713	0.10148
712	0.04067	712	0.1062
711	0.04292	711	0.11105
710	0.04531	710	0.11592
709	0.04791	709	0.12174
708	0.05106	708	0.12842
707	0.0544	707	0.13515
706	0.058	706	0.14294
705	0.06178	705	0.15178
704	0.0658	704	0.16095
703	0.07059	703	0.17122
702	0.07596	702	0.1828
701	0.08161	701	0.19538
700	0.08746	700	0.20931
699	0.09372	699	0.22475
698	0.10085	698	0.24203
697	0.10875	697	0.26109
696	0.11712	696	0.28163
695	0.12595	695	0.30328
694	0.13509	694	0.32547
693	0.14491	693	0.34824
692	0.15583	692	0.37184
691	0.16713	691	0.39501
690	0.1787	690	0.41637
689	0.1913	689	0.43639
688	0.20423	688	0.45401
687	0.21687	687	0.46772
686	0.22999	686	0.47718
685	0.24372	685	0.4818
684	0.2571	684	0.48148
683	0.2693	683	0.47586
682	0.28066	682	0.46424
681	0.29098	681	0.44778
680	0.29926	680	0.4276
679	0.30562	679	0.40364
678	0.31012	678	0.37795
677	0.31221	677	0.35196
676	0.31182	676	0.32518
675	0.30892	675	0.29943
674	0.3035	674	0.27629
673	0.29557	673	0.2551
672	0.28503	672	0.2365
671	0.27261	671	0.22151
670	0.25935	670	0.20985
669	0.24516	669	0.20084
668	0.22999	668	0.19402
667	0.21492	667	0.18965
666	0.20066	666	0.18767
665	0.18724	665	0.18715
664	0.17501	664	0.18758
663	0.16452	663	0.18917
662	0.15598	662	0.19266
661	0.14888	661	0.19751
660	0.14305	660	0.20256
659	0.13893	659	0.20833
658	0.13629	658	0.21471
657	0.13476	657	0.22119
656	0.13441	656	0.22807
655	0.13512	655	0.23509
654	0.13648	654	0.24197
653	0.13827	653	0.24845
652	0.14054	652	0.25386
651	0.14349	651	0.25873
650	0.14698	650	0.2635
649	0.1505	649	0.26768
648	0.15407	648	0.27145
647	0.15806	647	0.27524
646	0.16241	646	0.27921
645	0.16669	645	0.28395
644	0.17081	644	0.29037
643	0.17514	643	0.2989
642	0.17971	642	0.30988
641	0.18408	641	0.32311
640	0.1883	640	0.33748
639	0.1929	639	0.35244
638	0.19779	638	0.36668
637	0.20292	637	0.37825
636	0.20821	636	0.38563
635	0.21358	635	0.38732
634	0.21937	634	0.38292
633	0.22553	633	0.3735
632	0.23166	632	0.36011
631	0.23734	631	0.34348
630	0.24216	630	0.32499
629	0.24554	629	0.3073
628	0.24732	628	0.2917
627	0.24716	627	0.27784
626	0.24467	626	0.26592
625	0.24017	625	0.25589
624	0.23369	624	0.24725
623	0.22564	623	0.23987
622	0.21709	622	0.23428
621	0.2083	621	0.2306
620	0.19952	620	0.22842
619	0.19159	619	0.22818
618	0.18458	618	0.23028
617	0.1786	617	0.2343
616	0.17379	616	0.23961
615	0.16987	615	0.24566
614	0.1667	614	0.25168
613	0.16453	613	0.25664
612	0.16349	612	0.25989
611	0.16307	611	0.26089
610	0.16331	610	0.2595
609	0.16419	609	0.25603
608	0.16526	608	0.25042
607	0.16648	607	0.24316
606	0.16755	606	0.23493
605	0.16808	605	0.22583
604	0.16787	604	0.21657
603	0.16649	603	0.20784
602	0.16384	602	0.19982
601	0.16053	601	0.19289
600	0.15621	600	0.18705
599	0.15088	599	0.18206
598	0.14539	598	0.17802
597	0.13956	597	0.17482
596	0.13371	596	0.17296
595	0.1283	595	0.17245
594	0.12341	594	0.1723
593	0.11917	593	0.17213
592	0.1154	592	0.1724
591	0.11198	591	0.17273
590	0.10919	590	0.17254
589	0.10684	589	0.17215
588	0.10489	588	0.17148
587	0.10365	587	0.17012
586	0.10231	586	0.168
585	0.10071	585	0.16537
584	0.09933	584	0.16277
583	0.09789	583	0.15995
582	0.09645	582	0.15689
581	0.09509	581	0.154
580	0.09344	580	0.1512
579	0.09142	579	0.14844
578	0.08942	578	0.14553
577	0.08742	577	0.14268
576	0.08527	576	0.14013
575	0.08317	575	0.13764
574	0.08101	574	0.13496
573	0.07891	573	0.13246
572	0.0771	572	0.13059
571	0.07522	571	0.12882
570	0.07294	570	0.1269
569	0.07087	569	0.12521
568	0.0693	568	0.12388
567	0.0677	567	0.12263
566	0.06601	566	0.12159
565	0.06462	565	0.12107
564	0.06354	564	0.12074
563	0.06241	563	0.12008
562	0.06119	562	0.11911
561	0.0601	561	0.11849
560	0.05917	560	0.11811
559	0.05842	559	0.11773
558	0.05778	558	0.11722
557	0.05694	557	0.1164
556	0.05613	556	0.11566
555	0.05562	555	0.11523
554	0.05504	554	0.11463
553	0.05443	553	0.11389
552	0.05365	552	0.11332
551	0.05279	551	0.11295
550	0.05222	550	0.1127
549	0.05161	549	0.11251
548	0.05105	548	0.11257
547	0.05052	547	0.11214
546	0.04974	546	0.11146
545	0.0492	545	0.11174
544	0.04879	544	0.11194
543	0.04826	543	0.11159
542	0.04791	542	0.11162
541	0.04771	541	0.11196
540	0.04756	540	0.1124
539	0.04735	539	0.11258
538	0.04712	538	0.11236
537	0.047	537	0.11225
536	0.04685	536	0.11244
535	0.04663	535	0.11283
534	0.04642	534	0.11292
533	0.04623	533	0.11272
532	0.04605	532	0.11269
531	0.04587	531	0.11288
530	0.04569	530	0.11298
529	0.04551	529	0.11292
528	0.04533	528	0.11301
527	0.04524	527	0.11334
526	0.04517	526	0.11367
525	0.04516	525	0.11414
524	0.04521	524	0.11475
523	0.04511	523	0.11503
522	0.04499	522	0.1152
521	0.04508	521	0.1155
520	0.04523	520	0.1158
519	0.0453	519	0.11632
518	0.04538	518	0.11693
517	0.04574	517	0.11768
516	0.04609	516	0.11862
515	0.04606	515	0.11884
514	0.04607	514	0.11872
513	0.04647	513	0.11944
512	0.04687	512	0.12046
511	0.04716	511	0.12132
510	0.0475	510	0.12204
509	0.04794	509	0.12273
508	0.04865	508	0.12372
507	0.04922	507	0.12457
506	0.04957	506	0.12534
505	0.05015	505	0.1262
504	0.05074	504	0.12681
503	0.0512	503	0.12758
502	0.05175	502	0.12865
501	0.05236	501	0.12954
500	0.05294	500	0.13036
499	0.05346	499	0.1311
498	0.05403	498	0.13174
497	0.0547	497	0.1326
496	0.05554	496	0.13384
495	0.05633	495	0.13501
494	0.05689	494	0.13582
493	0.0575	493	0.13644
492	0.05829	492	0.13735
491	0.05914	491	0.13864
490	0.06008	490	0.14014
489	0.06092	489	0.14128
488	0.06158	488	0.14202
487	0.06258	487	0.14336
486	0.06367	486	0.14509
485	0.06438	485	0.14624
484	0.06524	484	0.14726
483	0.06654	483	0.14888
482	0.06775	482	0.1506
481	0.06872	481	0.15205
480	0.06977	480	0.15357
479	0.07101	479	0.15518
478	0.07229	478	0.15663
477	0.07348	477	0.1581
476	0.07473	476	0.15975
475	0.07601	475	0.16136
474	0.07715	474	0.16295
473	0.07842	473	0.16459
472	0.07988	472	0.16632
471	0.08116	471	0.16779
470	0.08243	470	0.16911
469	0.08385	469	0.17062
468	0.08539	468	0.17227
467	0.08696	467	0.17374
466	0.08847	466	0.17492
465	0.09025	465	0.17634
464	0.09215	464	0.17804
463	0.09398	463	0.17989
462	0.09589	462	0.18164
461	0.09787	461	0.1832
460	0.09993	460	0.18488
459	0.10207	459	0.18673
458	0.10442	458	0.18874
457	0.10689	457	0.19073
456	0.10938	456	0.19288
455	0.11196	455	0.1952
454	0.11466	454	0.19741
453	0.11762	453	0.19974
452	0.12082	452	0.20245
451	0.12426	451	0.20541
450	0.12801	450	0.20855
449	0.13207	449	0.21199
448	0.13651	448	0.21584
447	0.14152	447	0.22001
446	0.14722	446	0.22438
445	0.15351	445	0.22902
444	0.1605	444	0.23398
443	0.16846	443	0.23945
442	0.17766	442	0.24552
441	0.1881	441	0.2519
440	0.19962	440	0.2583
439	0.21252	439	0.265
438	0.22733	438	0.2727
437	0.24414	437	0.28192
436	0.26272	436	0.29265
435	0.28321	435	0.30431
434	0.30667	434	0.31792
433	0.33405	433	0.33518
432	0.3651	432	0.35579
431	0.39994	431	0.37992
430	0.43949	430	0.40899
429	0.48366	429	0.44366
428	0.53077	428	0.48348
427	0.57778	427	0.52681
426	0.62368	426	0.57414
425	0.66868	425	0.62641
424	0.71063	424	0.68182
423	0.7479	423	0.73772
422	0.7793	422	0.79162
421	0.80473	421	0.84364
420	0.82391	420	0.89357
419	0.83544	419	0.93956
418	0.83843	418	0.98021
417	0.83303	417	1.01578
416	0.82163	416	1.0477
415	0.80809	415	1.07496
414	0.79567	414	1.09406
413	0.78675	413	1.10145
412	0.78153	412	1.09637
411	0.77877	411	1.07996
410	0.77786	410	1.05544
409	0.77832	409	1.02748
408	0.77876	408	0.99875
407	0.77814	407	0.97121
406	0.77714	406	0.94847
405	0.77599	405	0.9316
404	0.77399	404	0.91888
403	0.77132	403	0.90927
402	0.76819	402	0.90273
401	0.7641	401	0.89828
400	0.75855	400	0.89389
399	0.75155	399	0.88825
398	0.74328	398	0.88013
397	0.73382	397	0.8684
396	0.72353	396	0.85362
395	0.71319	395	0.83857
394	0.70292	394	0.8247
393	0.69277	393	0.81143
392	0.6832	392	0.79945
391	0.67423	391	0.78898
390	0.66566	390	0.77971
389	0.65684	389	0.77158
388	0.64708	388	0.76394
387	0.63563	387	0.75588
386	0.622	386	0.74689
385	0.60784	385	0.73735
384	0.59451	384	0.72748
383	0.58132	383	0.71683
382	0.56805	382	0.70495
381	0.5551	381	0.69212
380	0.54225	380	0.67864
379	0.52938	379	0.66487
378	0.51635	378	0.65115
377	0.50271	377	0.63764
376	0.48831	376	0.62425
375	0.4736	375	0.61053
374	0.45935	374	0.59658
373	0.4452	373	0.58207
372	0.43117	372	0.56715
371	0.41825	371	0.5525
370	0.40613	370	0.53802
369	0.39463	369	0.52425
368	0.38418	368	0.51143
367	0.37479	367	0.49982
366	0.36606	366	0.48957
365	0.3578	365	0.48001
364	0.35039	364	0.47123
363	0.34398	363	0.46349
362	0.33824	362	0.45661
361	0.33161	361	0.44797
360	0.32402	360	0.43763
359	0.31799	359	0.42994
358	0.31375	358	0.42483
357	0.31003	357	0.42082
356	0.3067	356	0.41726
355	0.30366	355	0.41375
354	0.3006	354	0.41077
353	0.29763	353	0.4077
352	0.29517	352	0.40511
351	0.29307	351	0.40316
350	0.29101	350	0.4007
349	0.28911	349	0.39823
348	0.28733	348	0.39581
347	0.28547	347	0.39306
346	0.28363	346	0.39048
345	0.28202	345	0.38819
344	0.28078	344	0.38626
343	0.27968	343	0.38448
342	0.27852	342	0.38254
341	0.27723	341	0.38055
340	0.27574	340	0.37792
339	0.27401	339	0.37424
338	0.27208	338	0.37007
337	0.27041	337	0.3665
336	0.26883	336	0.36323
335	0.26704	335	0.35912
334	0.26507	334	0.35438
333	0.26324	333	0.35021
332	0.26171	332	0.34682
331	0.26026	331	0.34297
330	0.25893	330	0.33878
329	0.25748	329	0.33448
328	0.25602	328	0.33019
327	0.25469	327	0.32572
326	0.25336	326	0.31998
325	0.25205	325	0.31392
324	0.25089	324	0.30827
323	0.2498	323	0.30216
322	0.24845	322	0.29625
321	0.24712	321	0.29123
320	0.24609	320	0.28626
319	0.24528	319	0.2814
318	0.24444	318	0.2759
317	0.24352	317	0.27058
316	0.24283	316	0.26666
315	0.24224	315	0.26024
314	0.24151	314	0.25307
313	0.24097	313	0.24834
312	0.24077	312	0.24292
311	0.24059	311	0.23696
310	0.24031	310	0.22956
309	0.24004	309	0.22262
308	0.24002	308	0.21994
307	0.24037	307	0.21748
306	0.24075	306	0.21206
305	0.24125	305	0.2041
304	0.24209	304	0.19625
303	0.24306	303	0.18887
302	0.24407	302	0.18175
301	0.24539	301	0.21182
300	0.14619	300	0.13007
299	0.14707	299	0.12963
298	0.14601	298	0.12934
297	0.14714	297	0.12929
296	0.14627	296	0.12871
295	0.1467	295	0.12931
294	0.14702	294	0.13107
293	0.14609	293	0.12937
292	0.14678	292	0.12925
291	0.14693	291	0.1295
290	0.14596	290	0.12972
289	0.14729	289	0.13091
288	0.14678	288	0.13139
287	0.14837	287	0.13062
286	0.14849	286	0.13255
285	0.14744	285	0.13188
284	0.14896	284	0.1316
283	0.14933	283	0.13257
282	0.14953	282	0.13269
281	0.14821	281	0.13278
280	0.14664	280	0.13201
279	0.14693	279	0.13211
278	0.14643	278	0.13249
277	0.1454	277	0.13377
276	0.14646	276	0.13186
275	0.14737	275	0.13291
274	0.14597	274	0.13457
273	0.1459	273	0.13463
272	0.14473	272	0.13343
271	0.14346	271	0.13203
270	0.1425	270	0.13219
269	0.14237	269	0.13103
268	0.14146	268	0.13145
267	0.1413	267	0.12933
266	0.1409	266	0.13189
265	0.14103	265	0.13248
264	0.13846	264	0.13348
263	0.13843	263	0.13204
262	0.13934	262	0.1311
261	0.13911	261	0.13105
260	0.13791	260	0.13041
259	0.13801	259	0.12775
258	0.13673	258	0.12653
257	0.13806	257	0.12536
256	0.13667	256	0.12684
255	0.13443	255	0.12467
254	0.13588	254	0.12509
253	0.13667	253	0.125
252	0.13366	252	0.12444
251	0.13473	251	0.12436
250	0.13253	250	0.12324
249	0.13319	249	0.1214
248	0.13552	248	0.12267
247	0.13496	247	0.12328
246	0.1354	246	0.12356
245	0.13463	245	0.12477
244	0.13601	244	0.12451
243	0.1377	243	0.12729
242	0.13754	242	0.12768
241	0.1381	241	0.1289
240	0.14027	240	0.13057
239	0.14185	239	0.13111
238	0.14261	238	0.13249
237	0.14318	237	0.13668
236	0.14279	236	0.13856
235	0.14371	235	0.13895
234	0.14713	234	0.14113
233	0.14701	233	0.14029
232	0.14951	232	0.14174
231	0.14984	231	0.14545
230	0.15028	230	0.14619
229	0.15379	229	0.14882
228	0.15441	228	0.14986
227	0.15601	227	0.15043
226	0.15384	226	0.15239
225	0.15744	225	0.15649
224	0.15964	224	0.15714
223	0.16161	223	0.1577
222	0.16205	222	0.16261
221	0.16165	221	0.16265
220	0.16601	220	0.16425
219	0.16601	219	0.1698
218	0.16841	218	0.17169
217	0.16923	217	0.17514
216	0.17107	216	0.1746
215	0.17311	215	0.17889
214	0.17446	214	0.18196
213	0.17912	213	0.19029
212	0.18436	212	0.189
211	0.18385	211	0.193
210	0.1887	210	0.20059
209	0.18536	209	0.20513
208	0.18964	208	0.20854
207	0.19662	207	0.21711
206	0.20675	206	0.23022
205	0.20527	205	0.23351
204	0.21239	204	0.23522
203	0.21799	203	0.24913
202	0.22786	202	0.25566
201	0.23556	201	0.26707
200	0.23831	200	0.27588

## Sheet: Fig. 2f
The UV-vis absorption spectra of Mn@CDs-100 (final concentration of 10 μg/mL) in water, 1 mM HCl, and 1mM NaOH
In water		In 1 mM HCl		In 1 mM NaOH
Wavelength (nm)	Absorbance	Wavelength (nm)	Absorbance	Wavelength (nm)	Absorbance
800	0.00172	800	0.01174	800	0.00629
799	0.00773	799	0.00795	799	0.00621
798	0.00893	798	0.00778	798	0.0063
797	0.00748	797	0.00955	797	0.00718
796	0.00818	796	0.00952	796	0.00734
795	0.00912	795	0.0091	795	0.00694
794	0.00981	794	0.00976	794	0.00696
793	0.00958	793	0.01053	793	0.00684
792	0.01058	792	0.01097	792	0.00672
791	0.01012	791	0.01041	791	0.00653
790	0.00965	790	0.00986	790	0.00706
789	0.0115	789	0.01144	789	0.00734
788	0.01034	788	0.01241	788	0.00711
787	0.01125	787	0.01174	787	0.00769
786	0.01146	786	0.01278	786	0.00848
785	0.01219	785	0.01249	785	0.00733
784	0.01195	784	0.01334	784	0.00778
783	0.01243	783	0.01325	783	0.00814
782	0.01152	782	0.01304	782	0.00758
781	0.01231	781	0.01344	781	0.00717
780	0.0131	780	0.01361	780	0.00901
779	0.01346	779	0.01407	779	0.00899
778	0.01381	778	0.01346	778	0.00854
777	0.01319	777	0.01464	777	0.00875
776	0.01435	776	0.01414	776	0.00872
775	0.0143	775	0.01397	775	0.00902
774	0.0142	774	0.01394	774	0.00915
773	0.01458	773	0.01368	773	0.00981
772	0.01488	772	0.01405	772	0.00933
771	0.01609	771	0.01456	771	0.00986
770	0.01564	770	0.01523	770	0.00974
769	0.0159	769	0.01416	769	0.00989
768	0.01632	768	0.01456	768	0.00941
767	0.01569	767	0.01473	767	0.00946
766	0.01692	766	0.01487	766	0.0091
765	0.01641	765	0.01459	765	0.00992
764	0.01752	764	0.01532	764	0.01019
763	0.01836	763	0.01571	763	0.01062
762	0.01842	762	0.01664	762	0.01067
761	0.01864	761	0.01767	761	0.01206
760	0.01981	760	0.01718	760	0.01052
759	0.02045	759	0.01747	759	0.0105
758	0.02065	758	0.01755	758	0.01116
757	0.02223	757	0.01846	757	0.0119
756	0.02233	756	0.01906	756	0.01183
755	0.02298	755	0.0195	755	0.01194
754	0.02461	754	0.0199	754	0.01263
753	0.02583	753	0.02159	753	0.01174
752	0.02626	752	0.02239	752	0.01214
751	0.0264	751	0.02348	751	0.01278
750	0.02778	750	0.02449	750	0.01362
749	0.02943	749	0.02538	749	0.01376
748	0.03048	748	0.02692	748	0.01368
747	0.03199	747	0.02833	747	0.0139
746	0.03346	746	0.02899	746	0.01421
745	0.03474	745	0.03055	745	0.01421
744	0.03588	744	0.03156	744	0.01461
743	0.03748	743	0.0335	743	0.01436
742	0.03868	742	0.03553	742	0.01455
741	0.04053	741	0.0361	741	0.01531
740	0.04222	740	0.03909	740	0.01512
739	0.04431	739	0.04	739	0.01544
738	0.04574	738	0.04164	738	0.01565
737	0.048	737	0.04342	737	0.01631
736	0.04991	736	0.04552	736	0.01611
735	0.05178	735	0.04777	735	0.01606
734	0.05399	734	0.04991	734	0.01605
733	0.0555	733	0.05208	733	0.01623
732	0.05782	732	0.05426	732	0.01593
731	0.06009	731	0.05649	731	0.01578
730	0.06225	730	0.0592	730	0.01555
729	0.06513	729	0.0622	729	0.01545
728	0.06764	728	0.06479	728	0.0159
727	0.07063	727	0.06762	727	0.01572
726	0.0741	726	0.07149	726	0.01599
725	0.07674	725	0.0744	725	0.01668
724	0.08057	724	0.07795	724	0.01682
723	0.08366	723	0.08158	723	0.01653
722	0.08761	722	0.0854	722	0.01723
721	0.09196	721	0.08984	721	0.01786
720	0.09578	720	0.09395	720	0.01837
719	0.09995	719	0.09897	719	0.0183
718	0.10481	718	0.104	718	0.01814
717	0.10954	717	0.10889	717	0.01887
716	0.11379	716	0.11342	716	0.01918
715	0.11918	715	0.11811	715	0.01967
714	0.12428	714	0.12343	714	0.02003
713	0.12863	713	0.12873	713	0.02067
712	0.13352	712	0.13367	712	0.02086
711	0.13834	711	0.138	711	0.02132
710	0.14311	710	0.14113	710	0.02193
709	0.14701	709	0.14389	709	0.02214
708	0.15065	708	0.15071	708	0.02254
707	0.15401	707	0.1547	707	0.02273
706	0.1574	706	0.15787	706	0.02353
705	0.15842	705	0.16029	705	0.02415
704	0.15887	704	0.16238	704	0.02456
703	0.16293	703	0.16358	703	0.02533
702	0.16342	702	0.16417	702	0.02538
701	0.16367	701	0.16423	701	0.02588
700	0.16321	700	0.16367	700	0.02624
699	0.16191	699	0.16261	699	0.02723
698	0.15989	698	0.16075	698	0.02803
697	0.1573	697	0.1584	697	0.02893
696	0.15488	696	0.15545	696	0.02972
695	0.15161	695	0.15181	695	0.03068
694	0.14794	694	0.14787	694	0.03177
693	0.14399	693	0.14364	693	0.03302
692	0.13926	692	0.13895	692	0.03458
691	0.13438	691	0.13405	691	0.0361
690	0.12964	690	0.12934	690	0.03822
689	0.12446	689	0.1241	689	0.04028
688	0.1199	688	0.11893	688	0.04241
687	0.11529	687	0.11374	687	0.04505
686	0.11064	686	0.10887	686	0.04737
685	0.10606	685	0.10378	685	0.05016
684	0.10165	684	0.09915	684	0.05307
683	0.09753	683	0.09488	683	0.05577
682	0.09377	682	0.09088	682	0.05909
681	0.09035	681	0.08707	681	0.06275
680	0.08707	680	0.08323	680	0.06629
679	0.08413	679	0.08019	679	0.06972
678	0.08131	678	0.07742	678	0.07319
677	0.07884	677	0.07456	677	0.07691
676	0.07671	676	0.07186	676	0.08057
675	0.07472	675	0.06937	675	0.08452
674	0.07287	674	0.06755	674	0.08854
673	0.07127	673	0.06574	673	0.0922
672	0.06975	672	0.06395	672	0.09579
671	0.06811	671	0.06242	671	0.09962
670	0.06696	670	0.06089	670	0.10368
669	0.06599	669	0.05923	669	0.10806
668	0.06489	668	0.05782	668	0.11243
667	0.06382	667	0.05653	667	0.11677
666	0.06289	666	0.05543	666	0.12146
665	0.06187	665	0.05473	665	0.12625
664	0.06113	664	0.05379	664	0.13084
663	0.06054	663	0.05268	663	0.13532
662	0.05969	662	0.05167	662	0.1395
661	0.05915	661	0.05077	661	0.14315
660	0.05848	660	0.0502	660	0.14644
659	0.05782	659	0.04966	659	0.1489
658	0.05727	658	0.04896	658	0.15055
657	0.05665	657	0.0484	657	0.15139
656	0.05623	656	0.04785	656	0.15127
655	0.05583	655	0.04758	655	0.15073
654	0.05525	654	0.04715	654	0.14988
653	0.05488	653	0.04667	653	0.14841
652	0.05454	652	0.04632	652	0.14648
651	0.054	651	0.04599	651	0.14482
650	0.05343	650	0.0459	650	0.14366
649	0.05331	649	0.0457	649	0.14276
648	0.05293	648	0.04533	648	0.14185
647	0.05225	647	0.04493	647	0.14133
646	0.05179	646	0.04482	646	0.14138
645	0.05129	645	0.04481	645	0.14096
644	0.05092	644	0.04456	644	0.14031
643	0.05048	643	0.04438	643	0.13953
642	0.05016	642	0.04412	642	0.13794
641	0.04988	641	0.04374	641	0.13569
640	0.04927	640	0.04355	640	0.13252
639	0.04851	639	0.04334	639	0.12859
638	0.04808	638	0.04292	638	0.12465
637	0.04755	637	0.04254	637	0.12032
636	0.04718	636	0.04254	636	0.11571
635	0.04689	635	0.04253	635	0.1116
634	0.04622	634	0.04229	634	0.10742
633	0.04597	633	0.04202	633	0.10323
632	0.0456	632	0.04177	632	0.09944
631	0.04512	631	0.0418	631	0.09622
630	0.04469	630	0.04153	630	0.09314
629	0.04439	629	0.04124	629	0.09007
628	0.04416	628	0.04122	628	0.0873
627	0.04396	627	0.0416	627	0.08477
626	0.04375	626	0.0418	626	0.08237
625	0.04372	625	0.04164	625	0.07992
624	0.04377	624	0.04173	624	0.07755
623	0.04384	623	0.04208	623	0.07535
622	0.04389	622	0.04222	622	0.07342
621	0.04387	621	0.0424	621	0.07187
620	0.04417	620	0.04277	620	0.07015
619	0.04431	619	0.04313	619	0.06885
618	0.04423	618	0.04309	618	0.06777
617	0.04459	617	0.04329	617	0.06673
616	0.04463	616	0.0437	616	0.06584
615	0.04486	615	0.04351	615	0.06493
614	0.04483	614	0.04345	614	0.06401
613	0.04428	613	0.04387	613	0.0632
612	0.0444	612	0.04394	612	0.06259
611	0.04451	611	0.04381	611	0.06199
610	0.0442	610	0.0437	610	0.06162
609	0.04396	609	0.04349	609	0.0613
608	0.04367	608	0.04331	608	0.06065
607	0.04331	607	0.04314	607	0.06017
606	0.0431	606	0.04279	606	0.05996
605	0.04268	605	0.04251	605	0.05971
604	0.04216	604	0.04233	604	0.05942
603	0.04175	603	0.04177	603	0.05915
602	0.04123	602	0.04095	602	0.05883
601	0.04078	601	0.04072	601	0.0584
600	0.04038	600	0.04047	600	0.0583
599	0.03977	599	0.03975	599	0.0578
598	0.03931	598	0.03936	598	0.05716
597	0.03871	597	0.03915	597	0.0566
596	0.03835	596	0.03882	596	0.05623
595	0.03783	595	0.03834	595	0.05577
594	0.03722	594	0.03784	594	0.05515
593	0.03664	593	0.03718	593	0.0545
592	0.03627	592	0.03684	592	0.05378
591	0.03593	591	0.03649	591	0.05336
590	0.03534	590	0.03614	590	0.05258
589	0.03487	589	0.03559	589	0.05192
588	0.0344	588	0.03509	588	0.05102
587	0.03387	587	0.03492	587	0.05011
586	0.03348	586	0.03473	586	0.04898
585	0.03322	585	0.03453	585	0.04795
584	0.03297	584	0.03457	584	0.04704
583	0.03273	583	0.03446	583	0.04593
582	0.03266	582	0.03416	582	0.04492
581	0.03241	581	0.03419	581	0.0436
580	0.03244	580	0.03426	580	0.04264
579	0.03224	579	0.03422	579	0.04191
578	0.03211	578	0.0343	578	0.04129
577	0.03225	577	0.03444	577	0.04049
576	0.03212	576	0.03422	576	0.03983
575	0.03226	575	0.03432	575	0.03922
574	0.0325	574	0.03455	574	0.03855
573	0.03249	573	0.03469	573	0.03827
572	0.03259	572	0.03468	572	0.03779
571	0.03293	571	0.03481	571	0.03726
570	0.0333	570	0.0352	570	0.03702
569	0.03346	569	0.03559	569	0.03682
568	0.03377	568	0.03614	568	0.03676
567	0.03434	567	0.03664	567	0.03633
566	0.03437	566	0.03731	566	0.03629
565	0.03497	565	0.03799	565	0.03634
564	0.0358	564	0.03843	564	0.03638
563	0.0365	563	0.03937	563	0.03629
562	0.03733	562	0.03961	562	0.03538
561	0.038	561	0.03999	561	0.03512
560	0.03879	560	0.04078	560	0.03543
559	0.03953	559	0.0415	559	0.03527
558	0.04053	558	0.04196	558	0.03563
557	0.04091	557	0.04262	557	0.03584
556	0.04152	556	0.04307	556	0.03616
555	0.04213	555	0.04362	555	0.03657
554	0.04286	554	0.044	554	0.03681
553	0.0433	553	0.04444	553	0.03703
552	0.04353	552	0.04496	552	0.03759
551	0.04354	551	0.04538	551	0.03766
550	0.04387	550	0.04585	550	0.03807
549	0.04454	549	0.04577	549	0.03855
548	0.0447	548	0.04582	548	0.03897
547	0.04457	547	0.04636	547	0.03944
546	0.04492	546	0.04614	546	0.03972
545	0.04496	545	0.04603	545	0.04003
544	0.0449	544	0.04591	544	0.0405
543	0.04479	543	0.04594	543	0.04082
542	0.04437	542	0.04598	542	0.04135
541	0.04467	541	0.04582	541	0.04167
540	0.04424	540	0.04533	540	0.04204
539	0.04398	539	0.04516	539	0.04225
538	0.04364	538	0.04493	538	0.04242
537	0.0434	537	0.04468	537	0.04234
536	0.04302	536	0.04438	536	0.0429
535	0.0425	535	0.0438	535	0.04288
534	0.04189	534	0.04334	534	0.04304
533	0.04201	533	0.04281	533	0.04345
532	0.04152	532	0.04271	532	0.0433
531	0.04136	531	0.0422	531	0.04353
530	0.04079	530	0.04194	530	0.04334
529	0.04046	529	0.0416	529	0.04357
528	0.04033	528	0.04109	528	0.04367
527	0.03959	527	0.04075	527	0.04334
526	0.03946	526	0.04035	526	0.0437
525	0.03938	525	0.03975	525	0.04373
524	0.0391	524	0.03942	524	0.04387
523	0.0389	523	0.03936	523	0.04391
522	0.0388	522	0.03876	522	0.04407
521	0.0391	521	0.03849	521	0.04444
520	0.03933	520	0.03856	520	0.04437
519	0.03973	519	0.03849	519	0.04474
518	0.0399	518	0.03832	518	0.0449
517	0.04027	517	0.03832	517	0.04484
516	0.0404	516	0.03804	516	0.0453
515	0.04059	515	0.03739	515	0.04593
514	0.04084	514	0.03809	514	0.04623
513	0.04175	513	0.03828	513	0.04628
512	0.04235	512	0.03797	512	0.04666
511	0.04294	511	0.0384	511	0.04717
510	0.04337	510	0.03796	510	0.04784
509	0.04433	509	0.03773	509	0.04829
508	0.04441	508	0.0381	508	0.04904
507	0.04575	507	0.03839	507	0.0493
506	0.04651	506	0.03884	506	0.04993
505	0.04773	505	0.03873	505	0.05079
504	0.04837	504	0.03868	504	0.05131
503	0.04926	503	0.03918	503	0.05237
502	0.04993	502	0.03974	502	0.05278
501	0.05164	501	0.04018	501	0.05333
500	0.05292	500	0.04035	500	0.05433
499	0.05405	499	0.04045	499	0.05492
498	0.05472	498	0.0416	498	0.05573
497	0.05664	497	0.04203	497	0.05651
496	0.05715	496	0.04245	496	0.05725
495	0.05838	495	0.04298	495	0.0579
494	0.05981	494	0.04351	494	0.05923
493	0.06063	493	0.04473	493	0.05992
492	0.06199	492	0.04517	492	0.06109
491	0.06295	491	0.04695	491	0.06172
490	0.06468	490	0.04791	490	0.06318
489	0.0668	489	0.04913	489	0.06481
488	0.06802	488	0.04999	488	0.06591
487	0.06983	487	0.05177	487	0.06721
486	0.07138	486	0.0535	486	0.06875
485	0.07306	485	0.05542	485	0.0703
484	0.07482	484	0.05759	484	0.07195
483	0.07647	483	0.05936	483	0.07448
482	0.07865	482	0.06135	482	0.07658
481	0.08092	481	0.06319	481	0.07892
480	0.0829	480	0.0658	480	0.08096
479	0.08515	479	0.06766	479	0.08374
478	0.0879	478	0.07019	478	0.08664
477	0.09086	477	0.07298	477	0.08977
476	0.09362	476	0.07592	476	0.0931
475	0.09725	475	0.07859	475	0.09671
474	0.10023	474	0.08168	474	0.10111
473	0.10399	473	0.08532	473	0.10552
472	0.10826	472	0.08879	472	0.11112
471	0.11281	471	0.09268	471	0.11675
470	0.11703	470	0.09681	470	0.12415
469	0.12188	469	0.10076	469	0.13209
468	0.1275	468	0.1056	468	0.14038
467	0.13312	467	0.11036	467	0.15064
466	0.13882	466	0.11598	466	0.1625
465	0.1446	465	0.12173	465	0.17475
464	0.15126	464	0.12832	464	0.1879
463	0.1582	463	0.13434	463	0.20266
462	0.16161	462	0.14001	462	0.21816
461	0.17325	461	0.14433	461	0.23395
460	0.18128	460	0.15646	460	0.24992
459	0.18907	459	0.16392	459	0.26621
458	0.1979	458	0.1724	458	0.2823
457	0.2067	457	0.18037	457	0.29665
456	0.21517	456	0.18837	456	0.31089
455	0.22321	455	0.19711	455	0.3231
454	0.23093	454	0.20373	454	0.33396
453	0.2383	453	0.21081	453	0.34322
452	0.24471	452	0.2167	452	0.35109
451	0.25012	451	0.22256	451	0.35727
450	0.255	450	0.22649	450	0.36133
449	0.25828	449	0.22871	449	0.36324
448	0.26044	448	0.23079	448	0.36334
447	0.2632	447	0.23152	447	0.36177
446	0.26312	446	0.23023	446	0.35804
445	0.26245	445	0.22853	445	0.35198
444	0.2606	444	0.22514	444	0.34546
443	0.25731	443	0.22213	443	0.33907
442	0.25421	442	0.21792	442	0.33172
441	0.25046	441	0.21312	441	0.32344
440	0.24666	440	0.20768	440	0.31539
439	0.24186	439	0.20191	439	0.30717
438	0.23692	438	0.19565	438	0.29923
437	0.23304	437	0.19077	437	0.29191
436	0.22776	436	0.18495	436	0.2841
435	0.22312	435	0.17973	435	0.27756
434	0.21815	434	0.17384	434	0.27166
433	0.21372	433	0.16963	433	0.26642
432	0.20892	432	0.16506	432	0.261
431	0.20396	431	0.16108	431	0.25604
430	0.19897	430	0.15699	430	0.25026
429	0.19372	429	0.15344	429	0.24528
428	0.18879	428	0.15042	428	0.23971
427	0.18378	427	0.14682	427	0.23452
426	0.17883	426	0.14396	426	0.22899
425	0.17395	425	0.14095	425	0.22364
424	0.16877	424	0.13828	424	0.2186
423	0.16377	423	0.13557	423	0.21422
422	0.15924	422	0.13321	422	0.20927
421	0.15477	421	0.12976	421	0.20443
420	0.15023	420	0.12792	420	0.19958
419	0.14653	419	0.12527	419	0.19553
418	0.14253	418	0.12326	418	0.19236
417	0.13911	417	0.12097	417	0.18853
416	0.13597	416	0.11876	416	0.18537
415	0.13291	415	0.11665	415	0.18136
414	0.12939	414	0.11446	414	0.17829
413	0.12552	413	0.11268	413	0.17653
412	0.12286	412	0.11047	412	0.17486
411	0.12009	411	0.10839	411	0.17343
410	0.11774	410	0.10692	410	0.17136
409	0.11552	409	0.10534	409	0.17103
408	0.11299	408	0.10423	408	0.17067
407	0.11125	407	0.10306	407	0.17064
406	0.10952	406	0.10196	406	0.17091
405	0.10765	405	0.10095	405	0.1724
404	0.10587	404	0.10055	404	0.1736
403	0.10449	403	0.09905	403	0.17548
402	0.1038	402	0.09832	402	0.17727
401	0.10233	401	0.09779	401	0.17996
400	0.10161	400	0.09763	400	0.18334
399	0.10086	399	0.09778	399	0.18665
398	0.10046	398	0.09785	398	0.18972
397	0.10041	397	0.09773	397	0.1931
396	0.1006	396	0.09786	396	0.19638
395	0.10087	395	0.09799	395	0.1992
394	0.1016	394	0.09904	394	0.20118
393	0.10255	393	0.10005	393	0.20312
392	0.10292	392	0.10094	392	0.20431
391	0.10409	391	0.10211	391	0.20449
390	0.1054	390	0.10402	390	0.20503
389	0.10675	389	0.10608	389	0.20362
388	0.1087	388	0.10787	388	0.20184
387	0.11171	387	0.11017	387	0.20045
386	0.11369	386	0.11331	386	0.1985
385	0.11591	385	0.1155	385	0.19617
384	0.11916	384	0.11738	384	0.19425
383	0.12127	383	0.12028	383	0.19265
382	0.12469	382	0.12378	382	0.19033
381	0.12775	381	0.12645	381	0.18861
380	0.13114	380	0.12992	380	0.18795
379	0.13566	379	0.13561	379	0.1828
378	0.1381	378	0.1388	378	0.17813
377	0.13683	377	0.1388	377	0.18251
376	0.13984	376	0.1446	376	0.18193
375	0.1437	375	0.14941	375	0.18056
374	0.14839	374	0.15471	374	0.18158
373	0.15119	373	0.15891	373	0.1799
372	0.15222	372	0.16559	372	0.17796
371	0.15653	371	0.16862	371	0.17644
370	0.15957	370	0.16883	370	0.17602
369	0.16199	369	0.17309	369	0.17635
368	0.16219	368	0.17599	368	0.17635
367	0.16531	367	0.17672	367	0.17415
366	0.16703	366	0.18043	366	0.17586
365	0.17013	365	0.18455	365	0.17414
364	0.17343	364	0.18676	364	0.17132
363	0.17431	363	0.1886	363	0.17146
362	0.17377	362	0.19328	362	0.1707
361	0.17423	361	0.19235	361	0.16865
360	0.17699	360	0.19229	360	0.16671
359	0.17777	359	0.19412	359	0.1683
358	0.17719	358	0.19431	358	0.16722
357	0.17719	357	0.19607	357	0.1625
356	0.17803	356	0.1998	356	0.16117
355	0.17639	355	0.20161	355	0.15997
354	0.17399	354	0.20082	354	0.16079
353	0.17641	353	0.19816	353	0.16017
352	0.17581	352	0.19581	352	0.15601
351	0.17139	351	0.19576	351	0.1569
350	0.16896	350	0.19487	350	0.15731
349	0.16903	349	0.19098	349	0.15565
348	0.16783	348	0.18825	348	0.15352
347	0.16151	347	0.18802	347	0.15319
346	0.15781	346	0.18792	346	0.15553
345	0.15956	345	0.18693	345	0.15559
344	0.15912	344	0.18483	344	0.15437
343	0.15548	343	0.18273	343	0.15182
342	0.15702	342	0.17975	342	0.15253
341	0.15824	341	0.178	341	0.1478
340	0.15595	340	0.17771	340	0.14828
339	0.15447	339	0.17645	339	0.1516
338	0.155	338	0.17407	338	0.1481
337	0.15625	337	0.17381	337	0.14837
336	0.15222	336	0.17283	336	0.14969
335	0.14712	335	0.17257	335	0.1505
334	0.14824	334	0.17199	334	0.15293
333	0.14662	333	0.1701	333	0.15191
332	0.14847	332	0.16939	332	0.14958
331	0.1552	331	0.16614	331	0.14743
330	0.15166	330	0.16526	330	0.1526
329	0.14624	329	0.16885	329	0.15464
328	0.14611	328	0.16762	328	0.15258
327	0.14748	327	0.16307	327	0.15317
326	0.14657	326	0.15885	326	0.15592
325	0.14568	325	0.15852	325	0.15648
324	0.14129	324	0.1593	324	0.15309
323	0.14441	323	0.1577	323	0.15127
322	0.14799	322	0.15654	322	0.15327
321	0.14274	321	0.15807	321	0.14831
320	0.14611	320	0.1561	320	0.14671
319	0.15081	319	0.14548	319	0.14429
318	0.15084	318	0.13831	318	0.14124
317	0.1509	317	0.1378	317	0.14033
316	0.15117	316	0.13656	316	0.13903
315	0.15098	315	0.13585	315	0.13935
314	0.15028	314	0.13624	314	0.13864
313	0.14971	313	0.1348	313	0.13885
312	0.14978	312	0.13341	312	0.13921
311	0.14996	311	0.13484	311	0.13881
310	0.14961	310	0.13532	310	0.139
309	0.14901	309	0.13455	309	0.13874
308	0.14884	308	0.13413	308	0.13939
307	0.14802	307	0.13462	307	0.13903
306	0.14729	306	0.13342	306	0.13936
305	0.14772	305	0.13076	305	0.14034
304	0.14694	304	0.13154	304	0.14084
303	0.14717	303	0.13139	303	0.14015
302	0.14609	302	0.131	302	0.14028
301	0.14579	301	0.12998	301	0.14182
300	0.14619	300	0.13007	300	0.14195
299	0.14707	299	0.12963	299	0.14241
298	0.14601	298	0.12934	298	0.14209
297	0.14714	297	0.12929	297	0.14147
296	0.14627	296	0.12871	296	0.14236
295	0.1467	295	0.12931	295	0.14306
294	0.14702	294	0.13107	294	0.14502
293	0.14609	293	0.12937	293	0.14673
292	0.14678	292	0.12925	292	0.14698
291	0.14693	291	0.1295	291	0.14708
290	0.14596	290	0.12972	290	0.14871
289	0.14729	289	0.13091	289	0.15019
288	0.14678	288	0.13139	288	0.15113
287	0.14837	287	0.13062	287	0.15237
286	0.14849	286	0.13255	286	0.15494
285	0.14744	285	0.13188	285	0.15641
284	0.14896	284	0.1316	284	0.16
283	0.14933	283	0.13257	283	0.16106
282	0.14953	282	0.13269	282	0.16225
281	0.14821	281	0.13278	281	0.16389
280	0.14664	280	0.13201	280	0.16644
279	0.14693	279	0.13211	279	0.16801
278	0.14643	278	0.13249	278	0.16877
277	0.1454	277	0.13377	277	0.17001
276	0.14646	276	0.13186	276	0.17279
275	0.14737	275	0.13291	275	0.17253
274	0.14597	274	0.13457	274	0.17268
273	0.1459	273	0.13463	273	0.17422
272	0.14473	272	0.13343	272	0.17712
271	0.14346	271	0.13203	271	0.17792
270	0.1425	270	0.13219	270	0.17802
269	0.14237	269	0.13103	269	0.17938
268	0.14146	268	0.13145	268	0.18111
267	0.1413	267	0.12933	267	0.18076
266	0.1409	266	0.13189	266	0.18267
265	0.14103	265	0.13248	265	0.18273
264	0.13846	264	0.13348	264	0.18445
263	0.13843	263	0.13204	263	0.1855
262	0.13934	262	0.1311	262	0.18572
261	0.13911	261	0.13105	261	0.1868
260	0.13791	260	0.13041	260	0.18668
259	0.13801	259	0.12775	259	0.1868
258	0.13673	258	0.12653	258	0.18671
257	0.13806	257	0.12536	257	0.18399
256	0.13667	256	0.12684	256	0.18267
255	0.13443	255	0.12467	255	0.18272
254	0.13588	254	0.12509	254	0.18438
253	0.13667	253	0.125	253	0.18512
252	0.13366	252	0.12444	252	0.18471
251	0.13473	251	0.12436	251	0.1841
250	0.13253	250	0.12324	250	0.18366
249	0.13319	249	0.1214	249	0.1841
248	0.13552	248	0.12267	248	0.1815
247	0.13496	247	0.12328	247	0.1828
246	0.1354	246	0.12356	246	0.18177
245	0.13463	245	0.12477	245	0.18258
244	0.13601	244	0.12451	244	0.18389
243	0.1377	243	0.12729	243	0.18412
242	0.13754	242	0.12768	242	0.18358
241	0.1381	241	0.1289	241	0.18486
240	0.14027	240	0.13057	240	0.18439
239	0.14185	239	0.13111	239	0.18555
238	0.14261	238	0.13249	238	0.18663
237	0.14318	237	0.13668	237	0.18712
236	0.14279	236	0.13856	236	0.19025
235	0.14371	235	0.13895	235	0.1904
234	0.14713	234	0.14113	234	0.19177
233	0.14701	233	0.14029	233	0.19296
232	0.14951	232	0.14174	232	0.19526
231	0.14984	231	0.14545	231	0.19496
230	0.15028	230	0.14619	230	0.19925
229	0.15379	229	0.14882	229	0.19927
228	0.15441	228	0.14986	228	0.20242
227	0.15601	227	0.15043	227	0.20476
226	0.15384	226	0.15239	226	0.2072
225	0.15744	225	0.15649	225	0.21009
224	0.15964	224	0.15714	224	0.21411
223	0.16161	223	0.1577	223	0.21903
222	0.16205	222	0.16261	222	0.22375
221	0.16165	221	0.16265	221	0.22878
220	0.16601	220	0.16425	220	0.23146
219	0.16601	219	0.1698	219	0.23855
218	0.16841	218	0.17169	218	0.24276
217	0.16923	217	0.17514	217	0.25144
216	0.17107	216	0.1746	216	0.25592
215	0.17311	215	0.17889	215	0.26499
214	0.17446	214	0.18196	214	0.27661
213	0.17912	213	0.19029	213	0.29076
212	0.18436	212	0.189	212	0.30706
211	0.18385	211	0.193	211	0.32982
210	0.1887	210	0.20059	210	0.35543
209	0.18536	209	0.20513	209	0.38755
208	0.18964	208	0.20854	208	0.42297
207	0.19662	207	0.21711	207	0.47716
206	0.20675	206	0.23022	206	0.54232
205	0.20527	205	0.23351	205	0.60593
204	0.21239	204	0.23522	204	0.7066
203	0.21799	203	0.24913	203	0.80349
202	0.22786	202	0.25566	202	0.94572
201	0.23556	201	0.26707	201	1.08702
200	0.23831	200	0.27588	200	1.22469

## Sheet: Fig. 2g
C 1s high-resolution XPS spectra with identification of peaks by curve fitting
CDs									Mn@CDs-12.5			Mn@CDs-25			Mn@CDs-50			Mn@CDs-100
Binding energy (eV)	raw	sum	C=C/C-C	C-N	C-O	C=O/C=N	O-C=O/N-C-O		Binding energy (eV)	Intensity		Binding energy (eV)	Intensity		Binding energy (eV)	Intensity		Binding energy (eV)	Intensity
293	0	142.339	25.568	27.52	23.94	22.007	43.303		292.98	0		292.98	0		292.98	0		292.98	0
292.9	-45.18	147.508	26.195	28.309	24.722	22.897	45.385		292.88	-59.99		292.88	-110.36		292.88	88.22		292.88	37.14
292.8	32.753	152.981	26.845	29.132	25.542	23.843	47.618		292.78	-53.367		292.78	-63.545		292.78	168.035		292.78	-82.853
292.7	22.341	158.781	27.519	29.992	26.404	24.849	50.019		292.68	-35.972		292.68	208.902		292.68	221.375		292.68	18.99
292.6	8.874	164.94	28.219	30.89	27.31	25.919	52.604		292.58	-205.69		292.58	118.386		292.58	166.465		292.58	9.629
292.5	-27.035	171.488	28.946	31.829	28.263	27.059	55.392		292.48	-124.881		292.48	39.201		292.48	160.663		292.48	84.084
292.4	-55.909	178.458	29.701	32.811	29.267	28.276	58.405		292.38	18.818		292.38	61.172		292.38	245.033		292.38	117.552
292.3	-90.412	185.891	30.486	33.839	30.324	29.576	61.666		292.28	107.129		292.28	-10.667		292.28	267.383		292.28	1.912
292.2	73.354	193.829	31.302	34.915	31.439	30.967	65.204		292.18	65.391		292.18	-34.051		292.18	222.883		292.18	-4.635
292.1	15.778	202.327	32.152	36.045	32.618	32.459	69.053		292.08	36.486		292.08	-195.736		292.08	139.805		292.08	-10.042
292	-48.395	211.439	33.037	37.229	33.863	34.06	73.248		291.98	64.655		291.98	-144.033		291.98	47.668		291.98	-58.557
291.9	-164.419	221.229	33.959	38.473	35.182	35.783	77.833		291.88	-51.781		291.88	108.418		291.88	56.98		291.88	-34.517
291.8	-69.058	231.775	34.92	39.78	36.578	37.638	82.859		291.78	13.115		291.78	-109.009		291.78	53.244		291.78	-23.83
291.7	42.779	243.162	35.922	41.155	38.059	39.64	88.389		291.68	-102.084		291.68	-21.232		291.68	119.364		291.68	160.694
291.6	-19.23	255.508	36.967	42.601	39.63	41.805	94.505		291.58	37.902		291.58	-87.87		291.58	147.29		291.58	12.61
291.5	-75.766	268.95	38.059	44.125	41.3	44.15	101.315		291.48	40.273		291.48	84.115		291.48	148.143		291.48	-5.901
291.4	-41.615	283.679	39.2	45.731	43.078	46.698	108.972		291.38	-11.492		291.38	7.255		291.38	206.727		291.38	64.75
291.3	53.006	299.959	40.392	47.427	44.972	49.47	117.697		291.28	-61.82		291.28	103.164		291.28	359.817		291.28	47.729
291.2	210.372	318.173	41.64	49.218	46.994	52.494	127.828		291.18	50.7		291.18	7.9		291.18	363.388		291.18	123.122
291.1	123.26	338.913	42.947	51.113	49.154	55.801	139.9		291.08	48.902		291.08	-47.57		291.08	437.723		291.08	216.76
291	124.681	363.057	44.315	53.117	51.464	59.426	154.733		290.98	73.58		290.98	32.508		290.98	469.256		290.98	199.242
290.9	180.986	391.949	45.749	55.243	53.941	63.414	173.601		290.88	103.419		290.88	268.54		290.88	386.06		290.88	295.676
290.8	373.725	427.594	47.255	57.498	56.6	67.811	198.431		290.78	17.935		290.78	44.182		290.78	404.095		290.78	312.959
290.7	351.769	472.91	48.836	59.891	59.457	72.674	232.052		290.68	154.304		290.68	104.54		290.68	569.993		290.68	366.738
290.6	383.461	532.085	50.496	62.437	62.535	78.073	278.543		290.58	260.402		290.58	241.038		290.58	549.899		290.58	393.779
290.5	591.439	610.813	52.244	65.149	65.858	84.09	343.474		290.48	254.481		290.48	105.633		290.48	583.799		290.48	435.701
290.4	650.678	716.583	54.082	68.039	69.448	90.818	434.195		290.38	355.03		290.38	226.072		290.38	799.362		290.38	555.428
290.3	848.088	858.795	56.02	71.125	73.338	98.383	559.931		290.28	427.141		290.28	296.979		290.28	907.768		290.28	771.007
290.2	973.554	1048.54	58.061	74.423	77.559	106.933	731.566		290.18	602.988		290.18	582.868		290.18	960.885		290.18	974.757
290.1	1268.26	1298.36	60.218	77.955	82.152	116.692	961.347		290.08	832.817		290.08	608.103		290.08	1176.24		290.08	896.288
290	1767.29	1620.95	62.496	81.743	87.161	127.972	1261.58		289.98	1002.03		289.98	531.43		289.98	1398.93		289.98	1100.33
289.9	2160.65	2027.98	64.904	85.811	92.636	141.282	1643.35		289.88	1057.04		289.88	759.467		289.88	1670.24		289.88	1412.38
289.8	2684.94	2528.33	67.454	90.188	98.635	157.495	2114.56		289.78	1529.15		289.78	1005.69		289.78	1982.97		289.78	1815.26
289.7	3310.74	3126.03	70.156	94.904	105.227	178.139	2677.6		289.68	2038.57		289.68	1268.68		289.68	2341.01		289.68	1875.95
289.6	3798.65	3819.38	73.024	99.998	112.496	205.921	3327.95		289.58	2160.92		289.58	1607.47		289.58	2719.41		289.58	2349.3
289.5	4596.97	4598.89	76.069	105.508	120.533	245.45	4051.32		289.48	2327.79		289.48	1788.88		289.48	3241.03		289.48	2669.95
289.4	5502.55	5447.86	79.308	111.482	129.458	304.301	4823.31		289.38	2829.07		289.38	2349.48		289.38	3922.19		289.38	3306.04
289.3	6362.76	6343.28	82.758	117.973	139.415	394.238	5608.89		289.28	3618.91		289.28	2734.45		289.28	4443.03		289.28	3772.61
289.2	7271.27	7257.32	86.435	125.038	150.593	532.32	6362.94		289.18	4250.13		289.18	2820.33		289.18	5066.15		289.18	4428.46
289.1	8162.47	8161.14	90.361	132.75	163.266	741.666	7033.09		289.08	4587.2		289.08	3694.59		289.08	5623.83		289.08	4710.04
289	8820.78	9026.62	94.559	141.189	177.833	1050.53	7562.51		288.98	5133.71		288.98	4203.61		288.98	6278.41		288.98	5158.82
288.9	9773.16	9832.47	99.055	150.447	194.932	1489.74	7898.28		288.88	5619.73		288.88	4914.47		288.88	6654.81		288.88	5975.48
288.8	10217.3	10569.9	103.877	160.633	215.608	2087.47	8002.27		288.78	6261.75		288.78	5349.48		288.78	7049.75		288.78	6436.18
288.7	11394.2	11245.8	109.055	171.873	241.593	2861.42	7861.89		288.68	7112.81		288.68	5628.02		288.68	7799.23		288.68	7161.98
288.6	12044.9	11879.8	114.628	184.33	275.769	3811.06	7494.05		288.58	7727.86		288.58	6363.67		288.58	8242.43		288.58	7704.22
288.5	12777.5	12489.6	120.636	198.193	322.753	4908.09	6939.87		288.48	8178.39		288.48	6809.08		288.48	8548.32		288.48	8484.4
288.4	13358.3	13076	127.124	213.716	389.732	6091.94	6253.47		288.38	8901.64		288.38	7306.47		288.38	8952.7		288.38	9080.68
288.3	13931.8	13612.5	134.144	231.251	487.403	7268.43	5491.27		288.28	9293.95		288.28	7547.14		288.28	9273.31		288.28	9732.47
288.2	14132.6	14043	141.754	251.304	630.825	8313.81	4705.33		288.18	10243.4		288.18	8129.93		288.18	9543.34		288.18	10386.7
288.1	13950	14292.5	150.024	274.694	840.204	9088.92	3938.67		288.08	10737		288.08	8549.99		288.08	9629.63		288.08	10778.2
288	13867.8	14293.1	159.03	302.721	1140.5	9465.86	3224.98		287.98	10619.5		287.98	9238.4		287.98	9771.22		287.98	10869.3
287.9	14018.3	14027	168.863	337.536	1560.24	9373.26	2587.09		287.88	10921.2		287.88	9344.12		287.88	9405.11		287.88	11052.3
287.8	13466.6	13557.8	179.623	382.664	2128.54	8829.3	2037.62		287.78	11041		287.78	9460.57		287.78	9130.81		287.78	11029.5
287.7	13009.3	13018.6	191.426	443.751	2870.22	7932.85	1580.34		287.68	10739.8		287.68	9746.48		287.68	8942.85		287.68	10525.2
287.6	12937	12566.4	204.42	529.652	3800.56	6820.32	1211.45		287.58	10338.2		287.58	9336.96		287.58	8786.75		287.58	10289.2
287.5	12677.4	12339.9	218.766	653.529	4917.3	5627.76	922.572		287.48	9752.01		287.48	9243		287.48	8831.85		287.48	10334.7
287.4	12719.4	12434.7	234.665	834.158	6195.28	4468.22	702.332		287.38	9666.89		287.38	8686.63		287.38	8976.8		287.38	10283.8
287.3	12763.4	12892.5	252.363	1096.84	7581.97	3423.02	538.32		287.28	10379		287.28	8385.82		287.28	9407.65		287.28	10481.3
287.2	13562.5	13699.8	272.184	1473.43	8995.67	2539.99	418.557		287.18	10655.8		287.18	8843.92		287.18	10180.5		287.18	10873.1
287.1	14796.7	14793.1	294.587	2001.64	10329.3	1835.35	332.258		287.08	11158.2		287.08	9323.31		287.08	11314.2		287.08	11842.9
287	16055.7	16068.3	320.233	2721.21	11454.3	1301.99	270.526		286.98	12448.6		286.98	9601.04		286.98	13283		286.98	13660.7
286.9	16909.5	17400.4	350.163	3669.03	12237.9	916.963	226.286		286.88	14099.3		286.88	10838.4		286.88	15315.6		286.88	15373.5
286.8	18485.2	18672.5	386.07	4871.58	12570.3	650.304	194.206		286.78	15431.7		286.78	11755.1		286.78	17276.5		286.78	16849.8
286.7	19634.5	19808.4	430.724	6335.76	12399.7	471.734	170.438		286.68	17285.8		286.68	13411.5		286.68	19307.3		286.68	19923.2
286.6	20988.7	20791	488.732	8042.2	11753.1	354.704	152.282		286.58	19426.6		286.58	15490.7		286.58	21531.6		286.58	22135
286.5	21778.5	21644.7	567.434	9935.77	10725	278.539	137.932		286.48	21806.1		286.48	17342.1		286.48	23780.6		286.48	24144.2
286.4	23033.4	22401.1	678.278	11923.7	9444.63	228.32	126.195		286.38	23873.2		286.38	19280.1		286.38	25899.5		286.38	26813.6
286.3	23666.3	23068.2	838.359	13875.8	8043.69	194.058	116.302		286.28	25354.3		286.28	21038.3		286.28	27509.7		286.28	29440.6
286.2	23962.3	23616.6	1071.91	15629.3	6638.21	169.471	107.758		286.18	26828.6		286.18	23323.8		286.18	28779.7		286.18	30721
286.1	23904.8	23985.2	1411.81	17004.7	5317.68	150.783	100.241		286.08	27393.8		286.08	24334.2		286.08	29132.1		286.08	31974.5
286	23690.2	24103.2	1899.29	17830.2	4144.41	135.833	93.544		285.98	27554.6		285.98	25887.2		285.98	28835.5		285.98	32133.5
285.9	23525.3	23932.8	2582.57	17987.2	3152.14	123.39	87.521		285.88	27700.6		285.88	26413.9		285.88	28253.7		285.88	31684.5
285.8	22853.7	23508.9	3512.66	17451.6	2349.85	112.747	82.071		285.78	26750.5		285.78	25708.4		285.78	26844.2		285.78	30101.3
285.7	22505.6	22948.1	4735.95	16304	1727.62	103.489	77.116		285.68	26411.9		285.68	25384.1		285.68	25952.3		285.68	29491.1
285.6	22758.4	22413.8	6286.14	14697.1	1262.62	95.34	72.593		285.58	26132.2		285.58	24827.9		285.58	25751.4		285.58	27801.4
285.5	22421.9	22066.3	8170.8	12812.3	926.667	88.117	68.453		285.48	25842.2		285.48	24730.8		285.48	25914.3		285.48	27107.4
285.4	22502.2	22020.9	10361.7	10822.2	690.641	81.677	64.653		285.38	25171.6		285.38	24603.8		285.38	26265.8		285.38	26748.2
285.3	22984.8	22324.1	12786.3	8872.54	528.177	75.911	61.158		285.28	25306.4		285.28	25055.5		285.28	27756		285.28	27251.5
285.2	23273.4	22941.9	15322	7073.73	417.529	70.729	57.935		285.18	26614.8		285.18	26056.9		285.18	29668		285.18	27299.4
285.1	24122.8	23760	17800.8	5496.22	341.929	66.054	54.958		285.08	26840.2		285.08	27448.6		285.08	31430.5		285.08	28246.2
285	24769.1	24591.3	20012.3	4175.62	289.373	61.822	52.202		284.98	27469.2		284.98	28963.4		284.98	33469		284.98	28393.8
284.9	24950.7	25199.8	21724.6	3115.96	251.64	57.98	49.646		284.88	27363.8		284.88	31304.7		284.88	34777		284.88	28019.2
284.8	24952.4	25344.5	22721.1	2298.2	223.37	54.483	47.272		284.78	27233.4		284.78	32868.4		284.78	34326.8		284.78	27770.2
284.7	24604.5	24844	22857.2	1689.26	201.205	51.29	45.063		284.68	26494.2		284.68	34377.9		284.68	33012.4		284.68	26764.5
284.6	23221.6	23635.8	22111.8	1249.48	183.082	48.366	43.002		284.58	24889.6		284.58	34475.2		284.58	31273.7		284.58	24559.5
284.5	21598.6	21790.8	20596.3	940.005	167.776	45.685	41.08		284.48	22816.7		284.48	34172.9		284.48	28536.1		284.48	22568.8
284.4	19487.9	19474.9	18511.7	726.131	154.539	43.218	39.282		284.38	20559.9		284.38	32910.5		284.38	25527.4		284.38	20149.1
284.3	17088	16891.4	16090.4	579.509	142.907	40.945	37.599		284.28	18252		284.28	29623.3		284.28	21973.4		284.28	17515
284.2	14548.3	14238.2	13552.3	478.545	132.579	38.845	36.021		284.18	15683.8		284.18	26374.9		284.18	18213.5		284.18	15054.5
284.1	11962	11681	11078.6	407.64	123.336	36.902	34.539		284.08	13038		284.08	22551.7		284.08	14862.9		284.08	12571.2
284	9731.93	9346.19	8806.72	356.211	115.023	35.1	33.147		283.98	10604		283.98	19264.2		283.98	11792.3		283.98	10534
283.9	7732.78	7314.17	6824.08	317.317	107.516	33.426	31.837		283.88	8362.93		283.88	15773		283.88	9286.24		283.88	8724.78
283.8	5833.39	5621.37	5171.61	286.581	100.711	31.868	30.601		283.78	6735.69		283.78	12950.3		283.78	7301.57		283.78	6641.34
283.7	4377.81	4267.35	3851.64	261.321	94.528	30.416	29.437		283.68	5331.04		283.68	10012.1		283.68	5480.59		283.68	5072.27
283.6	3342.65	3223.01	2836.83	239.892	88.89	29.062	28.337		283.58	3942.05		283.58	8067.98		283.58	4058.17		283.58	4004.6
283.5	2412.79	2444.04	2083.91	221.302	83.734	27.794	27.297		283.48	3099.37		283.48	6034.24		283.48	2994.58		283.48	3010.89
283.4	1826.89	1879.12	1542.26	204.928	79.011	26.607	26.313		283.38	2410.51		283.38	4584.36		283.38	2262.21		283.38	2314.84
283.3	1367.87	1478.15	1162.24	190.357	74.673	25.496	25.382		283.28	1951.45		283.28	3788.55		283.28	1869.63		283.28	1870.03
283.2	1057.6	1197.19	900.255	177.3	70.68	24.451	24.498		283.18	1535.12		283.18	2743.72		283.18	1562.54		283.18	1255.15
283.1	820.688	1000.42	720.76	165.534	66.996	23.47	23.66		283.08	1108.54		283.08	1853.06		283.08	1208.04		283.08	1011.04
283	565.03	860.953	597.063	154.892	63.59	22.546	22.864		282.98	868.524		282.98	1422.68		282.98	963.336		282.98	928.352
282.9	450.686	759.477	510.029	145.231	60.434	21.674	22.106		282.88	750.06		282.88	1229.14		282.88	852.686		282.88	778.102
282.8	351.033	682.855	446.671	136.438	57.507	20.854	21.387		282.78	666.907		282.78	1011.92		282.78	741.601		282.78	569.142
282.7	299.003	622.529	398.551	128.412	54.786	20.078	20.701		282.68	521.169		282.68	681.393		282.68	685.951		282.68	489.123
282.6	242.541	573.053	360.343	121.066	52.252	19.345	20.048		282.58	447.147		282.58	615.627		282.58	659.989		282.58	352.391
282.5	203.925	531.104	328.816	114.325	49.889	18.651	19.425		282.48	360.446		282.48	478.304		282.48	520.482		282.48	196.79
282.4	12.577	494.63	302	108.126	47.681	17.993	18.83		282.38	324.005		282.38	446.551		282.38	363.903		282.38	273.781
282.3	94.727	462.357	278.695	102.414	45.616	17.37	18.262		282.28	209.626		282.28	252.817		282.28	432.059		282.28	254.84
282.2	77.891	433.467	258.147	97.14	43.682	16.778	17.72		282.18	235.713		282.18	312.878		282.18	351.374		282.18	174.12
282.1	129.465	407.383	239.84	92.258	41.867	16.216	17.201		282.08	231.552		282.08	214.099		282.08	249.864		282.08	218.216
282	152.512	383.706	223.424	87.733	40.163	15.682	16.705		281.98	164.945		281.98	218.079		281.98	263.271		281.98	162.24
281.9	7.613	362.122	208.629	83.531	38.56	15.174	16.23		281.88	185.86		281.88	194.335		281.88	238.155		281.88	90.408
281.8	15.19	342.376	195.242	79.619	37.05	14.689	15.774		281.78	160.679		281.78	53.74		281.78	227.427		281.78	69.147
281.7	115.507	324.265	183.095	75.978	35.628	14.228	15.338		281.68	124.767		281.68	110.831		281.68	204.684		281.68	-18.147
281.6	27.95	307.597	172.03	72.576	34.285	13.788	14.919		281.58	160.488		281.58	73.956		281.58	141.572		281.58	-88.605
281.5	34.966	292.225	161.927	69.397	33.016	13.368	14.517		281.48	120.936		281.48	54.193		281.48	181.927		281.48	-38.531
281.4	72.239	278.015	152.68	66.421	31.817	12.967	14.131		281.38	58.86		281.38	17.604		281.38	249.335		281.38	35.62
281.3	164.87	264.85	144.194	63.632	30.681	12.584	13.761		281.28	0.195		281.28	-43.483		281.28	143.501		281.28	61.995
281.2	39.89	252.631	136.392	61.014	29.605	12.217	13.404		281.18	-4.035		281.18	-14.82		281.18	85.689		281.18	70.74
281.1	15.154	241.262	129.199	58.553	28.583	11.866	13.061		281.08	-17.811		281.08	75.641		281.08	52.501		281.08	-18.202
281	0	230.667	122.555	56.237	27.614	11.53	12.732		280.98	0		280.98	0		280.98	0		280.98	0

## Sheet: Fig. 2h
N 1s high-resolution XPS spectra with identification of peaks by curve fitting
CDs							Mn@CDs-12.5			Mn@CDs-25			Mn@CDs-50			Mn@CDs-100
Binding energy (eV)	raw	sum	Pyridinic N	Pyrrolic N	Graphitic N		Binding energy (eV)	Intensity		Binding energy (eV)	Intensity		Binding energy (eV)	Intensity		Binding energy (eV)	Intensity
405	0	141.223	26.845	85.25	29.128		404.98	0		403.98	0		404.98	0		404.98	0
404.9	32.78	147.209	27.705	88.816	30.687		404.88	112.57		403.88	-143.28		404.88	113.78		404.88	187.01
404.8	166.287	153.601	28.609	92.609	32.384		404.78	30.707		403.78	-91.36		404.78	250.872		404.78	226.631
404.7	124.175	160.442	29.555	96.647	34.24		404.68	56.538		403.68	263.431		404.68	226.529		404.68	220.747
404.6	46.3	167.79	30.55	100.953	36.287		404.58	74.522		403.58	58.316		404.58	218.692		404.58	352.939
404.5	205.96	175.716	31.595	105.551	38.568		404.48	12.315		403.48	135.711		404.48	168.417		404.48	275.701
404.4	69.467	184.308	32.696	110.469	41.143		404.38	149.456		403.38	-3.734		404.38	243.513		404.38	-79.547
404.3	6.557	193.682	33.853	115.734	44.095		404.28	14.864		403.28	293.169		404.28	342.362		404.28	-104.54
404.2	115.769	203.994	35.073	121.38	47.541		404.18	13.479		403.18	171.672		404.18	358.229		404.18	206.665
404.1	366.299	215.453	36.359	127.446	51.648		404.08	236.121		403.08	322.218		404.08	302.072		404.08	164.233
404	174.544	228.336	37.717	133.975	56.645		403.98	112.163		402.98	214.678		403.98	338.019		403.98	335.093
403.9	366.276	243.003	39.151	141.01	62.842		403.88	135.49		402.88	213.218		403.88	292.462		403.88	308.229
403.8	277.381	259.938	40.669	148.609	70.66		403.78	23.385		402.78	150.705		403.78	391.7		403.78	292.801
403.7	440.061	279.749	42.275	156.828	80.647		403.68	284.814		402.68	435.89		403.68	320.476		403.68	299.318
403.6	500.463	303.24	43.977	165.74	93.522		403.58	431.417		402.58	278.162		403.58	425.871		403.58	312.321
403.5	562.27	331.388	45.784	175.425	110.18		403.48	352.643		402.48	410.476		403.48	736.74		403.48	384.846
403.4	586.004	365.392	47.703	185.971	131.718		403.38	300.949		402.38	588.86		403.38	663.275		403.38	446.077
403.3	689.699	406.673	49.743	197.485	159.445		403.28	459.699		402.28	464.231		403.28	569.638		403.28	504.775
403.2	623.294	456.861	51.916	210.088	194.857		403.18	413.053		402.18	417.459		403.18	643.089		403.18	412.676
403.1	616.603	517.818	54.232	223.936	239.65		403.08	475.949		402.08	507.726		403.08	756.782		403.08	550.572
403	823.091	591.511	56.705	239.212	295.593		402.98	621.949		401.98	842.809		402.98	725.757		402.98	710.895
402.9	822.537	679.991	59.35	256.159	364.483		402.88	567.502		401.88	986.837		402.88	801.571		402.88	691.843
402.8	824.262	785.278	62.181	275.103	447.995		402.78	533.305		401.78	948.167		402.78	923.6		402.78	854.765
402.7	905.299	909.234	65.215	296.51	547.509		402.68	502.63		401.68	1067.26		402.68	818.089		402.68	620.345
402.6	1061.18	1053.63	68.474	321.1	664.052		402.58	722.965		401.58	1096.35		402.58	850.494		402.58	902.891
402.5	1150.06	1219.87	71.983	349.96	797.929		402.48	800.486		401.48	1505.27		402.48	912.962		402.48	1054.41
402.4	1374.09	1409.21	75.763	384.794	948.654		402.38	711.266		401.38	1770.82		402.38	989.62		402.38	1070.66
402.3	1472.06	1622.89	79.849	428.274	1114.77		402.28	806.377		401.28	1914.31		402.28	1178.2		402.28	1124.82
402.2	1821.26	1862.43	84.273	484.484	1293.67		402.18	1005.44		401.18	2170.01		402.18	1215.75		402.18	1073.29
402.1	2152.01	2130.47	89.084	559.645	1481.74		402.08	1282.62		401.08	2580.8		402.08	1321.22		402.08	1486.99
402	2214.75	2431.15	94.336	662.781	1674.03		401.98	1086.63		400.98	3173.91		401.98	1353.49		401.98	1622.02
401.9	2612.62	2771.25	100.101	806.638	1864.51		401.88	1027.97		400.88	3621.64		401.88	1374.29		401.88	1773.07
401.8	3113.18	3161.1	106.478	1008.48	2046.14		401.78	1292.91		400.78	4196.88		401.78	1551		401.78	1601.05
401.7	3560.56	3615.2	113.604	1290.55	2211.05		401.68	1560.7		400.68	5026		401.68	2011.81		401.68	1821.48
401.6	4152.63	4153.21	121.679	1680.4	2351.13		401.58	1944.21		400.58	6387.83		401.58	2343.13		401.58	1974.89
401.5	4793.02	4798.91	130.987	2209.57	2458.35		401.48	2263.93		400.48	7127.12		401.48	2375.27		401.48	2051.22
401.4	5537.23	5579.65	141.941	2911.86	2525.84		401.38	2892.14		400.38	8036.16		401.38	2537.41		401.38	2833.81
401.3	6574.62	6523.85	155.141	3819.81	2548.9		401.28	3438.72		400.28	9526.38		401.28	2948.24		401.28	3330.25
401.2	7867.6	7656.9	171.437	4959.61	2525.85		401.18	3767.84		400.18	10859.7		401.18	3369.17		401.18	3679.53
401.1	8967.73	8997.29	192.049	6346.87	2458.38		401.08	4188.59		400.08	12030.2		401.08	4253.55		401.08	4329.83
401	10921.8	10548.2	218.638	7978.41	2351.17		400.98	5009.76		399.98	12284.3		400.98	4967.93		400.98	5059.28
400.9	12492.6	12292.7	253.455	9828.13	2211.1		400.88	5969.38		399.88	12630.7		400.88	5838.72		400.88	5728.4
400.8	14418.8	14188.3	299.46	11842.7	2046.14		400.78	7392.4		399.78	12579.8		400.78	6895.17		400.78	6982.53
400.7	16484.8	16163.9	360.407	13939	1864.57		400.68	8525.98		399.68	12639.5		400.68	7860.45		400.68	8041.4
400.6	18186.8	18122.5	441.001	16007.4	1674.09		400.58	9756.44		399.58	11895.9		400.58	9042.49		400.58	9596.54
400.5	20337.4	19940.3	546.791	17911.7	1481.8		400.48	10963.5		399.48	11615.7		400.48	10222.1		400.48	10922.6
400.4	21372.3	21477.9	684.146	19500	1293.73		400.38	12290.7		399.38	10530.1		400.38	11202.3		400.38	12309.7
400.3	22352.6	22595.8	860.003	20621	1114.77		400.28	13720.9		399.28	9887.02		400.28	12158		400.28	13385.3
400.2	22297.7	23180.6	1081.42	21150.5	948.702		400.18	14822.5		399.18	9148.06		400.18	12822.5		400.18	14253.6
400.1	22752.5	23177.6	1355.27	21024.3	797.971		400.08	15382.4		399.08	7814.25		400.08	12808.7		400.08	15035.7
400	22628.7	22609.3	1687.18	20258.1	664.09		399.98	14783.3		398.98	7615.13		399.98	12702.8		399.98	15398.5
399.9	21601.5	21570.7	2080.91	18942.3	547.542		399.88	14896.6		398.88	7249.02		399.88	12362.3		399.88	15198.8
399.8	20278.2	20200.6	2537.4	17215.2	447.995		399.78	14650.2		398.78	6734.9		399.78	11675.2		399.78	14860.1
399.7	18862.8	18650.1	3053.8	15231.8	364.506		399.68	14094.2		398.68	6610.08		399.68	10755.6		399.68	14207.5
399.6	17829.4	17056.8	3623.37	13137.8	295.613		399.58	13300.6		398.58	6469.9		399.58	9957.52		399.58	12702.7
399.5	16160	15534.3	4234.02	11060.7	239.665		399.48	12151.4		398.48	6290.26		399.48	9338.62		399.48	11637.7
399.4	14728	14164.3	4868.71	9100.73	194.87		399.38	10826.5		398.38	6004.66		399.38	8734.02		399.38	10583.2
399.3	13226	12994.2	5505.38	7329.35	159.445		399.28	10030.6		398.28	5704.91		399.28	8052.71		399.28	9892.3
399.2	11905	12038.5	6117.21	5789.57	131.726		399.18	9135.39		398.18	5469.06		399.18	7604.44		399.18	8700.33
399.1	11056.2	11281.5	6674.21	4497.12	110.186		399.08	8388.07		398.08	4852.96		399.08	7415.82		399.08	8153.27
399	10042	10685.2	7143.78	3447.9	93.527		398.98	7765.9		397.98	4175.74		398.98	7318.12		398.98	8090.81
398.9	9692.12	10196.7	7494.23	2621.85	80.651		398.88	7336.7		397.88	3135.06		398.88	7301.53		398.88	8104.8
398.8	9260.21	9758.91	7698.76	1989.48	70.66		398.78	7139.68		397.78	2555.38		398.78	7360.71		398.78	8335.3
398.7	8709.85	9320.53	7740.28	1517.41	62.844		398.68	6752.34		397.68	2226.14		398.68	7460.66		398.68	8397.71
398.6	8530.93	8843.9	7615.18	1172.08	56.646		398.58	6639.76		397.58	1526.99		398.58	7514.5		398.58	8362.47
398.5	8333.01	8309.3	7334.18	923.47	51.65		398.48	6291.89		397.48	1312.05		398.48	7349.4		398.48	7748.3
398.4	7994.94	7713.48	6919.88	746.06	47.542		398.38	5524.24		397.38	979.436		398.38	6475.63		398.38	6970.78
398.3	7287.99	7065.7	6402.12	619.485	44.095		398.28	4656.87		397.28	978.642		398.28	5467.31		398.28	6271.64
398.2	6603.11	6383.03	5813.58	528.309	41.144		398.18	4226.48		397.18	823.826		398.18	4568.03		398.18	5464.06
398.1	6236.75	5685.36	5185.54	461.246	38.57		398.08	3684.29		397.08	291.367		398.08	3890.31		398.08	4430.41
398	5269.85	4993.57	4546.81	410.472	36.288		397.98	2699.85		396.98	487.137		397.98	3186.17		397.98	3186.7
397.9	4790.38	4326.72	3921.8	370.679	34.24		397.88	2055.18		396.88	461.75		397.88	2249.29		397.88	2497.97
397.8	4065	3700.82	3330.07	338.374	32.384		397.78	1597.94		396.78	391.393		397.78	1597.49		397.78	1908.96
397.7	3423.03	3128.22	2786.22	311.309	30.688		397.68	1335.33		396.68	329.718		397.68	1143.45		397.68	1470.65
397.6	2687.89	2616.52	2299.36	288.032	29.128		397.58	1115.88		396.58	194.283		397.58	908.042		397.58	1240.99
397.5	2122.79	2169.76	1874.44	267.626	27.689		397.48	936.023		396.48	50.163		397.48	711.365		397.48	965.792
397.4	1416.64	1788.06	1512.21	249.49	26.354		397.38	807.707		396.38	122.371		397.38	458.066		397.38	561.024
397.3	1287.11	1468.52	1210.2	233.212	25.115		397.28	654.359		396.28	174.271		397.28	315.936		397.28	472.226
397.2	695.016	1206.1	963.627	218.509	23.96		397.18	490.086		396.18	96.392		397.18	269.907		397.18	217.327
397.1	634.06	994.075	766.039	205.153	22.883		397.08	339.76		396.08	-5.1		397.08	236.073		397.08	182.865
397	306.768	825.347	610.493	192.979	21.875		396.98	444.614		395.98	0		396.98	232.895		396.98	132.352
396.9	206.33	692.679	489.899	181.847	20.933		396.88	232.023		396.88	114.555		396.88	114.555		396.88	145.173
396.8	261.107	589.256	397.567	171.641	20.048		396.78	285.678		396.78	81.888		396.78	81.888		396.78	-103.475
396.7	130.08	509.016	327.535	162.263	19.219		396.68	296.323		396.68	49.448		396.68	49.448		396.68	59.651
396.6	122.825	446.702	274.641	153.622	18.439		396.58	189.225		396.58	4.527		396.58	4.527		396.58	222.355
396.5	-138.242	398.049	234.699	145.645	17.705		396.48	135.839		396.48	-26.449		396.48	-26.449		396.48	-151.672
396.4	-34.612	359.635	204.354	138.268	17.014		396.38	123.965		396.38	85.865		396.38	85.865		396.38	174.06
396.3	-111.252	328.814	181.022	131.431	16.361		396.28	198.4		396.28	55.44		396.28	55.44		396.28	122.399
396.2	-75.055	303.598	162.766	125.085	15.746		396.18	101.37		396.18	43.374		396.18	43.374		396.18	-157.899
396.1	37.326	282.504	148.156	119.184	15.164		396.08	49.048		396.08	135.197		396.08	135.197		396.08	-171.404
396	0	264.477	136.177	113.686	14.613		395.98	0		395.98	0		395.98	0		395.98	0
283.9	7732.78	7314.17	6824.08	317.317	107.516		283.88	8362.93		283.88	15773		283.88	9286.24		283.88	8724.78
283.8	5833.39	5621.37	5171.61	286.581	100.711		283.78	6735.69		283.78	12950.3		283.78	7301.57		283.78	6641.34
283.7	4377.81	4267.35	3851.64	261.321	94.528		283.68	5331.04		283.68	10012.1		283.68	5480.59		283.68	5072.27
283.6	3342.65	3223.01	2836.83	239.892	88.89		283.58	3942.05		283.58	8067.98		283.58	4058.17		283.58	4004.6
283.5	2412.79	2444.04	2083.91	221.302	83.734		283.48	3099.37		283.48	6034.24		283.48	2994.58		283.48	3010.89
283.4	1826.89	1879.12	1542.26	204.928	79.011		283.38	2410.51		283.38	4584.36		283.38	2262.21		283.38	2314.84
283.3	1367.87	1478.15	1162.24	190.357	74.673		283.28	1951.45		283.28	3788.55		283.28	1869.63		283.28	1870.03
283.2	1057.6	1197.19	900.255	177.3	70.68		283.18	1535.12		283.18	2743.72		283.18	1562.54		283.18	1255.15
283.1	820.688	1000.42	720.76	165.534	66.996		283.08	1108.54		283.08	1853.06		283.08	1208.04		283.08	1011.04
283	565.03	860.953	597.063	154.892	63.59		282.98	868.524		282.98	1422.68		282.98	963.336		282.98	928.352
282.9	450.686	759.477	510.029	145.231	60.434		282.88	750.06		282.88	1229.14		282.88	852.686		282.88	778.102
282.8	351.033	682.855	446.671	136.438	57.507		282.78	666.907		282.78	1011.92		282.78	741.601		282.78	569.142
282.7	299.003	622.529	398.551	128.412	54.786		282.68	521.169		282.68	681.393		282.68	685.951		282.68	489.123
282.6	242.541	573.053	360.343	121.066	52.252		282.58	447.147		282.58	615.627		282.58	659.989		282.58	352.391
282.5	203.925	531.104	328.816	114.325	49.889		282.48	360.446		282.48	478.304		282.48	520.482		282.48	196.79
282.4	12.577	494.63	302	108.126	47.681		282.38	324.005		282.38	446.551		282.38	363.903		282.38	273.781
282.3	94.727	462.357	278.695	102.414	45.616		282.28	209.626		282.28	252.817		282.28	432.059		282.28	254.84
282.2	77.891	433.467	258.147	97.14	43.682		282.18	235.713		282.18	312.878		282.18	351.374		282.18	174.12
282.1	129.465	407.383	239.84	92.258	41.867		282.08	231.552		282.08	214.099		282.08	249.864		282.08	218.216
282	152.512	383.706	223.424	87.733	40.163		281.98	164.945		281.98	218.079		281.98	263.271		281.98	162.24
281.9	7.613	362.122	208.629	83.531	38.56		281.88	185.86		281.88	194.335		281.88	238.155		281.88	90.408
281.8	15.19	342.376	195.242	79.619	37.05		281.78	160.679		281.78	53.74		281.78	227.427		281.78	69.147
281.7	115.507	324.265	183.095	75.978	35.628		281.68	124.767		281.68	110.831		281.68	204.684		281.68	-18.147
281.6	27.95	307.597	172.03	72.576	34.285		281.58	160.488		281.58	73.956		281.58	141.572		281.58	-88.605
281.5	34.966	292.225	161.927	69.397	33.016		281.48	120.936		281.48	54.193		281.48	181.927		281.48	-38.531
281.4	72.239	278.015	152.68	66.421	31.817		281.38	58.86		281.38	17.604		281.38	249.335		281.38	35.62
281.3	164.87	264.85	144.194	63.632	30.681		281.28	0.195		281.28	-43.483		281.28	143.501		281.28	61.995
281.2	39.89	252.631	136.392	61.014	29.605		281.18	-4.035		281.18	-14.82		281.18	85.689		281.18	70.74
281.1	15.154	241.262	129.199	58.553	28.583		281.08	-17.811		281.08	75.641		281.08	52.501		281.08	-18.202
281	0	230.667	122.555	56.237	27.614		280.98	0		280.98	0		280.98	0		280.98	0

## Sheet: Fig.2i
O 1s high-resolution XPS spectra with identification of peaks by curve fitting
CDs						Mn@CDs-12.5			Mn@CDs-25			Mn@CDs-50			Mn@CDs-100
Binding energy (eV)	raw	sum	C=O	C-O		Binding energy (eV)	Intensity		Binding energy (eV)	Intensity		Binding energy (eV)	Intensity		Binding energy (eV)	Intensity
538.1	0	276.47	40.1	236.37		536.98	0		537.98	0		537.98	0		537.98	0
538	-73.3	285.76	41.27	244.49		536.88	156.79		537.88	0.79		537.88	87.01		537.88	70.04
537.9	-90.12	295.52	42.49	253.03		536.78	185.618		537.78	-279.939		537.78	266.932		537.78	-109.819
537.8	-412.99	305.79	43.77	262.02		536.68	-47.527		537.68	-221.433		537.68	256.213		537.68	-27.55
537.7	-369.55	316.6	45.11	271.49		536.58	129.71		537.58	-116.044		537.58	178.746		537.58	-79.898
537.6	-52.11	327.98	46.51	281.47		536.48	268.862		537.48	362.45		537.48	-71.486		537.48	-144.349
537.5	73.91	339.98	47.97	292.01		536.38	339.778		537.38	373.424		537.38	165.564		537.38	-118.585
537.4	-229.82	352.65	49.5	303.15		536.28	363.348		537.28	278.109		537.28	191.511		537.28	6.736
537.3	-144.88	366.06	51.11	314.95		536.18	499.829		537.18	80.772		537.18	244.85		537.18	158.383
537.2	-83.68	380.24	52.79	327.44		536.08	542.49		537.08	92.79		537.08	222.552		537.08	104.392
537.1	-36.01	395.28	54.56	340.72		535.98	562.368		536.98	408.211		536.98	416.137		536.98	213.258
537	58.23	411.26	56.42	354.84		535.88	666.323		536.88	656.374		536.88	314.321		536.88	215.253
536.9	9.73	428.31	58.39	369.93		535.78	812.145		536.78	275.787		536.78	248.732		536.78	160.591
536.8	-63.86	446.5	60.44	386.06		535.68	836.86		536.68	151.347		536.68	237.728		536.68	167.353
536.7	-28.06	466.04	62.61	403.43		535.58	993.908		536.58	22.221		536.58	221.164		536.58	127.652
536.6	28.89	487.08	64.9	422.18		535.48	1087.93		536.48	292.515		536.48	324.667		536.48	92.391
536.5	65.54	509.89	67.32	442.57		535.38	903.874		536.38	269.283		536.38	525.337		536.38	2.734
536.4	70.35	534.81	69.88	464.94		535.28	855.51		536.28	480.325		536.28	532.602		536.28	21.527
536.3	-19.94	562.21	72.57	489.64		535.18	1076.09		536.18	336.567		536.18	504.433		536.18	250.408
536.2	149.53	592.69	75.43	517.26		535.08	1521.48		536.08	688.353		536.08	504.57		536.08	265.751
536.1	214.87	626.9	78.46	548.44		534.98	1537.9		535.98	560.241		535.98	514.608		535.98	396.26
536	271.51	665.77	81.67	584.09		534.88	1517.25		535.88	566.93		535.88	563.874		535.88	486.04
535.9	452.94	710.51	85.08	625.43		534.78	1830.38		535.78	694.896		535.78	697.521		535.78	521.041
535.8	678.87	762.59	88.72	673.88		534.68	1968.37		535.68	618.751		535.68	654.039		535.68	748.587
535.7	642.55	823.97	92.58	731.39		534.58	2511.17		535.58	1188.34		535.58	901.02		535.58	999.453
535.6	783.48	896.98	96.71	800.27		534.48	2923		535.48	1064.9		535.48	1191.16		535.48	1047.1
535.5	1049.13	984.62	101.11	883.51		534.38	3212.07		535.38	935.121		535.38	1273.45		535.38	1150.48
535.4	925.31	1090.61	105.82	984.79		534.28	3702.92		535.28	855.867		535.28	1365.39		535.28	1269.12
535.3	1205.79	1219.2	110.86	1108.35		534.18	4282.12		535.18	1294.03		535.18	1234.63		535.18	1441.61
535.2	1456.11	1375.78	116.26	1259.52		534.08	5038.19		535.08	1480.59		535.08	1258.03		535.08	1381.9
535.1	1790.34	1566.3	122.06	1444.24		533.98	6006.16		534.98	1712.13		534.98	1568.94		534.98	1644.28
535	1906	1797.84	128.3	1669.54		533.88	6977.81		534.88	2102.88		534.88	1872.09		534.88	2024.12
534.9	2283.95	2078.54	135.04	1943.5		533.78	8388.94		534.78	1977.81		534.78	2106.28		534.78	2304.69
534.8	2654.8	2416.79	142.31	2274.49		533.68	9829.15		534.68	2702.2		534.68	2593.2		534.68	2628.92
534.7	3148.74	2822.47	150.17	2672.3		533.58	11187.7		534.58	2914.23		534.58	2832.85		534.58	3105.87
534.6	3678.07	3305	158.69	3146.31		533.48	12845.3		534.48	3199.9		534.48	3112.4		534.48	3474.01
534.5	4394.25	3874.7	167.95	3706.75		533.38	14417		534.38	3639.17		534.38	3835.07		534.38	3955.32
534.4	5084.17	4541.87	178.03	4363.84		533.28	16393.1		534.28	4277.33		534.28	4488.15		534.28	4705.71
534.3	5920.4	5314.91	189.05	5125.86		533.18	18474.4		534.18	5158.18		534.18	5047.57		534.18	5433.87
534.2	6743.36	6202.7	201.11	6001.6		533.08	20366.2		534.08	5950.18		534.08	5850.15		534.08	6495.35
534.1	7541.54	7210.34	214.36	6995.98		532.98	22536.4		533.98	6999.74		533.98	6808.39		533.98	7865.81
534	8771.79	8342	229	8113		532.88	24431.6		533.88	8357.75		533.88	8277.93		533.88	9071.96
533.9	9913.91	9599.16	245.3	9353.86		532.78	26288.4		533.78	10080.7		533.78	9795.28		533.78	10731.4
533.8	11041	10977.3	263.58	10713.7		532.68	27829		533.68	11362.6		533.68	11258.6		533.68	12448.1
533.7	12574.2	12471.1	284.41	12186.6		532.58	29444.1		533.58	13440.1		533.58	13498.6		533.58	14636.9
533.6	14160	14067.2	308.559	13758.6		532.48	30128.9		533.48	15935.2		533.48	15794.1		533.48	16947.1
533.5	15622	15750.5	337.268	15413.3		532.38	30693.3		533.38	18542.6		533.38	18532		533.38	19507.1
533.4	17125.4	17501.8	372.452	17129.4		532.28	31381.6		533.28	22015.1		533.28	21132.6		533.28	22465.1
533.3	18729.7	19294.4	417.002	18877.4		532.18	31449.4		533.18	25119.3		533.18	25218.7		533.18	25583.6
533.2	20509.1	21102.4	475.373	20627.1		532.08	31634.9		533.08	28856.6		533.08	28514.2		533.08	29117
533.1	22374.9	22893.3	553.949	22339.3		531.98	31796.1		532.98	32304.9		532.98	31481.8		532.98	32617
533	23693.8	24636.2	661.916	23974.3		531.88	31373.9		532.88	35618.3		532.88	35802.5		532.88	35913.3
532.9	25809.9	26300.9	811.942	25488.9		531.78	31226.9		532.78	37636.1		532.78	38483.6		532.78	38833.9
532.8	27690.2	27856.1	1020.4	26835.7		531.68	30582.2		532.68	40484.5		532.68	41298.3		532.68	41177.2
532.7	28914.9	29279.2	1308.33	27970.9		531.58	30117.8		532.58	42720.6		532.58	43979.3		532.58	42992.2
532.6	30718.7	30551.2	1700.11	28851.1		531.48	29531.4		532.48	43866.1		532.48	45238		532.48	44469.5
532.5	31844.3	31665	2223.51	29441.5		531.38	28804.8		532.38	44532.4		532.38	46148		532.38	44817.8
532.4	33147.3	32624.3	2907.46	29716.8		531.28	28312.4		532.28	44772.6		532.28	45458.6		532.28	44448.4
532.3	33951.8	33441.7	3777.28	29664.4		531.18	27378.7		532.18	44621.7		532.18	45125.9		532.18	43523.8
532.2	34994.5	34140.4	4853.81	29286.6		531.08	25442.7		532.08	43382.8		532.08	43614.3		532.08	42656.4
532.1	34907.9	34744.9	6144.35	28600.5		530.98	23609.6		531.98	41463.9		531.98	41684.1		531.98	41076.7
532	36113.6	35277.2	7642.12	27635.1		530.88	22217.6		531.88	39817.6		531.88	40174.4		531.88	38917.1
531.9	36466.7	35748.2	9320.79	26427.4		530.78	19908.5		531.78	37664.6		531.78	38217.3		531.78	36496.2
531.8	36549.6	36150.4	11128	25022.5		530.68	17449.2		531.68	36051.8		531.68	35923.9		531.68	34622.9
531.7	36897.2	36455.7	12991.4	23464.3		530.58	15656.9		531.58	35349.2		531.58	34797.9		531.58	32343.5
531.6	36626.8	36611.6	14811.6	21800		530.48	13616.3		531.48	33842.4		531.48	33710.1		531.48	30810.7
531.5	36516.5	36544.8	16472.9	20071.9		530.38	11144.8		531.38	32838.4		531.38	32460.4		531.38	29229.7
531.4	35954.1	36166	17847.4	18318.6		530.28	9315.15		531.28	31826		531.28	30637.1		531.28	27256
531.3	34839.3	35384.5	18806.7	16577.8		530.18	7555.48		531.18	30156		531.18	29297.8		531.18	25996.1
531.2	33467.8	34128.3	19250.1	14878.2		530.08	5869.78		531.08	28230.5		531.08	27952.2		531.08	24493.5
531.1	31959.9	32373.4	19125.7	13247.8		529.98	4684.95		530.98	26244.3		530.98	25899.8		530.98	22941.1
531	29888.3	30154.5	18448.5	11706		529.88	3689.55		530.88	23710.1		530.88	23621.5		530.88	21283.8
530.9	27420.8	27561.8	17294.1	10267.7		529.78	2891.58		530.78	21355.2		530.78	21520.4		530.78	18628.5
530.8	24709.9	24724.8	15779.4	8945.41		529.68	2314.17		530.68	19200.2		530.68	19320.2		530.68	16163.2
530.7	22510.5	21776.3	14032.7	7743.61		529.58	1895.86		530.58	16598.9		530.58	16622.2		530.58	13986.6
530.6	19179.6	18846.7	12180.9	6665.88		529.48	1498.72		530.48	13991.2		530.48	13884.3		530.48	12113
530.5	16686.8	16041.8	10331.8	5709.98		529.38	1114.44		530.38	11784.2		530.38	11784.5		530.38	10253.1
530.4	14733.9	13443.2	8572.13	4871.08		529.28	922.522		530.28	9687.59		530.28	9638.29		530.28	8446
530.3	11829.1	11111.3	6967.79	4143.54		529.18	830.023		530.18	7997.61		530.18	7597.57		530.18	6852.93
530.2	9301.59	9075.24	5557.07	3518.17		529.08	639.042		530.08	5990.7		530.08	5898.16		530.08	5524.45
530.1	7283.35	7346.3	4359.95	2986.35		528.98	645.228		529.98	4773.31		529.98	4635.55		529.98	4104.23
530	5882.79	5913.15	3375.38	2537.78		528.88	454.562		529.88	3593.99		529.88	3508.68		529.88	3247.03
529.9	4361.39	4751.11	2588.87	2162.24		528.78	250.784		529.78	2858.91		529.78	2743.18		529.78	2565.36
529.8	3343.46	3828.77	1978.31	1850.46		528.68	214.256		529.68	2057.93		529.68	1945.17		529.68	2098.78
529.7	2564.2	3108.18	1515.31	1592.87		528.58	349.549		529.58	1694.02		529.58	1548.33		529.58	1528.85
529.6	2037.3	2553.31	1171.99	1381.32		528.48	88.572		529.48	1538.75		529.48	1319.86		529.48	1003.19
529.5	1457.33	2129.53	921.498	1208.03		528.38	102.489		529.38	1254.91		529.38	775.196		529.38	869.603
529.4	1022.04	1806.89	740.643	1066.24		528.28	244.655		529.28	1153.01		529.28	847.907		529.28	737.091
529.3	829.921	1561.05	610.719	950.33		528.18	49.139		529.18	1009.89		529.18	708.05		529.18	631.835
529.2	758.227	1372.01	516.793	855.22		528.08	-92.386		529.08	554.559		529.08	517.786		529.08	451.044
529.1	547.789	1224.88	447.967	776.914		527.98	134.662		528.98	585.411		528.98	729.755		528.98	260.819
529	449.064	1108.23	396.273	711.954		527.88	115.99		528.88	498.057		528.88	530.139		528.88	267.383
528.9	204.422	1013.77	356.213	657.555		527.78	94.173		528.78	524.648		528.78	255.318		528.78	200.593
528.8	160.209	935.71	324.142	611.567		527.68	82.958		528.68	512.778		528.68	40.499		528.68	190.655
528.7	-26.185	869.769	297.591	572.178		527.58	124.028		528.58	399.075		528.58	93.223		528.58	29.328
528.6	168.573	813.068	275.012	538.057		527.48	117.562		528.48	452.779		528.48	24.47		528.48	170.867
528.5	151.872	763.476	255.371	508.105		527.38	69.268		528.38	225.911		528.38	85.451		528.38	82.87
528.4	242.595	719.475	237.994	481.481		527.28	-122.591		528.28	152.316		528.28	191.581		528.28	-138.756
528.3	126.902	680.037	222.459	457.578		527.18	19.337		528.18	175.212		528.18	197.64		528.18	-14.536
528.2	215.376	644.319	208.439	435.88		527.08	65.892		528.08	385.892		528.08	-95.256		528.08	27.539
528.1	43.67	611.766	195.727	416.039		526.98	0		527.98	206.852		527.98	-91.816		527.98	-53.193
528	-4.25	581.899	184.144	397.755		282.88	750.06		527.88	343.006		527.88	-11.812		527.88	-46.077
527.9	197.853	554.344	173.547	380.797		282.78	666.907		527.78	273.629		527.78	97.549		527.78	32.316
527.8	-62.961	528.847	163.835	365.012		282.68	521.169		527.68	70.556		527.68	119.87		527.68	-8.041
527.7	66.079	505.146	154.902	350.245		282.58	447.147		527.58	164.873		527.58	-77.631		527.58	-72.339
527.6	-81.176	483.077	146.676	336.401		282.48	360.446		527.48	160.902		527.48	-147.086		527.48	-170.712
527.5	-50.616	462.466	139.081	323.385		282.38	324.005		527.38	452.537		527.38	-60.057		527.38	-41.545
527.4	-118.847	443.164	132.051	311.113		282.28	209.626		527.28	364.149		527.28	-43.637		527.28	-115.367
527.3	-47.996	425.075	125.538	299.537		282.18	235.713		527.18	41.444		527.18	-106.123		527.18	-95.203
527.2	127.766	408.074	119.487	288.586		282.08	231.552		527.08	193.959		527.08	37.649		527.08	28.861
527.1	-34.869	392.093	113.864	278.23		281.98	164.945		526.98	0		526.98	0		526.98	0
527	56.465	377.038	108.623	268.415		281.88	185.86		281.88	194.335		281.88	238.155		281.88	90.408
526.9	-32.594	362.831	103.731	259.101		281.78	160.679		281.78	53.74		281.78	227.427		281.78	69.147
526.8	-63.257	349.423	99.161	250.262		281.68	124.767		281.68	110.831		281.68	204.684		281.68	-18.147
526.7	-131.568	336.739	94.881	241.857		281.58	160.488		281.58	73.956		281.58	141.572		281.58	-88.605
526.6	-288.289	324.743	90.874	233.869		281.48	120.936		281.48	54.193		281.48	181.927		281.48	-38.531
526.5	-225.968	313.379	87.114	226.266		281.38	58.86		281.38	17.604		281.38	249.335		281.38	35.62
526.4	-297.97	302.596	83.577	219.018		281.28	0.195		281.28	-43.483		281.28	143.501		281.28	61.995
526.3	-182.436	292.367	80.253	212.114		281.18	-4.035		281.18	-14.82		281.18	85.689		281.18	70.74
526.2	-158.127	282.643	77.121	205.523		281.08	-17.811		281.08	75.641		281.08	52.501		281.08	-18.202
526.1	0	273.402	74.167	199.235		280.98	0		280.98	0		280.98	0		280.98	0

## Sheet: Fig. 3c
MnO		Mn foil		Mn-PC		Mn2O3		MnS		KMnO4		Mn@CDs
Energy (eV)	Normalized μ(E)	Energy (eV)	Normalized μ(E)	Energy (eV)	Normalized μ(E)	Energy (eV)	Normalized μ(E)	Energy (eV)	Normalized μ(E)	Energy (eV)	Normalized μ(E)	Energy (eV)	Normalized μ(E)
6342.95	0.00119	6343.95	0.00134	6342.95	0.00314	6342.95	0.00179	6342.88	0.00148	6342.97	0.00133	6342.95	0.00315
6346.91	0.000996249	6348.94	0.00022948	6346.95	0.00266	6346.97	0.00155	6346.86	0.00117	6346.95	0.000954881	6346.93	0.00255
6350.86	0.000869305	6353.79	0.000757976	6350.76	0.00214	6350.88	0.00139	6350.76	0.00104	6350.84	0.000767832	6350.88	0.00221
6354.77	0.00076901	6358.86	0.000619146	6354.77	0.00185	6354.79	0.00115	6354.6	0.000750646	6354.77	0.000566629	6354.77	0.00178
6358.82	0.000637363	6363.93	0.000339667	6358.84	0.00154	6358.78	0.000967873	6358.74	0.000661588	6358.84	0.000380483	6358.82	0.00146
6362.91	0.000508573	6368.81	-5.88831e-05	6362.93	0.00137	6362.89	0.00077144	6362.84	0.000544937	6362.88	0.000188525	6362.89	0.000983829
6366.86	0.000367756	6373.78	-0.000332351	6366.8	0.000754379	6366.82	0.000581758	6366.8	0.000325954	6366.86	0.000239088	6366.86	0.000786956
6370.74	0.000253047	6378.92	-0.000512141	6370.7	0.00045177	6370.7	0.000424921	6370.68	0.000236932	6370.74	0.000220514	6370.74	0.000423659
6374.79	0.000158814	6383.82	-0.000528184	6374.68	0.000114521	6374.83	0.000468547	6374.69	7.67744e-05	6374.75	-2.3248e-06	6374.73	0.000104277
6378.81	1.13625e-05	6388.77	-0.000765861	6378.83	-8.74814e-05	6378.9	0.000263198	6378.79	-4.85805e-05	6378.86	-7.11968e-05	6378.9	-6.47711e-05
6382.8	-5.8099e-05	6393.87	0.000257962	6382.81	-0.000202034	6382.81	0.000101056	6382.78	-7.39077e-05	6382.85	-0.000181044	6382.85	-0.000359487
6386.77	-5.00387e-05	6398.89	0.000517963	6386.69	-0.000502425	6386.69	7.27687e-06	6386.65	-0.00025306	6386.71	-0.000383849	6386.75	-0.000528213
6390.73	-0.000149706	6403.78	-0.000135259	6390.71	-0.000719672	6390.8	-3.53821e-05	6390.67	-0.00033441	6390.73	-0.000477218	6390.77	-0.000727303
6394.84	-0.000263948	6408.8	-0.000405034	6394.79	-0.000979789	6394.86	-0.000129638	6394.77	-0.000383575	6394.84	-0.000492999	6394.84	-0.00084702
6398.85	-0.000318694	6413.9	-0.000181821	6398.85	-0.00106	6398.91	-0.000264949	6398.78	-0.000456969	6398.8	-0.00057857	6398.85	-0.000992748
6402.75	-0.000367403	6418.86	-0.000630983	6402.75	-0.00104	6402.83	-0.000336787	6402.67	-0.000550735	6402.77	-0.000536093	6402.79	-0.00112
6406.75	-0.000383542	6423.82	-0.00081512	6406.75	-0.00117	6406.81	-0.000386927	6406.58	-0.000628155	6406.75	-0.000396913	6406.71	-0.00136
6410.81	-0.000385175	6428.87	-0.00035365	6410.81	-0.00124	6410.85	-0.000497196	6410.7	-0.000683797	6410.85	-0.000389376	6410.83	-0.00141
6414.94	-0.000379182	6433.97	-0.000644517	6414.94	-0.0014	6414.92	-0.000574975	6414.86	-0.000602535	6414.92	-0.000414005	6414.92	-0.00128
6418.82	-0.000433774	6438.74	-0.000517224	6418.78	-0.00151	6418.78	-0.000656323	6418.78	-0.000627395	6418.82	-0.000530783	6418.84	-0.00128
6422.78	-0.000419283	6443.8	-0.000872909	6422.74	-0.00147	6422.78	-0.000648879	6422.66	-0.000666338	6422.66	-0.000677325	6422.74	-0.00134
6426.85	-0.000413142	6448.88	-0.000104555	6426.82	-0.00129	6426.88	-0.000626239	6426.77	-0.000547508	6426.81	-0.000655168	6426.81	-0.00107
6430.91	-0.000556482	6453.77	-0.000439679	6430.9	-0.00163	6430.93	-0.000821362	6430.84	-0.000786726	6430.9	-0.000621842	6430.91	-0.00132
6434.87	-0.000483074	6458.68	-0.000278389	6434.91	-0.00121	6434.81	-0.000689523	6434.78	-0.000749613	6434.89	-0.000527954	6434.89	-0.00106
6438.74	-0.00045226	6463.77	3.80923e-05	6438.76	-0.00128	6438.76	-0.000677419	6438.72	-0.000530641	6438.74	-0.000569807	6438.78	-0.00102
6442.77	-0.00046995	6468.76	0.000303612	6442.77	-0.00121	6442.79	-0.000655364	6442.67	-0.000475509	6442.77	-0.00055295	6442.67	-0.00118
6446.84	-0.000428736	6473.59	-0.000230708	6446.78	-0.00116	6446.86	-0.000708409	6446.66	-0.000437722	6446.78	-0.000415351	6446.8	-0.000941133
6450.82	-0.00040095	6478.59	0.000615691	6450.8	-0.000923562	6450.82	-0.000620685	6450.72	-0.00034225	6450.74	-0.000432608	6450.8	-0.000815814
6454.63	-0.000343051	6483.65	0.00105	6454.65	-0.000732006	6454.77	-0.000446859	6454.65	-0.00021477	6454.71	-0.0002265	6454.73	-0.000590884
6458.66	-0.000226413	6488.62	0.00174	6458.64	-0.000517562	6458.68	-0.000460612	6458.6	-0.000253255	6458.66	-0.000168405	6458.58	-0.000592265
6462.69	-0.000217498	6493.54	0.00204	6462.71	-0.000396981	6462.73	-0.000314513	6462.6	-7.85867e-05	6462.71	-0.000135327	6462.71	-0.000250988
6466.71	-0.000134765	6498.65	0.00291	6466.77	-0.000111539	6466.75	-0.000270713	6466.65	2.2044e-05	6466.75	-0.000106727	6466.73	-0.000126653
6470.64	-0.000104099	6503.62	0.00256	6470.66	5.869e-05	6470.72	-0.000117523	6470.6	0.00015693	6470.64	3.60584e-05	6470.68	3.70184e-05
6474.45	4.80826e-06	6508.57	0.00374	6474.53	0.000199669	6474.57	-6.51613e-06	6474.38	0.000243201	6474.57	0.000320385	6474.57	0.000371666
6478.49	0.000124819	6513.54	0.00523	6478.55	0.000549264	6478.55	9.01614e-05	6478.47	0.000517304	6478.55	0.000420074	6478.47	0.000435832
6482.63	0.000299407	6518.7	0.00655	6482.67	0.00114	6482.69	0.0002985	6482.55	0.000662579	6482.61	0.000651144	6482.57	0.000864855
6486.64	0.000530001	6523.61	0.00885	6486.68	0.00164	6486.68	0.000477327	6486.6	0.000870905	6486.65	0.000959473	6486.65	0.00154
6490.43	0.000659071	6528.55	0.01288	6490.55	0.00211	6490.55	0.000661081	6490.43	0.00104	6490.51	0.0011	6490.53	0.00185
6494.49	0.000921354	6529.08	0.01331	6494.45	0.00226	6494.55	0.000907836	6494.39	0.0014	6494.51	0.00141	6494.43	0.00215
6498.57	0.00132	6529.6	0.01463	6498.57	0.003	6498.65	0.00129	6498.51	0.00189	6498.57	0.00238	6498.57	0.00273
6502.64	0.00159	6530.14	0.01474	6502.65	0.00345	6502.68	0.00148	6502.58	0.00231	6502.64	0.00234	6502.65	0.00336
6506.53	0.002	6530.66	0.01582	6506.57	0.00417	6506.59	0.00184	6506.47	0.00265	6506.55	0.00288	6506.61	0.00396
6510.47	0.00252	6531.15	0.01663	6510.49	0.00468	6510.53	0.00226	6510.39	0.0032	6510.47	0.00334	6510.47	0.00458
6514.49	0.00321	6531.61	0.01783	6514.57	0.00586	6514.59	0.00281	6514.47	0.00394	6514.51	0.00397	6514.59	0.0056
6518.68	0.00427	6532.11	0.01864	6518.66	0.00671	6518.68	0.00357	6518.58	0.00496	6518.68	0.00491	6518.64	0.00673
6519.65	0.00456	6532.65	0.01934	6519.65	0.00696	6519.71	0.00383	6519.57	0.00527	6519.65	0.00497	6519.63	0.007
6520.65	0.00485	6533.19	0.02172	6520.65	0.00717	6520.67	0.004	6520.61	0.00555	6520.65	0.00525	6520.65	0.00743
6521.64	0.00516	6533.69	0.02323	6521.66	0.00754	6521.68	0.00426	6521.58	0.00587	6521.68	0.00552	6521.64	0.0077
6522.63	0.0055	6534.21	0.02532	6522.65	0.00782	6522.65	0.00441	6522.57	0.00614	6522.63	0.00583	6522.65	0.00807
6523.59	0.00592	6534.75	0.02797	6523.63	0.00823	6523.65	0.00468	6523.55	0.00662	6523.61	0.00607	6523.63	0.00839
6524.56	0.00631	6535.24	0.03103	6524.58	0.00848	6524.58	0.00493	6524.52	0.00713	6524.58	0.00644	6524.58	0.00889
6525.52	0.00676	6535.73	0.03475	6525.58	0.00905	6525.58	0.00518	6525.48	0.00751	6525.56	0.00689	6525.56	0.0094
6526.53	0.00732	6536.26	0.04117	6526.55	0.00937	6526.55	0.00549	6526.45	0.00797	6526.53	0.00729	6526.55	0.00981
6527.51	0.00796	6536.76	0.0497	6527.53	0.00987	6527.55	0.00598	6527.43	0.0086	6527.53	0.00777	6527.51	0.01041
6528.48	0.00864	6537.26	0.06255	6528.52	0.01028	6528.52	0.0064	6528.39	0.00932	6528.51	0.00839	6528.51	0.01086
6529.06	0.00906	6537.78	0.08337	6529.08	0.01051	6529.12	0.00671	6529	0.00979	6529.06	0.00868	6529.02	0.01123
6529.5	0.00943	6538.22	0.11603	6529.58	0.01092	6529.6	0.00694	6529.52	0.01009	6529.58	0.00899	6529.6	0.01159
6530.06	0.00991	6538.72	0.16994	6530.1	0.01124	6530.08	0.00717	6529.94	0.01033	6530.08	0.00934	6530.08	0.01196
6530.56	0.01041	6539.24	0.22963	6530.64	0.01157	6530.56	0.00745	6530.52	0.01083	6530.56	0.00972	6530.62	0.01255
6531.1	0.01105	6539.7	0.27897	6531.15	0.01188	6531.14	0.00784	6531.02	0.01134	6531.14	0.01028	6531.1	0.01284
6531.59	0.01167	6540.2	0.32155	6531.65	0.01224	6531.63	0.00813	6531.45	0.01176	6531.59	0.01068	6531.63	0.01332
6532.09	0.01228	6540.68	0.35392	6532.11	0.01257	6532.11	0.00843	6532.03	0.01242	6532.11	0.01113	6532.11	0.01372
6532.63	0.01292	6541.16	0.38202	6532.65	0.01294	6532.69	0.00888	6532.57	0.01307	6532.63	0.01178	6532.65	0.01429
6533.13	0.01363	6541.66	0.40637	6533.19	0.01346	6533.19	0.0091	6533.07	0.01379	6533.19	0.01256	6533.17	0.01498
6533.61	0.01439	6542.16	0.42256	6533.69	0.01406	6533.69	0.0095	6533.57	0.01457	6533.63	0.01328	6533.65	0.01549
6534.15	0.01532	6542.6	0.43271	6534.21	0.01455	6534.21	0.01008	6534.09	0.01543	6534.17	0.0142	6534.17	0.01619
6534.69	0.01626	6543.08	0.44029	6534.67	0.01495	6534.73	0.0106	6534.59	0.0164	6534.67	0.0153	6534.71	0.01695
6535.17	0.01735	6543.6	0.45162	6535.17	0.01559	6535.19	0.0112	6535.11	0.01756	6535.17	0.01651	6535.2	0.01787
6535.66	0.01854	6544.08	0.46629	6535.66	0.01639	6535.73	0.01194	6535.62	0.01881	6535.69	0.01796	6535.66	0.0188
6536.2	0.02	6544.52	0.48306	6536.16	0.01719	6536.22	0.01282	6536.1	0.02038	6536.2	0.01975	6536.2	0.02001
6536.7	0.02166	6545	0.49914	6536.76	0.01858	6536.74	0.01398	6536.6	0.0222	6536.72	0.02196	6536.7	0.02157
6537.16	0.02369	6545.6	0.51358	6537.24	0.02016	6537.26	0.01547	6537.1	0.02446	6537.2	0.02448	6537.22	0.02352
6537.72	0.0264	6546.06	0.52833	6537.68	0.02227	6537.72	0.01759	6537.62	0.02751	6537.68	0.0279	6537.68	0.02616
6538.22	0.02981	6546.57	0.54663	6538.22	0.02548	6538.22	0.02065	6538.16	0.0316	6538.2	0.03234	6538.16	0.02982
6538.7	0.03468	6547.07	0.56869	6538.7	0.03019	6538.7	0.02537	6538.6	0.03728	6538.68	0.03836	6538.68	0.03526
6539.2	0.04225	6547.51	0.59662	6539.18	0.03824	6539.14	0.03325	6539.1	0.04601	6539.2	0.04742	6539.2	0.04471
6539.66	0.05116	6548.01	0.62794	6539.68	0.05037	6539.7	0.04275	6539.64	0.05734	6539.66	0.06003	6539.68	0.0562
6540.14	0.05864	6548.53	0.6617	6540.2	0.06506	6540.24	0.05197	6540.1	0.06795	6540.2	0.08004	6540.2	0.06397
6540.66	0.064	6549.15	0.6983	6540.68	0.07432	6540.68	0.05821	6540.64	0.07455	6540.64	0.1115	6540.66	0.064
6541.14	0.06713	6549.65	0.73401	6541.14	0.07441	6541.18	0.06192	6541.1	0.07925	6541.14	0.15957	6541.16	0.06223
6541.64	0.07186	6550.13	0.76982	6541.68	0.0669	6541.62	0.06701	6541.54	0.08833	6541.64	0.24099	6541.62	0.06225
6542.06	0.08278	6550.64	0.80555	6542.16	0.06122	6542.14	0.07322	6542.04	0.10664	6542.12	0.37063	6542.1	0.0658
6542.54	0.10226	6551.14	0.83896	6542.58	0.0601	6542.56	0.07865	6542.5	0.13508	6542.56	0.55611	6542.56	0.07298
6543.06	0.13403	6551.68	0.87265	6543.1	0.06186	6543.08	0.08317	6543.02	0.17979	6543.06	0.71833	6543.1	0.08523
6543.56	0.18036	6552.2	0.90376	6543.62	0.06721	6543.62	0.08667	6543.5	0.24075	6543.58	0.69653	6543.56	0.10286
6544.02	0.24477	6552.72	0.93511	6544.06	0.07714	6544.1	0.08983	6543.96	0.31215	6544.06	0.53459	6544.04	0.12903
6544.52	0.32239	6553.19	0.96422	6544.5	0.09155	6544.52	0.09368	6544.5	0.39945	6544.54	0.37921	6544.54	0.16595
6545.04	0.40119	6553.67	0.9925	6545.02	0.10815	6545.06	0.09958	6544.92	0.49171	6545.04	0.28377	6544.98	0.20808
6545.56	0.47652	6554.17	1.01762	6545.52	0.13016	6545.58	0.1087	6545.42	0.59412	6545.52	0.22364	6545.54	0.25763
6545.98	0.53678	6554.71	1.04006	6546.01	0.16278	6546.02	0.12185	6545.94	0.69265	6546.01	0.19055	6546.02	0.31274
6546.51	0.58665	6555.19	1.05728	6546.53	0.21041	6546.53	0.14153	6546.4	0.77836	6546.51	0.17346	6546.51	0.37622
6547.03	0.63458	6555.72	1.07057	6547.03	0.26947	6547.09	0.1696	6546.97	0.86867	6547.05	0.16293	6547.03	0.45125
6547.51	0.68511	6556.22	1.07812	6547.53	0.32253	6547.55	0.20399	6547.43	0.95298	6547.53	0.15694	6547.55	0.53076
6548.01	0.74216	6556.64	1.08111	6548.05	0.36849	6548.01	0.24598	6547.89	1.02289	6548.03	0.15816	6548.01	0.62183
6548.53	0.80103	6557.24	1.07923	6548.53	0.41183	6548.53	0.28907	6548.43	1.07299	6548.53	0.16901	6548.49	0.71479
6549.05	0.86844	6557.63	1.07278	6549.05	0.45964	6549.09	0.33203	6549.01	1.10172	6549.03	0.18562	6549.03	0.80714
6549.57	0.95661	6558.23	1.06463	6549.59	0.51554	6549.57	0.37867	6549.47	1.11435	6549.55	0.2009	6549.59	0.90269
6550.03	1.06495	6558.67	1.05351	6550.07	0.57152	6550.01	0.42834	6549.99	1.11227	6550.07	0.21062	6550.07	0.98862
6550.5	1.18996	6559.15	1.04327	6550.6	0.63164	6550.6	0.48328	6550.5	1.10103	6550.58	0.21885	6550.58	1.07181
6551.1	1.28739	6559.68	1.03437	6551.12	0.68913	6551.16	0.53505	6551.04	1.0871	6551.1	0.22799	6551.1	1.14394
6551.6	1.35391	6560.16	1.02582	6551.6	0.7422	6551.64	0.58886	6551.56	1.07731	6551.6	0.23923	6551.64	1.20396
6552.1	1.40291	6560.64	1.019	6552.1	0.78495	6552.1	0.64682	6552.02	1.07466	6552.12	0.2525	6552.1	1.25066
6552.62	1.44602	6561.11	1.01337	6552.64	0.81645	6552.68	0.71043	6552.56	1.07864	6552.64	0.26682	6552.64	1.2832
6553.1	1.4908	6561.63	1.00842	6553.15	0.84128	6553.19	0.77951	6553.05	1.08462	6553.15	0.28067	6553.15	1.30196
6553.55	1.54289	6562.11	1.00658	6553.63	0.86432	6553.67	0.85203	6553.55	1.08678	6553.63	0.29476	6553.61	1.30871
6554.17	1.59551	6562.6	1.00442	6554.17	0.88658	6554.17	0.92109	6554.05	1.08259	6554.13	0.31179	6554.13	1.3056
6554.59	1.63195	6563.08	1.00336	6554.67	0.90982	6554.63	0.98916	6554.63	1.07508	6554.63	0.33673	6554.69	1.29573
6555.15	1.62076	6563.58	1.00359	6555.17	0.93068	6555.19	1.04743	6555.09	1.06776	6555.15	0.36743	6555.17	1.28114
6555.6	1.55113	6564.07	1.00327	6555.7	0.95092	6555.64	1.10011	6555.56	1.06274	6555.7	0.40361	6555.68	1.26465
6556.22	1.4451	6564.55	1.00413	6556.18	0.97194	6556.2	1.14384	6556.12	1.06111	6556.18	0.44284	6556.22	1.24693
6556.66	1.32903	6565.06	1.00489	6556.7	0.99541	6556.72	1.17959	6556.62	1.06215	6556.7	0.48749	6556.7	1.22845
6557.12	1.21861	6565.54	1.00561	6557.14	1.0206	6557.2	1.20877	6557.08	1.06324	6557.14	0.5397	6557.12	1.21024
6557.67	1.12746	6566.04	1.0071	6557.63	1.04521	6557.71	1.23278	6557.59	1.06203	6557.67	0.59781	6557.59	1.19357
6558.13	1.05516	6566.57	1.0073	6558.15	1.0671	6558.19	1.25526	6558.07	1.05755	6558.17	0.65915	6558.09	1.17858
6558.61	1.00142	6567.07	1.00869	6558.67	1.08621	6558.67	1.27561	6558.57	1.05047	6558.61	0.718	6558.65	1.1661
6559.15	0.96383	6567.56	1.00915	6559.15	1.10324	6559.15	1.28952	6559.05	1.04133	6559.15	0.76753	6559.13	1.15555
6559.6	0.93805	6568.04	1.00978	6559.62	1.11977	6559.66	1.29292	6559.54	1.03198	6559.66	0.80391	6559.6	1.14804
6560.08	0.92025	6568.56	1.01011	6560.06	1.13589	6560.12	1.28435	6560.04	1.02243	6560.14	0.82672	6560.12	1.14263
6560.5	0.90753	6569.07	1.00994	6560.58	1.15077	6560.58	1.26809	6560.52	1.0148	6560.56	0.83752	6560.56	1.13879
6561.05	0.89556	6569.59	1.0094	6561.05	1.1656	6561.05	1.24774	6560.97	1.00912	6561.03	0.84342	6561.05	1.13646
6561.51	0.88292	6570.1	1.00974	6561.55	1.17979	6561.51	1.22812	6561.51	1.00568	6561.57	0.84893	6561.55	1.13468
6562.05	0.87047	6570.6	1.00999	6562.03	1.19267	6562.05	1.21205	6561.95	1.00428	6562.05	0.85674	6562.05	1.13302
6562.52	0.85961	6571.13	1.00965	6562.54	1.20594	6562.6	1.19987	6562.41	1.00428	6562.56	0.86936	6562.56	1.13109
6562.98	0.85345	6571.61	1.0096	6563.04	1.21747	6562.98	1.19169	6562.92	1.00501	6562.96	0.88542	6563	1.12831
6563.48	0.85198	6572.12	1.00874	6563.52	1.22846	6563.56	1.18505	6563.44	1.00619	6563.54	0.90623	6563.5	1.12425
6563.93	0.856	6572.62	1.00991	6564.03	1.23777	6564.05	1.17779	6563.93	1.00745	6563.97	0.93101	6564.01	1.11884
6564.51	0.86447	6573.19	1.00927	6564.47	1.24385	6564.53	1.16974	6564.41	1.00844	6564.45	0.95669	6564.49	1.11181
6564.99	0.87805	6573.67	1.00899	6564.99	1.24711	6565.03	1.16008	6564.93	1.00964	6565.06	0.9828	6564.99	1.10272
6565.5	0.89827	6574.24	1.00937	6565.52	1.24696	6565.54	1.14918	6565.5	1.01095	6565.52	1.00592	6565.52	1.09139
6565.94	0.92435	6574.74	1.00897	6566.02	1.24385	6566.04	1.13777	6565.92	1.01234	6566.02	1.02452	6566	1.07851
6566.51	0.95643	6575.13	1.00976	6566.55	1.23735	6566.55	1.1264	6566.47	1.01431	6566.57	1.03851	6566.55	1.06385
6567.03	0.99013	6575.61	1.01021	6567.05	1.22771	6567.05	1.11558	6566.97	1.0163	6567.03	1.04782	6567.03	1.04771
6567.57	1.02132	6576.18	1.00946	6567.53	1.21492	6567.57	1.10541	6567.47	1.01748	6567.53	1.05369	6567.56	1.03106
6568.06	1.0428	6576.69	1.00037	6568.06	1.20009	6568.06	1.09631	6568	1.01712	6568.04	1.05606	6568.06	1.01388
6568.48	1.05079	6577.15	1.00005	6568.58	1.18404	6568.58	1.08846	6568.42	1.01443	6568.48	1.05553	6568.56	0.99713
6569.07	1.04606	6577.66	0.99995	6569.01	1.16587	6569.13	1.08142	6568.99	1.00916	6569.11	1.05319	6569.11	0.98002
6569.59	1.0314	6578.14	1.00154	6569.61	1.14864	6569.61	1.07584	6569.49	1.00158	6569.59	1.04968	6569.59	0.96383
6570.08	1.01004	6578.59	1.00215	6570.1	1.13131	6570.12	1.07155	6570.04	0.99297	6570.1	1.04626	6570.14	0.94871
6570.62	0.98361	6579.1	1.00364	6570.62	1.11337	6570.66	1.06882	6570.52	0.98336	6570.66	1.04385	6570.6	0.93352
6571.13	0.95673	6579.58	1.00558	6571.13	1.09746	6571.13	1.06768	6571.09	0.97446	6571.13	1.04253	6571.13	0.92012
6571.61	0.93023	6580.05	1.00682	6571.59	1.08241	6571.65	1.06804	6571.53	0.96641	6571.65	1.04235	6571.63	0.90746
6572.1	0.90755	6580.57	1.00943	6572.12	1.0695	6572.16	1.06948	6572.06	0.95917	6572.12	1.04217	6572.14	0.89593
6572.58	0.88976	6581.06	1.01119	6572.64	1.05851	6572.7	1.0715	6572.58	0.95262	6572.66	1.04114	6572.66	0.8857
6573.13	0.87717	6581.59	1.01365	6573.19	1.04916	6573.17	1.07322	6573.01	0.9464	6573.15	1.03987	6573.15	0.87619
6573.67	0.86963	6582.07	1.01639	6573.67	1.04152	6573.65	1.0743	6573.57	0.94039	6573.65	1.03893	6573.61	0.86754
6574.14	0.86524	6582.48	1.0184	6574.16	1.03467	6574.18	1.07428	6574.06	0.9346	6574.14	1.03857	6574.1	0.85997
6574.6	0.8631	6582.96	1.02079	6574.68	1.02841	6574.68	1.07259	6574.58	0.92906	6574.66	1.03934	6574.64	0.85327
6575.13	0.86266	6583.55	1.0236	6575.15	1.02254	6575.19	1.06923	6575.07	0.92416	6575.13	1.04088	6575.11	0.84773
6575.57	0.86306	6584.06	1.02573	6575.63	1.01649	6575.69	1.06394	6575.53	0.92033	6575.57	1.04372	6575.63	0.84338
6576.16	0.86405	6584.59	1.02798	6576.18	1.01038	6576.16	1.05694	6576.08	0.91736	6576.14	1.04802	6576.14	0.83951
6576.65	0.86502	6585.09	1.02966	6576.6	1.004	6576.65	1.04861	6576.59	0.91511	6576.59	1.05394	6576.62	0.83705
6577.13	0.86563	6585.6	1.03025	6577.13	0.99766	6577.13	1.03839	6577.05	0.91357	6577.09	1.06263	6577.13	0.83571
6577.62	0.86537	6586.15	1.0312	6577.62	0.99176	6577.62	1.02769	6577.56	0.91242	6577.62	1.07177	6577.6	0.83558
6578.1	0.86405	6586.61	1.03086	6578.08	0.98624	6578.1	1.01612	6578.02	0.91172	6578.1	1.08159	6578.1	0.83635
6578.59	0.86193	6587.14	1.02901	6578.57	0.98074	6578.59	1.00423	6578.53	0.91136	6578.57	1.09173	6578.57	0.83786
6579.01	0.85964	6587.65	1.0281	6579.01	0.97524	6579.05	0.9925	6578.95	0.91143	6579.03	1.10191	6579.03	0.83988
6579.5	0.85766	6588.16	1.02603	6579.54	0.96985	6579.56	0.98026	6579.44	0.91211	6579.52	1.11232	6579.54	0.84249
6580.03	0.85658	6588.65	1.02216	6580.05	0.96405	6580.05	0.96793	6579.99	0.91341	6580.05	1.12241	6580.05	0.84586
6580.53	0.85682	6589.64	1.01645	6580.51	0.95775	6580.57	0.95586	6580.41	0.91521	6580.51	1.13176	6580.49	0.84942
6581	0.85836	6590.64	1.01004	6580.96	0.95096	6581.06	0.94364	6580.96	0.9175	6581.04	1.14029	6581.02	0.8536
6581.51	0.86093	6591.67	1.00339	6581.51	0.94372	6581.52	0.93191	6581.44	0.91997	6581.51	1.14762	6581.52	0.85779
6582.03	0.86452	6592.67	0.9992	6582.01	0.93601	6582.05	0.92049	6581.87	0.92249	6582.01	1.1541	6581.99	0.86222
6582.5	0.86887	6593.62	0.99502	6582.48	0.92712	6582.52	0.90933	6582.42	0.92552	6582.48	1.15999	6582.5	0.86687
6582.96	0.87403	6594.66	0.99099	6582.96	0.91811	6583.01	0.89919	6582.9	0.92877	6582.92	1.16482	6582.98	0.87162
6583.49	0.88013	6595.64	0.98764	6583.45	0.90826	6583.49	0.88961	6583.43	0.93258	6583.51	1.16943	6583.51	0.87665
6584.04	0.88685	6596.62	0.98336	6584.04	0.89837	6584.06	0.88103	6583.92	0.93703	6584.04	1.1736	6584.06	0.88206
6584.48	0.89358	6597.57	0.97842	6584.52	0.88855	6584.55	0.87347	6584.42	0.94229	6584.42	1.17711	6584.51	0.8873
6585.03	0.90033	6598.55	0.97417	6584.97	0.87807	6585.09	0.86663	6584.97	0.94824	6585.05	1.18078	6585.05	0.89322
6585.58	0.90595	6599.53	0.97157	6585.58	0.86882	6585.54	0.86085	6585.48	0.95473	6585.56	1.18387	6585.58	0.89945
6586.05	0.91034	6600.53	0.96865	6586.05	0.85999	6586.07	0.85603	6585.97	0.96113	6585.99	1.1865	6586.07	0.90584
6586.57	0.91377	6601.53	0.96786	6586.53	0.85212	6586.57	0.85179	6586.45	0.96747	6586.57	1.1889	6586.57	0.91283
6587.08	0.91698	6602.55	0.96888	6587.02	0.84523	6587.12	0.84848	6586.94	0.97359	6587.06	1.19072	6587.08	0.91963
6587.57	0.92112	6603.59	0.97013	6587.59	0.83968	6587.61	0.84561	6587.51	0.97908	6587.59	1.19215	6587.61	0.92706
6588.04	0.92761	6604.57	0.97333	6588.14	0.83523	6588.12	0.84349	6588	0.9841	6588.1	1.19266	6588.1	0.93482
6588.62	0.93727	6605.63	0.97485	6588.62	0.83227	6588.62	0.84199	6588.58	0.98871	6588.62	1.19256	6588.6	0.94264
6589.56	0.96647	6606.67	0.97869	6589.58	0.83031	6589.58	0.84082	6589.5	0.9962	6589.54	1.18972	6589.56	0.95803
6590.62	1.00908	6607.67	0.98299	6590.6	0.83427	6590.62	0.84165	6590.51	1.00296	6590.6	1.18329	6590.6	0.97412
6591.61	1.05559	6608.71	0.9875	6591.59	0.84423	6591.63	0.84501	6591.53	1.00838	6591.61	1.17344	6591.59	0.98891
6592.61	1.09987	6609.72	0.99147	6592.63	0.8594	6592.63	0.85129	6592.53	1.0126	6592.61	1.16037	6592.61	1.00227
6593.58	1.13759	6610.74	0.99629	6593.58	0.87842	6593.6	0.86092	6593.5	1.01662	6593.58	1.14438	6593.56	1.0142
6594.62	1.16488	6611.7	1.00144	6594.62	0.89963	6594.64	0.87341	6594.5	1.02218	6594.6	1.12676	6594.6	1.0258
6595.58	1.18057	6612.72	1.00544	6595.58	0.92082	6595.62	0.88745	6595.5	1.0264	6595.58	1.10811	6595.58	1.03532
6596.53	1.18378	6613.68	1.00901	6596.56	0.94106	6596.58	0.90248	6596.49	1.02686	6596.56	1.08908	6596.53	1.03897
6597.51	1.18154	6614.69	1.01316	6597.47	0.95936	6597.51	0.91741	6597.41	1.02576	6597.49	1.07101	6597.51	1.03853
6598.51	1.17937	6615.61	1.01515	6598.49	0.97323	6598.51	0.93089	6598.41	1.02472	6598.49	1.05472	6598.51	1.03663
6599.47	1.17471	6616.59	1.01746	6599.45	0.98121	6599.47	0.94257	6599.39	1.02405	6599.47	1.04021	6599.45	1.03349
6600.49	1.16271	6617.58	1.01958	6600.47	0.9847	6600.51	0.95378	6600.39	1.02424	6600.49	1.02715	6600.49	1.02933
6601.44	1.14189	6618.56	1.02007	6601.47	0.98548	6601.51	0.96481	6601.4	1.02505	6601.49	1.01775	6601.47	1.0252
6602.51	1.11556	6619.54	1.02024	6602.49	0.9852	6602.53	0.97488	6602.38	1.02611	6602.51	1.01312	6602.49	1.02166
6603.53	1.08825	6620.59	1.02076	6603.53	0.98506	6603.57	0.98361	6603.44	1.02759	6603.53	1.01127	6603.53	1.01977
6604.55	1.06258	6621.64	1.01959	6604.55	0.98531	6604.57	0.99059	6604.42	1.02917	6604.55	1.00704	6604.55	1.01869
6605.57	1.03945	6622.62	1.01813	6605.57	0.98666	6605.63	0.99582	6605.49	1.03001	6605.57	0.99857	6605.59	1.01816
6606.59	1.0198	6623.65	1.01703	6606.59	0.98894	6606.63	0.99951	6606.53	1.02962	6606.59	0.98857	6606.59	1.01753
6607.63	1.00464	6624.65	1.015	6607.63	0.99246	6607.65	1.0022	6607.55	1.02768	6607.65	0.97924	6607.63	1.01705
6608.61	0.99383	6625.7	1.01284	6608.63	0.99645	6608.65	1.00391	6608.57	1.0248	6608.63	0.97097	6608.63	1.01654
6609.63	0.98575	6626.71	1.01106	6609.67	1.00026	6609.67	1.00481	6609.57	1.02108	6609.65	0.96444	6609.65	1.01613
6610.65	0.97665	6627.74	1.00825	6610.68	1.00393	6610.7	1.00506	6610.57	1.01631	6610.65	0.95866	6610.64	1.01532
6611.68	0.96464	6628.73	1.00601	6611.66	1.00686	6611.68	1.00443	6611.58	1.01088	6611.66	0.9541	6611.62	1.01403
6612.66	0.95016	6629.75	1.00357	6612.66	1.00917	6612.7	1.00332	6612.58	1.00462	6612.68	0.95073	6612.68	1.01271
6613.6	0.93582	6630.76	1.00208	6613.64	1.01096	6613.66	1.00185	6613.56	0.99837	6613.6	0.94854	6613.64	1.0108
6614.62	0.92291	6631.71	1.00076	6614.62	1.01216	6614.67	1.00041	6614.56	0.99209	6614.62	0.94737	6614.65	1.00887
6615.57	0.91291	6632.72	1.00023	6615.55	1.01322	6615.59	0.99917	6615.49	0.98648	6615.59	0.94697	6615.59	1.00674
6616.53	0.90666	6633.66	1.00007	6616.55	1.01438	6616.57	0.99837	6616.47	0.98132	6616.57	0.94706	6616.55	1.00458
6617.51	0.90461	6634.65	1.00094	6617.51	1.01554	6617.53	0.99789	6617.45	0.97608	6617.53	0.947	6617.51	1.00266
6618.52	0.90697	6635.62	1.00237	6618.56	1.01712	6618.56	0.9978	6618.44	0.97088	6618.56	0.94687	6618.54	1.00056
6619.48	0.91367	6636.61	1.0042	6619.48	1.01894	6619.5	0.99793	6619.4	0.96526	6619.5	0.94661	6619.48	0.99859
6620.53	0.92442	6637.62	1.00639	6620.53	1.02149	6620.57	0.99835	6620.43	0.95894	6620.55	0.94628	6620.55	0.99685
6621.55	0.93867	6638.61	1.00873	6621.55	1.02399	6621.57	0.9988	6621.49	0.95168	6621.55	0.94606	6621.55	0.99475
6622.58	0.95455	6639.65	1.01122	6622.58	1.02658	6622.62	0.99968	6622.46	0.94423	6622.58	0.9459	6622.56	0.99265
6623.59	0.96936	6640.66	1.01304	6623.61	1.02876	6623.65	1.00101	6623.5	0.93708	6623.61	0.94584	6623.59	0.99076
6624.63	0.98151	6641.65	1.01441	6624.65	1.02995	6624.65	1.00325	6624.55	0.93065	6624.61	0.94577	6624.63	0.98864
6625.66	0.98932	6642.7	1.0154	6625.66	1.03021	6625.7	1.00636	6625.58	0.92633	6625.68	0.94612	6625.64	0.98658
6626.67	0.99212	6643.71	1.01568	6626.65	1.02958	6626.69	1.0099	6626.57	0.92409	6626.67	0.94654	6626.63	0.98451
6627.7	0.99069	6644.75	1.01491	6627.7	1.02845	6627.74	1.01383	6627.61	0.92479	6627.7	0.94736	6627.7	0.98284
6628.73	0.98672	6645.76	1.01354	6628.73	1.02665	6628.73	1.01736	6628.62	0.9286	6628.73	0.9484	6628.7	0.98104
6629.69	0.98228	6646.79	1.01183	6629.69	1.02475	6629.73	1.02014	6629.63	0.93483	6629.71	0.9496	6629.69	0.97949
6630.68	0.97897	6647.77	1.00941	6630.68	1.0231	6630.72	1.02196	6630.58	0.94336	6630.7	0.95083	6630.7	0.9782
6631.69	0.97718	6648.76	1.00711	6631.69	1.02137	6631.69	1.02263	6631.6	0.95357	6631.69	0.95224	6631.69	0.97691
6632.66	0.97659	6649.77	1.00434	6632.68	1.01993	6632.7	1.02249	6632.59	0.96443	6632.68	0.95351	6632.66	0.97583
6633.64	0.9771	6650.75	1.00221	6633.64	1.01869	6633.64	1.02146	6633.54	0.97533	6633.62	0.9547	6633.62	0.97493
6634.61	0.97887	6651.72	0.99987	6634.59	1.01735	6634.63	1.02013	6634.51	0.98598	6634.59	0.95584	6634.59	0.97401
6635.58	0.98295	6652.68	0.9976	6635.58	1.01572	6635.6	1.01866	6635.5	0.99584	6635.58	0.95708	6635.58	0.97357
6636.57	0.98999	6653.65	0.99568	6636.55	1.01435	6636.57	1.01737	6636.51	1.00476	6636.57	0.9585	6636.55	0.97306
6637.54	1.00039	6654.62	0.99379	6637.58	1.01243	6637.56	1.01662	6637.46	1.01218	6637.52	0.96014	6637.54	0.97306
6638.55	1.01387	6655.64	0.9918	6638.55	1.01004	6638.61	1.01669	6638.49	1.01818	6638.55	0.96211	6638.55	0.97315
6639.58	1.02929	6656.59	0.99017	6639.6	1.00744	6639.62	1.01738	6639.5	1.02266	6639.56	0.96433	6639.56	0.97332
6640.61	1.04467	6657.61	0.98872	6640.59	1.00467	6640.64	1.01862	6640.51	1.02611	6640.61	0.96664	6640.59	0.97378
6641.61	1.05792	6658.67	0.98743	6641.61	1.00182	6641.63	1.02031	6641.52	1.02878	6641.61	0.96912	6641.59	0.97446
6642.64	1.06679	6659.67	0.98636	6642.66	0.99901	6642.66	1.02227	6642.58	1.03113	6642.68	0.97176	6642.64	0.97545
6643.67	1.07044	6660.66	0.98571	6643.65	0.99637	6643.71	1.02427	6643.57	1.03335	6643.65	0.97421	6643.65	0.97658
6644.69	1.06883	6661.7	0.98566	6644.69	0.9936	6644.73	1.02598	6644.6	1.03519	6644.69	0.97682	6644.69	0.97804
6645.7	1.06304	6662.7	0.98573	6645.7	0.99141	6645.74	1.02735	6645.61	1.03666	6645.7	0.97941	6645.7	0.97969
6646.71	1.05453	6663.72	0.98597	6646.73	0.9895	6646.77	1.02807	6646.63	1.03734	6646.71	0.98198	6646.73	0.98139
6647.7	1.04451	6664.8	0.98648	6647.73	0.98798	6647.73	1.02776	6647.64	1.03726	6647.73	0.9845	6647.7	0.98302
6648.7	1.03327	6665.78	0.98776	6648.74	0.98696	6648.76	1.02652	6648.61	1.03637	6648.72	0.98714	6648.72	0.98486
6649.71	1.02164	6666.8	0.98949	6649.71	0.98618	6649.75	1.02421	6649.67	1.035	6649.71	0.98961	6649.71	0.9866
6650.69	1.00934	6667.8	0.99112	6650.69	0.98569	6650.73	1.02073	6650.64	1.03291	6650.71	0.99217	6650.69	0.98817
6651.7	0.99667	6668.8	0.99294	6651.7	0.98534	6651.74	1.01643	6651.6	1.03038	6651.68	0.99484	6651.7	0.98981
6652.65	0.98363	6669.73	0.99512	6652.65	0.98533	6652.65	1.01138	6652.57	1.02748	6652.63	0.99737	6652.63	0.99103
6653.61	0.97055	6670.69	0.99755	6653.63	0.98548	6653.65	1.00612	6653.55	1.02438	6653.63	0.99997	6653.63	0.99236
6654.56	0.95754	6671.65	0.99956	6654.6	0.98544	6654.62	1.00034	6654.52	1.02124	6654.6	1.00257	6654.58	0.99353
6655.56	0.94575	6672.68	1.00175	6655.62	0.98555	6655.62	0.99444	6655.49	1.01764	6655.58	1.00513	6655.58	0.99455
6656.53	0.93673	6673.65	1.00395	6656.55	0.9852	6656.59	0.98877	6656.47	1.01397	6656.59	1.00765	6656.55	0.99549
6657.59	0.93166	6674.66	1.00566	6657.59	0.98532	6657.63	0.98341	6657.51	1.01012	6657.59	1.01016	6657.59	0.99637
6658.59	0.93184	6675.6	1.00748	6658.63	0.98543	6658.61	0.97839	6658.5	1.00606	6658.63	1.01266	6658.61	0.99722
6659.62	0.93744	6676.66	1.00878	6659.62	0.98555	6659.65	0.97403	6659.54	1.00202	6659.62	1.01516	6659.62	0.99787
6660.62	0.94787	6677.66	1.00977	6660.64	0.98575	6660.66	0.96992	6660.54	0.99853	6660.62	1.01764	6660.62	0.99845
6661.66	0.96178	6678.67	1.01092	6661.66	0.98595	6661.68	0.96616	6661.58	0.9957	6661.66	1.02003	6661.66	0.99926
6662.68	0.97777	6679.73	1.01176	6662.7	0.98636	6662.72	0.96287	6662.6	0.99373	6662.72	1.02242	6662.7	0.99981
6663.7	0.99517	6680.71	1.01261	6663.72	0.9868	6663.74	0.95984	6663.64	0.99283	6663.72	1.02463	6663.72	1.00036
6664.74	1.01129	6681.76	1.01293	6664.74	0.9871	6664.78	0.95735	6664.65	0.99287	6664.74	1.02659	6664.74	1.00095
6665.74	1.02512	6682.76	1.01342	6665.76	0.98774	6665.78	0.95537	6665.65	0.99372	6665.76	1.02852	6665.74	1.00163
6666.74	1.03602	6683.79	1.01394	6666.76	0.98815	6666.78	0.95404	6666.67	0.99497	6666.76	1.0303	6666.76	1.00216
6667.72	1.04324	6684.79	1.01262	6667.74	0.98844	6667.78	0.95332	6667.65	0.99638	6667.74	1.0319	6667.72	1.00269
6668.73	1.04665	6685.78	1.01338	6668.76	0.98873	6668.76	0.95325	6668.65	0.99761	6668.76	1.03344	6668.76	1.00319
6669.71	1.04612	6686.78	1.01406	6669.71	0.98893	6669.73	0.95387	6669.67	0.99848	6669.71	1.03468	6669.71	1.00356
6670.67	1.04259	6687.79	1.01417	6670.69	0.98916	6670.74	0.95504	6670.61	0.99884	6670.69	1.03589	6670.65	1.00389
6671.59	1.03679	6688.75	1.01405	6671.61	0.98889	6671.65	0.95665	6671.57	0.99877	6671.63	1.03697	6671.63	1.00426
6672.61	1.02946	6690.68	1.0129	6672.65	0.98877	6672.68	0.95887	6672.55	0.99831	6672.63	1.03813	6672.63	1.00474
6673.59	1.02169	6692.63	1.01104	6673.61	0.98837	6673.65	0.9613	6673.51	0.99737	6673.59	1.03918	6673.61	1.00487
6674.59	1.01448	6694.67	1.00788	6674.59	0.98795	6674.64	0.96402	6674.51	0.99616	6674.59	1.04024	6674.57	1.00518
6675.53	1.00807	6696.64	1.00529	6675.6	0.98735	6675.64	0.96686	6675.51	0.99481	6675.55	1.04116	6675.6	1.00553
6676.6	1.00325	6698.73	1.00259	6676.62	0.98686	6676.64	0.96984	6676.51	0.99329	6676.62	1.04194	6676.62	1.00596
6677.6	1.00052	6700.81	1.00003	6677.62	0.98614	6677.64	0.97275	6677.54	0.99193	6677.62	1.04269	6677.6	1.00603
6678.62	1.00004	6702.81	0.9978	6678.65	0.98566	6678.67	0.97589	6678.54	0.99078	6678.62	1.04311	6678.65	1.00654
6679.67	1.00163	6704.79	0.99526	6679.67	0.98504	6679.71	0.97913	6679.59	0.98988	6679.69	1.04351	6679.69	1.00695
6680.67	1.00466	6706.77	0.99309	6680.71	0.98467	6680.71	0.98232	6680.61	0.98968	6680.71	1.04369	6680.69	1.00732
6681.72	1.00858	6708.73	0.99144	6681.74	0.98449	6681.74	0.98559	6681.61	0.98969	6681.74	1.04363	6681.74	1.00783
6682.7	1.01247	6710.67	0.99091	6682.72	0.98444	6682.74	0.98892	6682.66	0.99037	6682.72	1.04353	6682.72	1.00827
6683.75	1.01621	6712.63	0.99146	6683.77	0.98479	6683.79	0.99222	6683.7	0.99131	6683.79	1.04321	6683.77	1.00859
6684.75	1.01999	6714.64	0.99257	6684.75	0.98495	6684.77	0.99538	6684.69	0.99245	6684.77	1.04269	6684.77	1.00898
6685.76	1.0241	6716.73	0.99394	6685.76	0.98566	6685.82	0.99846	6685.69	0.9937	6685.74	1.04199	6685.8	1.00933
6686.74	1.02869	6718.74	0.99493	6686.74	0.98656	6686.76	1.00131	6686.66	0.99498	6686.74	1.04131	6686.76	1.00954
6687.75	1.03377	6720.8	0.99583	6687.77	0.98763	6687.79	1.004	6687.64	0.99621	6687.77	1.04044	6687.77	1.00983
6688.71	1.03875	6722.76	0.99648	6688.75	0.9889	6688.75	1.00638	6688.65	0.99722	6688.73	1.03944	6688.71	1.00981
6690.6	1.04754	6724.82	0.99735	6690.68	0.99186	6690.66	1.01055	6690.6	0.99915	6690.64	1.03692	6690.66	1.01011
6692.59	1.05277	6726.71	0.99802	6692.65	0.9958	6692.63	1.0141	6692.53	1.00065	6692.61	1.03459	6692.61	1.01027
6694.56	1.05246	6728.7	0.9993	6694.63	0.99903	6694.61	1.01667	6694.52	1.00086	6694.59	1.03033	6694.63	1.00958
6696.62	1.04761	6730.65	1.00024	6696.62	1.00332	6696.64	1.01779	6696.54	1.00036	6696.64	1.02714	6696.64	1.00941
6698.62	1.03749	6732.61	1.0011	6698.73	1.00802	6698.73	1.01832	6698.58	0.99831	6698.68	1.02344	6698.7	1.00891
6700.7	1.02273	6734.67	1.00224	6700.74	1.01209	6700.77	1.01816	6700.64	0.99551	6700.74	1.01956	6700.74	1.00813
6702.74	1.00433	6736.71	1.00298	6702.77	1.01575	6702.79	1.01741	6702.7	0.99335	6702.79	1.01561	6702.77	1.00718
6704.77	0.98414	6738.78	1.00382	6704.79	1.01862	6704.81	1.01572	6704.68	0.99299	6704.79	1.01209	6704.79	1.00627
6706.73	0.96478	6740.82	1.00456	6706.79	1.02082	6706.77	1.01293	6706.68	0.9947	6706.7	1.0087	6706.75	1.00506
6708.69	0.94871	6742.8	1.00457	6708.75	1.02187	6708.75	1.00938	6708.64	0.99814	6708.71	1.00567	6708.69	1.00387
6710.61	0.93735	6744.79	1.00394	6710.67	1.02189	6710.67	1.00563	6710.56	1.00242	6710.67	1.00277	6710.63	1.00254
6712.57	0.93139	6746.75	1.00308	6712.61	1.0207	6712.63	1.00217	6712.51	1.00666	6712.61	0.99992	6712.61	1.00115
6714.6	0.93177	6748.67	1.00232	6714.66	1.01897	6714.66	0.99974	6714.53	1.0101	6714.64	0.99734	6714.64	0.99979
6716.63	0.9388	6750.64	1.0012	6716.65	1.01651	6716.69	0.99861	6716.56	1.01222	6716.65	0.99483	6716.61	0.99797
6718.7	0.95136	6752.67	0.9999	6718.74	1.01376	6718.74	0.99909	6718.61	1.01321	6718.7	0.9925	6718.74	0.99717
6720.73	0.96616	6754.7	1.00001	6720.75	1.01136	6720.82	1.00074	6720.65	1.01321	6720.75	0.99047	6720.75	0.99612
6722.76	0.97967	6756.71	0.99853	6722.83	1.00939	6722.83	1.00276	6722.68	1.01264	6722.79	0.98865	6722.79	0.99558
6724.76	0.99116	6758.73	0.9977	6724.8	1.00777	6724.76	1.00455	6724.67	1.01205	6724.76	0.987	6724.78	0.99529
6726.73	1.00122	6760.82	0.99769	6726.73	1.00644	6726.77	1.00584	6726.66	1.01176	6726.73	0.98556	6726.73	0.9953
6728.66	1.00958	6762.78	0.99903	6728.72	1.00556	6728.7	1.00633	6728.57	1.01178	6728.7	0.98436	6728.68	0.99565
6730.61	1.0159	6764.77	1.00016	6730.65	1.0048	6730.65	1.00635	6730.55	1.01182	6730.65	0.9833	6730.65	0.99602
6732.61	1.02031	6766.66	1.00032	6732.63	1.00403	6732.65	1.00606	6732.52	1.01163	6732.61	0.98238	6732.61	0.99664
6734.63	1.02251	6768.62	1.00078	6734.65	1.0031	6734.63	1.00589	6734.54	1.01111	6734.61	0.98159	6734.65	0.99734
6736.69	1.02309	6770.61	1.00071	6736.73	1.00218	6736.73	1.00636	6736.61	1.01017	6736.71	0.98107	6736.71	0.99803
6738.71	1.02321	6772.62	1.00069	6738.73	1.001	6738.82	1.00766	6738.69	1.00874	6738.78	0.98076	6738.76	0.99861
6740.76	1.02334	6774.68	1.00028	6740.8	1.00026	6740.8	1.0093	6740.69	1.00663	6740.8	0.98049	6740.78	0.99941
6742.8	1.02288	6776.79	0.99972	6742.78	0.99945	6742.85	1.01126	6742.72	1.00409	6742.78	0.98029	6742.76	0.99995
6744.77	1.02125	6778.77	0.99838	6744.79	0.99894	6744.81	1.01277	6744.66	1.00112	6744.79	0.98035	6744.79	1.0005
6746.71	1.01931	6780.76	0.99665	6746.73	0.9985	6746.77	1.01376	6746.64	0.99822	6746.75	0.98057	6746.75	1.00105
6748.67	1.01805	6782.79	0.99521	6748.67	0.99849	6748.67	1.0146	6748.52	0.99557	6748.67	0.98097	6748.69	1.00156
6750.62	1.01742	6784.75	0.99372	6750.62	0.99839	6750.62	1.01516	6750.53	0.99331	6750.62	0.98144	6750.62	1.00189
6752.62	1.0165	6786.65	0.99272	6752.58	0.99873	6752.67	1.01568	6752.54	0.99186	6752.62	0.98186	6752.65	1.00248
6754.66	1.01389	6788.64	0.99169	6754.7	0.99956	6754.66	1.01606	6754.55	0.99161	6754.66	0.9826	6754.66	1.00389
6756.69	1.01027	6790.63	0.99117	6756.73	0.9999	6756.76	1.01546	6756.63	0.9919	6756.71	0.98346	6756.73	1.00383
6758.7	1.00476	6792.66	0.99054	6758.7	0.99883	6758.77	1.01451	6758.66	0.99178	6758.77	0.98254	6758.73	1.00303
6760.74	1.00224	6794.72	0.99026	6760.76	0.99895	6760.8	1.01134	6760.68	0.99247	6760.78	0.98451	6760.8	1.00322
6762.71	0.99991	6796.76	0.99	6762.76	1.00005	6762.78	1.00814	6762.67	0.993	6762.73	0.98566	6762.76	1.00396
6764.73	0.99905	6798.82	0.99004	6764.75	1.00045	6764.79	1.00429	6764.66	0.99294	6764.79	0.98672	6764.75	1.00438
6766.62	0.99965	6800.81	0.99022	6766.66	1.00051	6766.7	1.00037	6766.6	0.99267	6766.68	0.98762	6766.64	1.00447
6768.55	1.00142	6802.79	0.99067	6768.6	1.0006	6768.66	0.99682	6768.55	0.99265	6768.62	0.98863	6768.66	1.00509
6770.57	1.00281	6804.72	0.99158	6770.61	1.00075	6770.57	0.99371	6770.51	0.99311	6770.55	0.98962	6770.57	1.00494
6772.59	1.00225	6806.64	0.99214	6772.62	1.00062	6772.62	0.99139	6772.53	0.99431	6772.62	0.9907	6772.62	1.00495
6774.64	0.99903	6808.64	0.99317	6774.66	1.00043	6774.7	0.98951	6774.6	0.99611	6774.64	0.99178	6774.66	1.00477
6776.71	0.9936	6810.64	0.99416	6776.73	1.00032	6776.73	0.98778	6776.66	0.99816	6776.73	0.99295	6776.71	1.00453
6778.73	0.98729	6812.64	0.9953	6778.77	0.99994	6778.8	0.98644	6778.67	1.00009	6778.73	0.99405	6778.75	1.0044
6780.76	0.98191	6814.71	0.99645	6780.78	0.99946	6780.8	0.98558	6780.72	1.00183	6780.76	0.99509	6780.76	1.00412
6782.7	0.97832	6816.74	0.99769	6782.81	0.99897	6782.77	0.98544	6782.68	1.00324	6782.74	0.99606	6782.77	1.00386
6784.71	0.97638	6818.79	0.99873	6784.73	0.99836	6784.71	0.98593	6784.66	1.00427	6784.73	0.99703	6784.71	1.00348
6786.61	0.97571	6820.8	0.99972	6786.67	0.99795	6786.7	0.98709	6786.59	1.00499	6786.65	0.998	6786.67	1.00317
6788.6	0.97626	6822.77	1.00052	6788.62	0.99747	6788.62	0.98852	6788.53	1.0053	6788.6	0.99899	6788.62	1.00275
6790.59	0.97788	6824.69	1.00105	6790.63	0.99697	6790.63	0.99039	6790.52	1.00525	6790.63	1.00003	6790.59	1.00223
6792.62	0.98028	6826.64	1.00138	6792.66	0.99661	6792.62	0.9924	6792.51	1.00473	6792.64	1.00107	6792.62	1.00192
6794.68	0.983	6828.63	1.00164	6794.66	0.99623	6794.72	0.99439	6794.61	1.00407	6794.7	1.00201	6794.74	1.00174
6796.72	0.98634	6830.64	1.00139	6796.72	0.99604	6796.78	0.99602	6796.65	1.00322	6796.76	1.00283	6796.76	1.00138
6798.75	0.99029	6832.68	1.00147	6798.82	0.99604	6798.8	0.99744	6798.69	1.00252	6798.78	1.00362	6798.78	1.0012
6800.75	0.99458	6834.7	1.00095	6800.79	0.99603	6800.84	0.99874	6800.66	1.00193	6800.71	1.00426	6800.77	1.00111
6802.75	0.99875	6836.76	1.00113	6802.77	0.99609	6802.75	0.99995	6802.68	1.00175	6802.77	1.005	6802.75	1.00083
6804.72	1.00244	6838.76	1.00092	6804.72	0.99647	6804.72	1.00149	6804.64	1.00184	6804.72	1.00566	6804.72	1.00086
6806.61	1.00536	6841.77	1.00051	6806.61	0.99673	6806.66	1.00318	6806.55	1.00217	6806.66	1.00618	6806.64	1.00075
6808.62	1.00753	6844.67	1.00066	6808.64	0.99723	6808.66	1.00518	6808.53	1.00275	6808.62	1.00663	6808.64	1.0009
6810.62	1.00896	6847.59	1.00073	6810.62	0.99771	6810.64	1.00728	6810.53	1.00338	6810.6	1.00685	6810.64	1.00108
6812.62	1.00993	6850.63	1.00061	6812.64	0.99831	6812.62	1.0089	6812.56	1.00372	6812.69	1.0071	6812.69	1.0011
6814.67	1.01086	6853.65	0.99996	6814.71	0.99914	6814.71	1.01016	6814.6	1.00363	6814.71	1.00718	6814.71	1.0012
6816.72	1.0115	6856.72	0.99942	6816.68	0.99986	6816.74	1.01088	6816.68	1.00331	6816.7	1.0071	6816.72	1.00133
6818.73	1.01219	6859.73	0.99902	6818.73	1.00077	6818.79	1.01121	6818.66	1.00231	6818.75	1.0082	6818.7	1.00081
6820.73	1.01138	6862.71	0.99876	6820.73	1.00124	6820.76	1.01097	6820.67	1.00146	6820.76	1.00722	6820.78	1.00103
6822.72	1.00932	6865.61	0.99858	6822.74	1.00221	6822.77	1.01071	6822.57	1.00051	6822.68	1.00697	6822.77	1.001
6824.67	1.00586	6868.58	0.99829	6824.65	1.00285	6824.73	1.0103	6824.6	0.99993	6824.69	1.0068	6824.69	1.00104
6826.57	1.00131	6871.57	0.99793	6826.64	1.00372	6826.64	1.00959	6826.53	0.99938	6826.57	1.00642	6826.64	1.001
6828.58	0.99695	6874.68	0.99806	6828.58	1.00425	6828.63	1.00878	6828.5	0.99883	6828.6	1.00609	6828.6	1.00098
6830.53	0.99357	6877.72	0.99791	6830.62	1.00489	6830.64	1.00799	6830.51	0.99833	6830.62	1.00575	6830.62	1.00098
6832.61	0.99149	6880.7	0.99928	6832.64	1.00552	6832.66	1.00707	6832.55	0.998	6832.61	1.00521	6832.64	1.0009
6834.7	0.99076	6883.64	0.99703	6834.67	1.00624	6834.72	1.00625	6834.63	0.99778	6834.7	1.00478	6834.72	1.00089
6836.69	0.99094	6886.55	0.99817	6836.69	1.00677	6836.74	1.00537	6836.63	0.9976	6836.71	1.00416	6836.71	1.00073
6838.73	0.99141	6889.54	0.99879	6838.78	1.00746	6838.73	1.00445	6838.62	0.99768	6838.76	1.00363	6838.76	1.00068
6841.74	0.99272	6892.53	0.9991	6841.74	1.00811	6841.77	1.00335	6841.65	0.99809	6841.74	1.00262	6841.77	1.00058
6844.65	0.99395	6895.65	0.99945	6844.67	1.00867	6844.67	1.00246	6844.58	0.99857	6844.62	1.00167	6844.62	1.00046
6847.57	0.99443	6898.72	0.99994	6847.59	1.00894	6847.64	1.00227	6847.46	0.99901	6847.62	1.00088	6847.59	1.00042
6850.52	0.99354	6901.69	1.00046	6850.57	1.0088	6850.61	1.00233	6850.48	0.99947	6850.57	0.9999	6850.61	1.00044
6853.63	0.99192	6904.58	1.00118	6853.65	1.00841	6853.7	1.00252	6853.54	0.9996	6853.63	0.99903	6853.65	1.00026
6856.68	0.99036	6907.52	1.00191	6856.72	1.00748	6856.72	1.00234	6856.59	0.99953	6856.66	0.99815	6856.68	1.00003
6859.7	0.99025	6910.55	1.00268	6859.75	1.00629	6859.75	1.00179	6859.64	0.99931	6859.73	0.9974	6859.75	1.00007
6862.67	0.99183	6913.6	1.00337	6862.67	1.00471	6862.73	1.00103	6862.56	0.99889	6862.69	0.99681	6862.71	0.99987
6865.56	0.99415	6916.65	1.00393	6865.59	1.00301	6865.61	1.00034	6865.52	0.99862	6865.59	0.99612	6865.61	0.99974
6868.51	0.9964	6919.69	1.0044	6868.51	1.00118	6868.56	0.99992	6868.4	0.99816	6868.53	0.99557	6868.51	0.99949
6871.53	0.9989	6922.64	1.00481	6871.59	0.99962	6871.64	0.99996	6871.48	0.99802	6871.53	0.99506	6871.55	0.9995
6874.61	1.00204	6925.57	1.00508	6874.63	0.99815	6874.7	0.99998	6874.54	0.99792	6874.63	0.9948	6874.63	0.99955
6877.68	1.00548	6928.48	1.00534	6877.7	0.99717	6877.72	1.00008	6877.59	0.99807	6877.7	0.99441	6877.7	0.99981
6880.65	1.00836	6931.53	1.00576	6880.68	0.99697	6880.7	1.00086	6880.59	0.9989	6880.63	0.99437	6880.68	1.00083
6883.61	1.00963	6934.6	1.00626	6883.66	0.99491	6883.66	1.00022	6883.55	0.99871	6883.64	0.99401	6883.66	0.9988
6886.51	1.01088	6937.63	1.00682	6886.51	0.99502	6886.57	1.00089	6886.42	0.99948	6886.51	0.99438	6886.51	0.99945
6889.52	1.01153	6940.69	1.00758	6889.49	0.99507	6889.52	1.00168	6889.4	1.00022	6889.49	0.99455	6889.49	0.99972
6892.51	1.011	6943.59	1.00868	6892.53	0.99506	6892.55	1.00253	6892.44	1.00081	6892.53	0.99472	6892.53	0.99969
6895.59	1.00945	6946.53	1.00925	6895.63	0.99522	6895.61	1.00312	6895.54	1.00127	6895.65	0.9951	6895.61	0.99984
6898.65	1.00611	6949.48	1.00911	6898.65	0.99529	6898.69	1.00349	6898.56	1.00159	6898.65	0.99547	6898.63	0.99975
6901.62	1.00143	6952.53	1.00973	6901.65	0.99552	6901.67	1.0034	6901.56	1.00187	6901.62	0.9959	6901.69	0.99985
6904.54	0.99764	6955.6	1.01014	6904.54	0.99572	6904.6	1.00301	6904.47	1.00184	6904.56	0.99645	6904.56	0.99957
6907.49	0.99542	6958.67	1.01044	6907.49	0.99601	6907.49	1.00204	6907.43	1.00167	6907.49	0.99705	6907.49	0.99956
6910.48	0.99465	6961.63	1.01061	6910.5	0.99652	6910.52	1.00062	6910.39	1.00127	6910.52	0.99771	6910.48	0.99934
6913.53	0.99534	6964.57	1.01073	6913.53	0.99715	6913.58	0.99889	6913.46	1.00071	6913.55	0.99848	6913.55	0.9992
6916.59	0.99713	6967.49	1.01091	6916.61	0.99766	6916.63	0.99713	6916.5	1.00006	6916.61	0.9992	6916.61	0.99889
6919.65	0.99924	6970.44	1.01096	6919.65	0.99827	6919.69	0.99594	6919.53	0.99947	6919.65	1.00006	6919.65	0.99873
6922.6	1.00069	6973.53	1.01118	6922.62	0.99876	6922.62	0.99499	6922.53	0.99909	6922.6	1.00092	6922.62	0.99842
6925.48	1.00119	6976.59	1.01127	6925.5	0.99917	6925.5	0.99426	6925.44	0.99881	6925.48	1.00182	6925.5	0.99811
6928.48	1.00102	6979.64	1.01137	6928.46	0.99961	6928.48	0.99367	6928.34	0.9986	6928.48	1.00285	6928.46	0.99789
6931.46	1.00081	6982.64	1.01165	6931.48	0.99989	6931.53	0.99323	6931.39	0.99852	6931.48	1.00385	6931.48	0.99759
6934.55	1.00097	6985.6	1.01209	6934.55	1.00016	6934.58	0.99302	6934.42	0.99854	6934.55	1.00489	6934.55	0.99735
6937.59	1.00134	6988.52	1.01259	6937.61	1.00028	6937.63	0.99314	6937.49	0.99847	6937.61	1.00594	6937.61	0.99718
6940.62	1.00173	6991.53	1.01331	6940.64	1.00047	6940.66	0.99372	6940.53	0.99841	6940.64	1.00712	6940.64	0.99701
6943.59	1.00187	6994.56	1.01382	6943.56	1.00065	6943.59	0.99451	6943.47	0.99848	6943.56	1.00793	6943.61	0.99718
6946.44	1.00283	6997.63	1.0145	6946.49	1.00071	6946.49	0.99521	6946.4	0.99834	6946.49	1.0094	6946.49	0.99685
6949.44	1.00341	7000.69	1.01524	6949.42	1.00045	6949.46	0.99593	6949.35	0.99813	6949.44	1.01138	6949.44	0.99607
6952.48	1.00405	7003.74	1.01594	6952.51	1.00038	6952.48	0.9962	6952.39	0.99825	6952.48	1.01147	6952.48	0.99624
6955.55	1.00499	7006.58	1.01665	6955.55	1.00059	6955.57	0.99668	6955.42	0.99831	6955.55	1.01269	6955.55	0.9962
6958.6	1.00566	7009.54	1.01743	6958.6	1.00068	6958.6	0.99688	6958.47	0.99838	6958.62	1.01388	6958.6	0.99603
6961.56	1.00666	7012.54	1.01812	6961.59	1.00067	6961.59	0.99698	6961.52	0.99854	6961.56	1.01497	6961.59	0.99584
6964.55	1.0084	7015.57	1.01895	6964.55	1.00079	6964.57	0.99701	6964.44	0.99867	6964.55	1.01598	6964.55	0.99585
6967.43	1.01052	7018.66	1.01959	6967.45	1.00092	6967.45	0.99697	6967.36	0.99879	6967.45	1.01696	6967.45	0.99565
6970.42	1.01248	7021.72	1.0202	6970.4	1.00086	6970.44	0.99692	6970.33	0.99885	6970.42	1.01789	6970.42	0.99541
6973.46	1.01378	7024.71	1.02088	6973.5	1.0009	6973.48	0.99676	6973.39	0.99889	6973.48	1.01884	6973.46	0.99521
6976.59	1.01441	7027.62	1.02145	6976.55	1.00072	6976.57	0.99666	6976.43	0.99897	6976.55	1.01975	6976.55	0.99502
6979.59	1.01431	7030.55	1.0221	6979.62	1.00048	6979.62	0.99652	6979.52	0.99923	6979.62	1.0205	6979.62	0.99474
6982.57	1.01413	7033.55	1.02269	6982.6	1.00007	6982.62	0.99636	6982.5	0.99927	6982.6	1.02136	6982.6	0.99454
6985.56	1.0142	7036.58	1.02317	6985.56	0.99968	6985.56	0.99621	6985.46	0.99941	6985.56	1.02222	6985.56	0.99434
6988.45	1.0142	7039.7	1.02385	6988.47	0.99931	6988.47	0.99605	6988.36	0.99952	6988.47	1.02291	6988.47	0.99406
6991.46	1.01411	7042.71	1.02432	6991.46	0.99886	6991.51	0.99588	6991.35	0.99948	6991.46	1.02362	6991.46	0.99385
6994.52	1.01428	7045.72	1.02502	6994.5	0.99848	6994.54	0.9957	6994.43	0.99952	6994.52	1.02433	6994.52	0.99356
6997.6	1.01421	7048.65	1.02544	6997.6	0.99799	6997.65	0.99539	6997.49	0.99946	6997.6	1.02498	6997.58	0.99329
7000.65	1.01394	7051.55	1.02618	7000.65	0.99749	7000.69	0.99491	7000.53	0.99943	7000.67	1.02558	7000.65	0.99308
7003.65	1.01376	7054.55	1.02684	7003.65	0.99702	7003.67	0.99422	7003.55	0.99946	7003.65	1.02624	7003.65	0.99277
7006.58	1.01364	7057.59	1.02753	7006.58	0.99664	7006.6	0.99339	7006.51	0.99934	7006.58	1.0268	7006.58	0.99253
7009.51	1.01342	7060.69	1.02826	7009.51	0.99621	7009.51	0.99244	7009.4	0.99914	7009.51	1.0273	7009.49	0.99226
7012.52	1.01342	7063.74	1.02894	7012.52	0.99578	7012.54	0.99153	7012.38	0.99894	7012.52	1.02789	7012.5	0.99183
7015.53	1.01353	7066.73	1.0296	7015.53	0.99531	7015.55	0.9906	7015.46	0.99877	7015.53	1.0284	7015.53	0.9915
7018.61	1.01412	7069.62	1.03017	7018.63	0.99502	7018.66	0.98979	7018.52	0.99868	7018.63	1.02899	7018.61	0.99115
7021.67	1.01443	7072.59	1.03091	7021.67	0.99471	7021.69	0.989	7021.56	0.99855	7021.67	1.02943	7021.67	0.99084
7024.69	1.0145	7075.6	1.03139	7024.67	0.99442	7024.67	0.98817	7024.55	0.9984	7024.67	1.02995	7024.67	0.99052
7027.59	1.01439	7078.62	1.03188	7027.62	0.9941	7027.62	0.98743	7027.5	0.99833	7027.59	1.03039	7027.62	0.99014
7030.5	1.01452	7081.67	1.03279	7030.5	0.99372	7030.55	0.9867	7030.41	0.99815	7030.5	1.03089	7030.52	0.98976
7033.48	1.01475	7084.74	1.03337	7033.52	0.99351	7033.52	0.98604	7033.41	0.99798	7033.5	1.03145	7033.52	0.98947
7036.53	1.01513	7087.74	1.03411	7036.55	0.99312	7036.58	0.98543	7036.41	0.99774	7036.55	1.03197	7036.53	0.98902
7039.65	1.01581	7090.65	1.03481	7039.68	0.9929	7039.68	0.98494	7039.56	0.99766	7039.65	1.0326	7039.65	0.98865
7042.64	1.01665	7093.57	1.03548	7042.71	0.99258	7042.71	0.98457	7042.57	0.99751	7042.69	1.0332	7042.69	0.98826
7045.68	1.01797	7096.58	1.03622	7045.68	0.99237	7045.68	0.98422	7045.58	0.99746	7045.68	1.03374	7045.65	0.98782
7048.6	1.01965	7099.59	1.03694	7048.6	0.99185	7048.6	0.98394	7048.48	0.99727	7048.6	1.03429	7048.6	0.9873
7051.52	1.0216	7102.7	1.03772	7051.52	0.99172	7051.55	0.9837	7051.41	0.99727	7051.52	1.03491	7051.5	0.98697
7054.52	1.02343	7105.72	1.03846	7054.52	0.99146	7054.55	0.98351	7054.43	0.99725	7054.52	1.0355	7054.52	0.98656
7057.55	1.02475	7108.7	1.03929	7057.57	0.99115	7057.55	0.98328	7057.45	0.99714	7057.55	1.03614	7057.55	0.9861
7060.64	1.02575	7111.68	1.04081	7060.64	0.99079	7060.67	0.98305	7060.55	0.99706	7060.64	1.03692	7060.64	0.98572
7063.65	1.02627	7114.58	1.04271	7063.69	0.9905	7063.72	0.98275	7063.6	0.99704	7063.67	1.03761	7063.69	0.98535
7066.68	1.02639	7117.54	1.04366	7066.7	0.99021	7066.73	0.98239	7066.59	0.99699	7066.68	1.0384	7066.7	0.98489
7069.62	1.02625	7120.6	1.04514	7069.62	0.98995	7069.62	0.98221	7069.53	0.9969	7069.62	1.03923	7069.62	0.98443
7072.52	1.02613	7123.66	1.04677	7072.54	0.9897	7072.59	0.98194	7072.4	0.99666	7072.54	1.04004	7072.54	0.98386
7075.53	1.02593	7126.72	1.04852	7075.56	0.9893	7075.56	0.98147	7075.44	0.99657	7075.53	1.04061	7075.53	0.98325
7078.55	1.02642	7129.71	1.05013	7078.57	0.98879	7078.6	0.98106	7078.46	0.99644	7078.55	1.04159	7078.53	0.98272
7081.64	1.02714	7132.71	1.05173	7081.67	0.98861	7081.69	0.98068	7081.53	0.99636	7081.67	1.04258	7081.64	0.98236
7084.69	1.02795	7135.61	1.05203	7084.72	0.98854	7084.72	0.9801	7084.57	0.99624	7084.69	1.04349	7084.67	0.98184
7087.69	1.02874	7138.44	1.05268	7087.69	0.98834	7087.72	0.97937	7087.58	0.99612	7087.69	1.04453	7087.65	0.98137
7090.65	1.02932	7142.5	1.05384	7090.65	0.98823	7090.68	0.97876	7090.53	0.996	7090.65	1.04562	7090.65	0.98094
7093.52	1.02954	7146.69	1.055	7093.54	0.9881	7093.57	0.97814	7093.4	0.9959	7093.52	1.04664	7093.52	0.98047
7096.53	1.02972	7150.73	1.05601	7096.53	0.98801	7096.56	0.97735	7096.44	0.99595	7096.53	1.04775	7096.48	0.97993
7099.52	1.02976	7154.64	1.05693	7099.57	0.98787	7099.57	0.97664	7099.47	0.99587	7099.52	1.04878	7099.57	0.97961
7102.63	1.03023	7158.55	1.05791	7102.63	0.9878	7102.66	0.97594	7102.54	0.99587	7102.66	1.05024	7102.63	0.97919
7105.7	1.03037	7162.47	1.05897	7105.7	0.98731	7105.68	0.97492	7105.58	0.99588	7105.68	1.05118	7105.7	0.97856
7108.63	1.03094	7166.63	1.06054	7108.7	0.98723	7108.67	0.97414	7108.56	0.99605	7108.67	1.05236	7108.7	0.97812
7111.65	1.0319	7170.72	1.06079	7111.65	0.98723	7111.68	0.9735	7111.53	0.99728	7111.65	1.05379	7111.65	0.97795
7114.51	1.03284	7174.7	1.06238	7114.53	0.98716	7114.56	0.97298	7114.44	1.00089	7114.53	1.05516	7114.53	0.978
7117.49	1.03383	7178.61	1.06334	7117.49	0.98678	7117.52	0.97216	7117.4	1.00499	7117.49	1.05625	7117.49	0.97752
7120.55	1.03569	7182.52	1.06442	7120.57	0.98676	7120.5	0.97152	7120.48	1.01401	7120.55	1.05775	7120.55	0.97784
7123.61	1.03809	7186.56	1.06556	7123.59	0.98661	7123.59	0.97099	7123.51	1.02181	7123.59	1.05915	7123.51	0.97902
7126.65	1.0412	7190.61	1.06673	7126.69	0.98669	7126.57	0.97052	7126.57	1.02671	7126.67	1.06075	7126.69	0.98151
7129.66	1.04263	7194.71	1.06801	7129.54	0.9866	7129.69	0.97034	7129.54	1.02965	7129.69	1.06239	7129.66	0.98398
7132.61	1.04155	7198.69	1.06909	7132.66	0.98691	7132.66	0.97013	7132.54	1.03074	7132.63	1.06398	7132.63	0.98472
7135.42	1.04182	7202.6	1.07016	7135.56	0.98614	7135.56	0.96956	7135.42	1.02964	7135.56	1.06534	7135.56	0.98413
7138.42	1.04277	7206.56	1.07115	7138.44	0.98524	7138.49	0.96897	7138.39	1.02896	7138.47	1.06662	7138.44	0.9832
7142.55	1.04452	7210.68	1.07224	7142.52	0.98438	7142.57	0.9681	7142.38	1.02821	7142.5	1.06891	7142.57	0.98113
7146.61	1.04543	7214.71	1.07353	7146.64	0.98364	7146.66	0.96718	7146.54	1.02698	7146.64	1.07101	7146.64	0.97924
7150.64	1.04669	7218.73	1.07485	7150.73	0.98362	7150.73	0.96617	7150.61	1.02614	7150.66	1.07265	7150.71	0.97833
7154.64	1.04829	7222.55	1.07595	7154.64	0.98281	7154.62	0.96528	7154.54	1.02558	7154.64	1.07448	7154.64	0.97717
7158.48	1.04977	7226.53	1.07703	7158.5	0.98181	7158.53	0.96448	7158.36	1.02535	7158.5	1.07646	7158.5	0.97582
7162.51	1.0509	7230.6	1.07825	7162.51	0.98108	7162.49	0.96372	7162.42	1.02556	7162.51	1.07873	7162.51	0.97496
7166.51	1.05232	7234.62	1.07935	7166.53	0.98071	7166.56	0.96313	7166.48	1.02604	7166.6	1.08108	7166.6	0.97483
7170.62	1.05304	7238.7	1.08068	7170.6	0.9795	7170.6	0.9619	7170.53	1.02574	7170.65	1.0827	7170.62	0.97373
7174.63	1.05405	7242.66	1.08193	7174.6	0.97943	7174.6	0.96112	7174.51	1.02598	7174.6	1.08467	7174.68	0.97423
7178.54	1.05446	7246.57	1.0833	7178.56	0.97878	7178.54	0.96021	7178.39	1.02587	7178.49	1.08647	7178.46	0.97349
7182.43	1.05483	7250.49	1.08457	7182.43	0.97773	7182.5	0.9592	7182.35	1.02572	7182.47	1.08821	7182.38	0.97248
7186.49	1.05552	7254.58	1.08602	7186.51	0.97656	7186.54	0.95793	7186.37	1.0254	7186.47	1.08989	7186.54	0.97148
7190.58	1.05634	7258.68	1.08742	7190.58	0.97567	7190.63	0.95662	7190.58	1.02493	7190.56	1.09164	7190.66	0.97035
7194.68	1.05745	7262.69	1.08913	7194.66	0.97482	7194.61	0.95523	7194.53	1.02428	7194.68	1.09341	7194.63	0.96904
7198.61	1.05848	7266.55	1.09312	7198.64	0.97401	7198.66	0.95405	7198.54	1.02358	7198.61	1.09508	7198.61	0.96795
7202.43	1.05936	7270.39	1.0901	7202.5	0.97315	7202.5	0.95282	7202.4	1.02313	7202.52	1.09681	7202.48	0.96674
7206.47	1.05994	7274.43	1.09247	7206.49	0.97209	7206.54	0.9515	7206.44	1.0231	7206.52	1.09846	7206.52	0.96552
7210.56	1.06059	7278.58	1.09392	7210.61	0.97121	7210.66	0.95011	7210.51	1.02321	7210.63	1.1002	7210.53	0.96407
7214.63	1.06161	7282.61	1.09535	7214.66	0.97032	7214.68	0.94873	7214.51	1.02316	7214.68	1.10186	7214.66	0.96283
7218.66	1.06268	7286.54	1.09682	7218.69	0.96943	7218.71	0.94737	7218.59	1.02315	7218.64	1.10344	7218.64	0.96145
7222.57	1.06344	7290.4	1.0981	7222.57	0.96841	7222.52	0.94605	7222.47	1.02281	7222.57	1.10511	7222.47	0.96022
7226.41	1.06401	7294.44	1.09947	7226.48	0.96748	7226.53	0.94473	7226.36	1.02213	7226.46	1.10675	7226.48	0.95916
7230.55	1.06474	7298.52	1.10091	7230.48	0.96649	7230.48	0.94328	7230.43	1.02131	7230.55	1.10849	7230.55	0.95801
7234.6	1.06572	7302.52	1.10207	7234.65	0.96572	7234.67	0.94193	7234.55	1.0205	7234.62	1.11011	7234.65	0.95678
7238.68	1.06697	7306.6	1.10357	7238.68	0.96476	7238.7	0.94058	7238.53	1.01993	7238.7	1.11191	7238.68	0.9555
7242.61	1.06807	7310.51	1.10489	7242.61	0.96372	7242.66	0.93921	7242.48	1.01977	7242.61	1.1135	7242.56	0.9542
7246.5	1.06917	7314.39	1.10626	7246.47	0.96279	7246.52	0.93791	7246.4	1.01974	7246.5	1.11511	7246.5	0.95322
7250.49	1.07034	7318.41	1.10768	7250.49	0.96197	7250.51	0.93655	7250.39	1.01954	7250.44	1.11678	7250.49	0.95191
7254.56	1.0719	7322.51	1.10922	7254.56	0.96122	7254.61	0.93519	7254.46	1.01926	7254.53	1.1186	7254.53	0.95068
7258.56	1.07349	7326.57	1.11073	7258.66	0.96031	7258.68	0.93403	7258.46	1.01896	7258.61	1.12041	7258.61	0.94956
7262.59	1.0752	7330.57	1.11221	7262.64	0.95983	7262.59	0.93306	7262.49	1.0191	7262.64	1.1222	7262.59	0.94875
7266.5	1.07861	7334.43	1.11363	7266.45	0.96003	7266.45	0.9339	7266.4	1.0195	7266.45	1.12467	7266.5	0.94924
7270.39	1.0769	7338.35	1.11508	7270.41	0.95573	7270.44	0.92976	7270.31	1.01753	7270.44	1.12483	7270.39	0.94451
7274.38	1.07842			7274.48	0.9556	7274.51	0.92892	7274.38	1.01736	7274.41	1.12726	7274.48	0.94388
7278.56	1.07934			7278.56	0.95454	7278.51	0.92773	7278.45	1.01684	7278.6	1.12943	7278.56	0.94247
7282.63	1.08027			7282.63	0.95342	7282.61	0.92631	7282.46	1.01637	7282.61	1.13138	7282.58	0.94099
7286.57	1.08113			7286.59	0.9523	7286.59	0.92502	7286.47	1.01603	7286.57	1.1334	7286.54	0.93961
7290.4	1.08218			7290.4	0.95112	7290.43	0.92374	7290.33	1.01572	7290.4	1.13541	7290.35	0.9381
7294.39	1.08339			7294.42	0.94995	7294.44	0.92239	7294.24	1.01515	7294.39	1.13744	7294.32	0.93669
7298.44	1.08467			7298.44	0.94874	7298.44	0.92091	7298.31	1.0146	7298.44	1.13951	7298.41	0.93523
7302.52	1.08588			7302.54	0.94751	7302.52	0.91937	7302.42	1.014	7302.47	1.14157	7302.52	0.93372
7306.47	1.08696			7306.55	0.94623	7306.57	0.91789	7306.47	1.01344	7306.57	1.14382	7306.47	0.93209
7310.51	1.08802			7310.51	0.94513	7310.46	0.91637	7310.38	1.01297	7310.51	1.14599	7310.51	0.93062
7314.39	1.08903			7314.39	0.94398	7314.39	0.91484	7314.27	1.01254	7314.32	1.14796	7314.39	0.92915
7318.36	1.09023			7318.36	0.94271	7318.41	0.91326	7318.26	1.01184	7318.34	1.15025	7318.36	0.92751
7322.36	1.09136			7322.41	0.94136	7322.41	0.9116	7322.36	1.01124	7322.46	1.15262	7322.39	0.92579
7326.57	1.09263			7326.52	0.94009	7326.57	0.90996	7326.44	1.0107	7326.52	1.15491	7326.52	0.92449
7330.52	1.09369			7330.55	0.93885	7330.55	0.90836	7330.4	1.01015	7330.52	1.15719	7330.52	0.92284
7334.41	1.09469			7334.41	0.93758	7334.43	0.90673	7334.31	1.0096	7334.33	1.15931	7334.41	0.92118
7338.25	1.09566			7338.27	0.93627	7338.35	0.9051	7338.27	1.00914	7338.35	1.16168	7338.3	0.91951

## Sheet: Fig. 3d
Mn foil		Mn@CDs		MnS		KMnO4		Mn-PC		Mn2O3		MnO
R (Å)	FT (k3χ(k))	R (Å)	FT (k3χ(k))	R (Å)	FT (k3χ(k))	R (Å)	FT (k3χ(k))	R (Å)	FT (k3χ(k))	R (Å)	FT (k3χ(k))	R (Å)	FT (k3χ(k))
0	0.293	0	0.42337	0	0.09713	0	0.22293	0	1.53135	0	0.23791	0	1.02211
0.03068	0.29144	0.03068	0.41593	0.03068	0.09612	0.03068	0.38095	0.03068	1.49512	0.03068	0.23187	0.03068	1.00123
0.06136	0.287	0.06136	0.39392	0.06136	0.09319	0.06136	0.64021	0.06136	1.38846	0.06136	0.21485	0.06136	0.93933
0.09204	0.28039	0.09204	0.35823	0.09204	0.08868	0.09204	0.88537	0.09204	1.21769	0.09204	0.19047	0.09204	0.83873
0.12272	0.27278	0.12272	0.31049	0.12272	0.08321	0.12272	1.08693	0.12272	0.9943	0.12272	0.16592	0.12272	0.70326
0.1534	0.26565	0.1534	0.25337	0.1534	0.07778	0.1534	1.22872	0.1534	0.73851	0.1534	0.15273	0.1534	0.53849
0.18408	0.26065	0.18408	0.19173	0.18408	0.0738	0.18408	1.29987	0.18408	0.49613	0.18408	0.16167	0.18408	0.35285
0.21476	0.25922	0.21476	0.13677	0.21476	0.07285	0.21476	1.29388	0.21476	0.39907	0.21476	0.19167	0.21476	0.16814
0.24544	0.26221	0.24544	0.11639	0.24544	0.07604	0.24544	1.20865	0.24544	0.56109	0.24544	0.23218	0.24544	0.14796
0.27612	0.26958	0.27612	0.15213	0.27612	0.08331	0.27612	1.04681	0.27612	0.83529	0.27612	0.27311	0.27612	0.33604
0.3068	0.28035	0.3068	0.21756	0.3068	0.09352	0.3068	0.81672	0.3068	1.1174	0.3068	0.30756	0.3068	0.54222
0.33748	0.29292	0.33748	0.28944	0.33748	0.10508	0.33748	0.53686	0.33748	1.36865	0.33748	0.33117	0.33748	0.73695
0.36816	0.3054	0.36816	0.358	0.36816	0.11643	0.36816	0.27572	0.36816	1.56793	0.36816	0.34156	0.36816	0.90881
0.39884	0.31596	0.39884	0.4179	0.39884	0.12626	0.39884	0.35213	0.39884	1.70073	0.39884	0.33841	0.39884	1.04905
0.42951	0.32304	0.42951	0.46537	0.42951	0.13354	0.42951	0.69202	0.42951	1.75677	0.42951	0.32386	0.42951	1.15022
0.46019	0.3255	0.46019	0.49748	0.46019	0.13758	0.46019	1.06016	0.46019	1.72961	0.46019	0.30332	0.46019	1.20614
0.49087	0.32275	0.49087	0.51194	0.49087	0.13808	0.49087	1.40485	0.49087	1.61662	0.49087	0.28629	0.49087	1.21201
0.52155	0.31494	0.52155	0.50723	0.52155	0.13528	0.52155	1.6977	0.52155	1.41914	0.52155	0.28518	0.52155	1.16464
0.55223	0.30314	0.55223	0.48268	0.55223	0.13016	0.55223	1.9149	0.55223	1.14279	0.55223	0.30889	0.55223	1.06262
0.58291	0.28964	0.58291	0.43883	0.58291	0.12468	0.58291	2.03532	0.58291	0.79873	0.58291	0.35588	0.58291	0.90662
0.61359	0.27822	0.61359	0.37813	0.61359	0.12183	0.61359	2.04075	0.61359	0.41412	0.61359	0.41644	0.61359	0.69978
0.64427	0.274	0.64427	0.307	0.64427	0.12499	0.64427	1.91658	0.64427	0.23333	0.64427	0.4794	0.64427	0.44996
0.67495	0.28221	0.67495	0.24198	0.67495	0.13625	0.67495	1.65253	0.67495	0.62828	0.67495	0.53534	0.67495	0.19301
0.70563	0.3059	0.70563	0.22117	0.70563	0.15508	0.70563	1.244	0.70563	1.11283	0.70563	0.5773	0.70563	0.26056
0.73631	0.34444	0.73631	0.27847	0.73631	0.17892	0.73631	0.69786	0.73631	1.59872	0.73631	0.60134	0.73631	0.59499
0.76699	0.39438	0.76699	0.39268	0.76699	0.20452	0.76699	0.22348	0.76699	2.05912	0.76699	0.60779	0.76699	0.9647
0.79767	0.45116	0.79767	0.53352	0.79767	0.22877	0.79767	0.91329	0.79767	2.47288	0.79767	0.60385	0.79767	1.34164
0.82835	0.5103	0.82835	0.68524	0.82835	0.24888	0.82835	1.86381	0.82835	2.82127	0.82835	0.60716	0.82835	1.7107
0.85903	0.56768	0.85903	0.83905	0.85903	0.26249	0.85903	2.92654	0.85903	3.08795	0.85903	0.64653	0.85903	2.05832
0.88971	0.6196	0.88971	0.98879	0.88971	0.26773	0.88971	4.07209	0.88971	3.25955	0.88971	0.7511	0.88971	2.37149
0.92039	0.66272	0.92039	1.12957	0.92039	0.26338	0.92039	5.27285	0.92039	3.32638	0.92039	0.93302	0.92039	2.63792
0.95107	0.69407	0.95107	1.25752	0.95107	0.24924	0.95107	6.4995	0.95107	3.28313	0.95107	1.18628	0.95107	2.84641
0.98175	0.71103	0.98175	1.36972	0.98175	0.22686	0.98175	7.72122	0.98175	3.12988	0.98175	1.49786	0.98175	2.9873
1.01243	0.71138	1.01243	1.46443	1.01243	0.20114	1.01243	8.90656	1.01243	2.87361	1.01243	1.85442	1.01243	3.05294
1.04311	0.69339	1.04311	1.5412	1.04311	0.18314	1.04311	10.0243	1.04311	2.53132	1.04311	2.2435	1.04311	3.03821
1.07379	0.65582	1.07379	1.60114	1.07379	0.19012	1.07379	11.0447	1.07379	2.1374	1.07379	2.65319	1.07379	2.94118
1.10447	0.59806	1.10447	1.647	1.10447	0.2323	1.10447	11.9399	1.10447	1.76178	1.10447	3.07178	1.10447	2.76392
1.13515	0.52015	1.13515	1.68325	1.13515	0.30337	1.13515	12.6856	1.13515	1.54036	1.13515	3.48766	1.13515	2.51398
1.16583	0.42292	1.16583	1.71585	1.16583	0.39196	1.16583	13.2612	1.16583	1.63748	1.16583	3.88949	1.16583	2.20731
1.19651	0.30841	1.19651	1.7518	1.19651	0.48918	1.19651	13.6507	1.19651	2.05891	1.19651	4.26637	1.19651	1.87486
1.22718	0.18185	1.22718	1.7982	1.22718	0.58825	1.22718	13.8436	1.22718	2.66911	1.22718	4.60816	1.22718	1.57684
1.25786	0.0795	1.25786	1.86107	1.25786	0.68336	1.25786	13.8347	1.25786	3.3562	1.25786	4.90574	1.25786	1.41966
1.28854	0.16329	1.28854	1.94411	1.28854	0.76917	1.28854	13.6243	1.28854	4.05396	1.28854	5.15132	1.28854	1.51499
1.31922	0.32012	1.31922	2.04794	1.31922	0.84074	1.31922	13.2188	1.31922	4.71983	1.31922	5.33866	1.31922	1.85924
1.3499	0.48706	1.3499	2.16996	1.3499	0.8936	1.3499	12.6298	1.3499	5.32281	1.3499	5.46328	1.3499	2.35555
1.38058	0.65453	1.38058	2.30497	1.38058	0.9241	1.38058	11.8741	1.38058	5.83872	1.38058	5.52258	1.38058	2.91962
1.41126	0.81672	1.41126	2.44607	1.41126	0.92986	1.41126	10.9732	1.41126	6.2486	1.41126	5.51588	1.41126	3.49855
1.44194	0.96835	1.44194	2.58555	1.44194	0.91053	1.44194	9.95245	1.44194	6.53822	1.44194	5.44446	1.44194	4.05754
1.47262	1.10435	1.47262	2.71569	1.47262	0.86922	1.47262	8.84069	1.47262	6.69798	1.47262	5.31141	1.47262	4.5711
1.5033	1.21988	1.5033	2.82927	1.5033	0.81493	1.5033	7.66922	1.5033	6.72296	1.5033	5.12151	1.5033	5.01927
1.53398	1.31041	1.53398	2.91991	1.53398	0.76645	1.53398	6.47146	1.53398	6.61296	1.53398	4.88103	1.53398	5.38619
1.56466	1.37187	1.56466	2.98235	1.56466	0.75531	1.56466	5.28279	1.56466	6.37237	1.56466	4.5974	1.56466	5.65966
1.59534	1.4008	1.59534	3.01256	1.59534	0.81752	1.59534	4.14152	1.59534	6.01006	1.59534	4.27897	1.59534	5.83109
1.62602	1.39448	1.62602	3.00781	1.62602	0.97084	1.62602	3.09297	1.62602	5.53913	1.62602	3.93464	1.62602	5.89556
1.6567	1.35114	1.6567	2.96674	1.6567	1.20666	1.6567	2.20197	1.6567	4.97662	1.6567	3.57355	1.6567	5.85189
1.68738	1.27009	1.68738	2.88931	1.68738	1.50562	1.68738	1.58273	1.68738	4.34331	1.68738	3.20475	1.68738	5.70263
1.71806	1.15212	1.71806	2.77674	1.71806	1.84976	1.71806	1.38841	1.71806	3.6638	1.71806	2.8369	1.71806	5.45396
1.74874	1.00009	1.74874	2.63145	1.74874	2.22454	1.74874	1.57331	1.74874	2.96749	1.74874	2.47802	1.74874	5.11547
1.77942	0.8206	1.77942	2.4569	1.77942	2.61767	1.77942	1.8835	1.77942	2.29208	1.77942	2.13538	1.77942	4.69986
1.8101	0.62924	1.8101	2.25743	1.8101	3.01811	1.8101	2.15529	1.8101	1.6942	1.8101	1.81531	1.8101	4.22243
1.84078	0.46905	1.84078	2.03808	1.84078	3.41546	1.84078	2.32605	1.84078	1.27377	1.84078	1.52323	1.84078	3.70055
1.87146	0.44303	1.87146	1.80436	1.87146	3.79982	1.87146	2.37579	1.87146	1.16448	1.87146	1.26369	1.87146	3.15298
1.90214	0.60759	1.90214	1.56203	1.90214	4.16176	1.90214	2.30266	1.90214	1.35176	1.90214	1.04042	1.90214	2.59923
1.93282	0.87864	1.93282	1.31688	1.93282	4.49243	1.93282	2.11423	1.93282	1.65612	1.93282	0.85624	1.93282	2.05906
1.9635	1.19294	1.9635	1.07445	1.9635	4.78372	1.9635	1.8239	1.9635	1.95008	1.9635	0.71278	1.9635	1.55307
1.99418	1.52403	1.99418	0.83983	1.99418	5.02845	1.99418	1.44891	1.99418	2.17767	1.99418	0.60978	1.99418	1.10674
2.02485	1.85778	2.02485	0.61746	2.02485	5.22052	2.02485	1.00912	2.02485	2.31598	2.02485	0.54452	2.02485	0.7673
2.05553	2.18414	2.05553	0.41098	2.05553	5.35509	2.05553	0.5264	2.05553	2.35776	2.05553	0.51291	2.05553	0.63717
2.08621	2.49476	2.08621	0.22333	2.08621	5.4287	2.08621	0.05962	2.08621	2.30578	2.08621	0.51266	2.08621	0.77849
2.11689	2.78232	2.11689	0.06104	2.11689	5.43934	2.11689	0.49427	2.11689	2.1714	2.11689	0.54635	2.11689	1.08519
2.14757	3.04036	2.14757	0.10304	2.14757	5.38653	2.14757	0.9814	2.14757	1.97573	2.14757	0.62091	2.14757	1.48051
2.17825	3.26326	2.17825	0.231	2.17825	5.27131	2.17825	1.43263	2.17825	1.75334	2.17825	0.74345	2.17825	1.95248
2.20893	3.44638	2.20893	0.34449	2.20893	5.09622	2.20893	1.83141	2.20893	1.55842	2.20893	0.91769	2.20893	2.50755
2.23961	3.58604	2.23961	0.44447	2.23961	4.86521	2.23961	2.16481	2.23961	1.4648	2.23961	1.14364	2.23961	3.15136
2.27029	3.67972	2.27029	0.53371	2.27029	4.58353	2.27029	2.42331	2.27029	1.53391	2.27029	1.41881	2.27029	3.88322
2.30097	3.72601	2.30097	0.61498	2.30097	4.25757	2.30097	2.60089	2.30097	1.76293	2.30097	1.73911	2.30097	4.69538
2.33165	3.72471	2.33165	0.69044	2.33165	3.8947	2.33165	2.69516	2.33165	2.09512	2.33165	2.0992	2.33165	5.57393
2.36233	3.67681	2.36233	0.76124	2.36233	3.50312	2.36233	2.70727	2.36233	2.47	2.36233	2.49252	2.36233	6.50017
2.39301	3.58449	2.39301	0.82734	2.39301	3.09165	2.39301	2.64182	2.39301	2.84318	2.39301	2.91132	2.39301	7.45191
2.42369	3.45104	2.42369	0.88758	2.42369	2.66965	2.42369	2.50666	2.42369	3.1843	2.42369	3.34673	2.42369	8.40467
2.45437	3.28077	2.45437	0.93994	2.45437	2.24708	2.45437	2.31267	2.45437	3.47256	2.45437	3.78889	2.45437	9.33285
2.48505	3.07895	2.48505	0.98192	2.48505	1.83487	2.48505	2.0736	2.48505	3.69396	2.48505	4.22723	2.48505	10.2107
2.51573	2.85166	2.51573	1.01084	2.51573	1.44611	2.51573	1.80621	2.51573	3.83992	2.51573	4.65074	2.51573	11.0132
2.54641	2.60565	2.54641	1.02426	2.54641	1.09933	2.54641	1.5308	2.54641	3.90662	2.54641	5.0483	2.54641	11.7172
2.57709	2.34819	2.57709	1.02024	2.57709	0.82637	2.57709	1.27249	2.57709	3.89464	2.57709	5.40909	2.57709	12.3021
2.60777	2.08693	2.60777	0.99754	2.60777	0.68046	2.60777	1.06255	2.60777	3.80877	2.60777	5.72293	2.60777	12.7505
2.63845	1.82975	2.63845	0.95582	2.63845	0.69912	2.63845	0.9345	2.63845	3.65782	2.63845	5.9807	2.63845	13.0487
2.66913	1.58457	2.66913	0.8958	2.66913	0.83507	2.66913	0.90512	2.66913	3.4545	2.66913	6.17463	2.66913	13.1877
2.69981	1.35907	2.69981	0.81937	2.69981	1.01438	2.69981	0.95395	2.69981	3.21525	2.69981	6.29865	2.69981	13.163
2.73049	1.16027	2.73049	0.72981	2.73049	1.19631	2.73049	1.03766	2.73049	2.96002	2.73049	6.34862	2.73049	12.9749
2.76117	0.99365	2.76117	0.63224	2.76117	1.36439	2.76117	1.1184	2.76117	2.71163	2.76117	6.32253	2.76117	12.629
2.79185	0.86169	2.79185	0.53447	2.79185	1.51306	2.79185	1.17256	2.79185	2.49408	2.79185	6.2206	2.79185	12.1355
2.82252	0.76228	2.82252	0.44851	2.82252	1.64164	2.82252	1.18775	2.82252	2.32892	2.82252	6.04529	2.82252	11.5093
2.8532	0.68799	2.8532	0.39164	2.8532	1.75192	2.8532	1.15892	2.8532	2.22938	2.8532	5.80132	2.8532	10.7698
2.88388	0.62765	2.88388	0.38072	2.88388	1.84685	2.88388	1.08602	2.88388	2.19492	2.88388	5.49545	2.88388	9.93997
2.91456	0.56941	2.91456	0.41674	2.91456	1.92989	2.91456	0.97269	2.91456	2.21064	2.91456	5.13638	2.91456	9.04656
2.94524	0.5035	2.94524	0.4826	2.94524	2.00443	2.94524	0.82559	2.94524	2.25291	2.94524	4.73442	2.94524	8.11901
2.97592	0.42357	2.97592	0.55906	2.97592	2.07346	2.97592	0.6546	2.97592	2.29683	2.97592	4.30122	2.97592	7.18917
3.0066	0.32698	3.0066	0.63283	3.0066	2.13931	3.0066	0.47497	3.0066	2.3214	3.0066	3.84945	3.0066	6.29061
3.03728	0.2162	3.03728	0.69587	3.03728	2.20345	3.03728	0.31829	3.03728	2.3115	3.03728	3.39239	3.03728	5.45767
3.06796	0.11425	3.06796	0.74347	3.06796	2.26652	3.06796	0.26342	3.06796	2.25799	3.06796	2.94366	3.06796	4.72348
3.09864	0.14469	3.09864	0.77315	3.09864	2.32836	3.09864	0.3571	3.09864	2.15715	3.09864	2.5168	3.09864	4.11597
3.12932	0.28971	3.12932	0.78412	3.12932	2.38813	3.12932	0.50863	3.12932	2.01016	3.12932	2.1249	3.12932	3.65074
3.16	0.46038	3.16	0.77705	3.16	2.4445	3.16	0.65956	3.16	1.82268	3.16	1.77996	3.16	3.32269
3.19068	0.64009	3.19068	0.75403	3.19068	2.49576	3.19068	0.78926	3.19068	1.60512	3.19068	1.49178	3.19068	3.10251
3.22136	0.82221	3.22136	0.71854	3.22136	2.54	3.22136	0.88836	3.22136	1.37368	3.22136	1.26573	3.22136	2.94398
3.25204	1.00184	3.25204	0.67549	3.25204	2.57521	3.25204	0.95195	3.25204	1.1531	3.25204	1.09983	3.25204	2.79815
3.28272	1.17477	3.28272	0.63121	3.28272	2.59936	3.28272	0.97786	3.28272	0.98051	3.28272	0.98284	3.28272	2.62506
3.3134	1.33741	3.3134	0.59308	3.3134	2.61045	3.3134	0.96614	3.3134	0.90186	3.3134	0.89645	3.3134	2.39855
3.34408	1.48671	3.34408	0.5684	3.34408	2.60663	3.34408	0.91882	3.34408	0.94191	3.34408	0.82119	3.34408	2.10638
3.37476	1.62026	3.37476	0.56229	3.37476	2.58619	3.37476	0.83974	3.37476	1.07528	3.37476	0.74178	3.37476	1.7493
3.40544	1.73629	3.40544	0.57553	3.40544	2.54768	3.40544	0.7346	3.40544	1.2531	3.40544	0.64933	3.40544	1.34305
3.43612	1.83369	3.43612	0.60416	3.43612	2.48996	3.43612	0.61123	3.43612	1.43647	3.43612	0.54091	3.43612	0.93424
3.4668	1.912	3.4668	0.64143	3.4668	2.4123	3.4668	0.48078	3.4668	1.60117	3.4668	0.41842	3.4668	0.67501
3.49748	1.97132	3.49748	0.68013	3.49748	2.3145	3.49748	0.36162	3.49748	1.73282	3.49748	0.28811	3.49748	0.83052
3.52816	2.01225	3.52816	0.71405	3.52816	2.1969	3.52816	0.28772	3.52816	1.8231	3.52816	0.16452	3.52816	1.27933
3.55884	2.03581	3.55884	0.73848	3.55884	2.06058	3.55884	0.29703	3.55884	1.86779	3.55884	0.10614	3.55884	1.80822
3.58952	2.04328	3.58952	0.75021	3.58952	1.90737	3.58952	0.37341	3.58952	1.86573	3.58952	0.17778	3.58952	2.33985
3.62019	2.03614	3.62019	0.74737	3.62019	1.74003	3.62019	0.47105	3.62019	1.81821	3.62019	0.27719	3.62019	2.83999
3.65087	2.01585	3.65087	0.72928	3.65087	1.56236	3.65087	0.56313	3.65087	1.72853	3.65087	0.36193	3.65087	3.28719
3.68155	1.98383	3.68155	0.69627	3.68155	1.37941	3.68155	0.63719	3.68155	1.60163	3.68155	0.42081	3.68155	3.66613
3.71223	1.94131	3.71223	0.64962	3.71223	1.19787	3.71223	0.687	3.71223	1.44376	3.71223	0.44835	3.71223	3.96592
3.74291	1.88927	3.74291	0.59138	3.74291	1.02666	3.74291	0.70953	3.74291	1.26205	3.74291	0.44168	3.74291	4.17977
3.77359	1.82844	3.77359	0.52438	3.77359	0.87758	3.77359	0.70389	3.77359	1.06423	3.77359	0.40017	3.77359	4.3049
3.80427	1.7593	3.80427	0.45219	3.80427	0.76523	3.80427	0.67079	3.80427	0.85826	3.80427	0.32586	3.80427	4.34251
3.83495	1.68211	3.83495	0.37928	3.83495	0.70344	3.83495	0.61234	3.83495	0.65194	3.83495	0.22616	3.83495	4.29783
3.86563	1.59701	3.86563	0.31133	3.86563	0.69657	3.86563	0.53181	3.86563	0.45267	3.86563	0.13417	3.86563	4.17997
3.89631	1.5041	3.89631	0.25579	3.89631	0.73359	3.89631	0.4335	3.89631	0.26718	3.89631	0.17562	3.89631	4.00187
3.92699	1.40353	3.92699	0.22129	3.92699	0.79452	3.92699	0.32271	3.92699	0.10168	3.92699	0.33239	3.92699	3.78008
3.95767	1.29563	3.95767	0.21302	3.95767	0.86065	3.95767	0.20653	3.95767	0.04588	3.95767	0.51998	3.95767	3.53453
3.98835	1.18093	3.98835	0.22634	3.98835	0.9186	3.98835	0.10145	3.98835	0.15928	3.98835	0.71665	3.98835	3.28783
4.01903	1.06027	4.01903	0.25006	4.01903	0.95992	4.01903	0.09356	4.01903	0.24641	4.01903	0.91172	4.01903	3.06399
4.04971	0.93486	4.04971	0.27458	4.04971	0.9797	4.04971	0.18628	4.04971	0.30549	4.04971	1.09677	4.04971	2.88562
4.08039	0.80631	4.08039	0.29437	4.08039	0.97566	4.08039	0.28403	4.08039	0.33832	4.08039	1.26442	4.08039	2.76965
4.11107	0.67676	4.11107	0.30698	4.11107	0.9475	4.11107	0.36959	4.11107	0.34901	4.11107	1.40825	4.11107	2.7227
4.14175	0.54916	4.14175	0.31205	4.14175	0.89669	4.14175	0.43777	4.14175	0.34433	4.14175	1.52292	4.14175	2.7392
4.17243	0.42804	4.17243	0.31071	4.17243	0.82638	4.17243	0.4858	4.17243	0.33433	4.17243	1.60439	4.17243	2.80414
4.20311	0.3215	4.20311	0.30517	4.20311	0.74158	4.20311	0.51228	4.20311	0.33201	4.20311	1.64996	4.20311	2.89903
4.23379	0.24606	4.23379	0.29847	4.23379	0.64976	4.23379	0.51695	4.23379	0.34961	4.23379	1.65846	4.23379	3.0074
4.26447	0.22699	4.26447	0.29396	4.26447	0.56186	4.26447	0.50059	4.26447	0.39221	4.26447	1.63026	4.26447	3.11807
4.29515	0.26755	4.29515	0.29444	4.29515	0.49345	4.29515	0.46499	4.29515	0.45562	4.29515	1.56728	4.29515	3.22614
4.32583	0.33907	4.32583	0.3013	4.32583	0.4626	4.32583	0.41292	4.32583	0.53121	4.32583	1.47301	4.32583	3.33261
4.35651	0.41878	4.35651	0.31396	4.35651	0.47966	4.35651	0.34822	4.35651	0.61044	4.35651	1.35245	4.35651	3.44316
4.38719	0.49648	4.38719	0.33023	4.38719	0.53741	4.38719	0.27628	4.38719	0.68652	4.38719	1.21219	4.38719	3.56625
4.41786	0.56779	4.41786	0.34705	4.41786	0.61818	4.41786	0.20571	4.41786	0.75445	4.41786	1.06054	4.41786	3.71095
4.44854	0.63083	4.44854	0.3613	4.44854	0.70566	4.44854	0.15353	4.44854	0.81077	4.44854	0.90795	4.44854	3.88455
4.47922	0.68488	4.47922	0.37029	4.47922	0.78855	4.47922	0.14723	4.47922	0.85338	4.47922	0.76776	4.47922	4.09069
4.5099	0.72988	4.5099	0.37191	4.5099	0.8595	4.5099	0.1881	4.5099	0.88131	4.5099	0.65655	4.5099	4.32847
4.54058	0.76617	4.54058	0.36475	4.54058	0.91385	4.54058	0.247	4.54058	0.89463	4.54058	0.5915	4.54058	4.59252
4.57126	0.79431	4.57126	0.34803	4.57126	0.94877	4.57126	0.30536	4.57126	0.89426	4.57126	0.58059	4.57126	4.874
4.60194	0.815	4.60194	0.32162	4.60194	0.96286	4.60194	0.35507	4.60194	0.88177	4.60194	0.61372	4.60194	5.16195
4.63262	0.82892	4.63262	0.28593	4.63262	0.95585	4.63262	0.39223	4.63262	0.85916	4.63262	0.66949	4.63262	5.44461
4.6633	0.8367	4.6633	0.24198	4.6633	0.92844	4.6633	0.41481	4.6633	0.82865	4.6633	0.72828	4.6633	5.71051
4.69398	0.83885	4.69398	0.19135	4.69398	0.88214	4.69398	0.42203	4.69398	0.79232	4.69398	0.77704	4.69398	5.94922
4.72466	0.8357	4.72466	0.13652	4.72466	0.81917	4.72466	0.41396	4.72466	0.75192	4.72466	0.80836	4.72466	6.15186
4.75534	0.82744	4.75534	0.08277	4.75534	0.74231	4.75534	0.39146	4.75534	0.70861	4.75534	0.81869	4.75534	6.31135
4.78602	0.81411	4.78602	0.05193	4.78602	0.65482	4.78602	0.35602	4.78602	0.66288	4.78602	0.80713	4.78602	6.42251
4.8167	0.79567	4.8167	0.08145	4.8167	0.56038	4.8167	0.30963	4.8167	0.61449	4.8167	0.77467	4.8167	6.48201
4.84738	0.77202	4.84738	0.13451	4.84738	0.46312	4.84738	0.25467	4.84738	0.5627	4.84738	0.72368	4.84738	6.48824
4.87806	0.7431	4.87806	0.18861	4.87806	0.36796	4.87806	0.19377	4.87806	0.50646	4.87806	0.65759	4.87806	6.44111
4.90874	0.70891	4.90874	0.23846	4.90874	0.2817	4.90874	0.12971	4.90874	0.44473	4.90874	0.58065	4.90874	6.34172
4.93942	0.66956	4.93942	0.28172	4.93942	0.21548	4.93942	0.06525	4.93942	0.37678	4.93942	0.49774	4.93942	6.19216
4.9701	0.62533	4.9701	0.31695	4.9701	0.18642	4.9701	0.00304	4.9701	0.30248	4.9701	0.41451	4.9701	5.99516
5.00078	0.57665	5.00078	0.34323	5.00078	0.20282	5.00078	0.05454	5.00078	0.22267	5.00078	0.33777	5.00078	5.75382
5.03146	0.52412	5.03146	0.36011	5.03146	0.24872	5.03146	0.10538	5.03146	0.14032	5.03146	0.27638	5.03146	5.47149
5.06214	0.4685	5.06214	0.36757	5.06214	0.3055	5.06214	0.14781	5.06214	0.07039	5.06214	0.24139	5.06214	5.15157
5.09282	0.41065	5.09282	0.36598	5.09282	0.3641	5.09282	0.18058	5.09282	0.08659	5.09282	0.24075	5.09282	4.79756
5.1235	0.35153	5.1235	0.35613	5.1235	0.42132	5.1235	0.20297	5.1235	0.16693	5.1235	0.27095	5.1235	4.41319
5.15418	0.29213	5.15418	0.33914	5.15418	0.47648	5.15418	0.21472	5.15418	0.25433	5.15418	0.32141	5.15418	4.00275
5.18486	0.23346	5.18486	0.31647	5.18486	0.52983	5.18486	0.21606	5.18486	0.33847	5.18486	0.3842	5.18486	3.57168
5.21553	0.17645	5.21553	0.28986	5.21553	0.58185	5.21553	0.2077	5.21553	0.4152	5.21553	0.45588	5.21553	3.12763
5.24621	0.12199	5.24621	0.26132	5.24621	0.63281	5.24621	0.19076	5.24621	0.4815	5.24621	0.53534	5.24621	2.68235
5.27689	0.07103	5.27689	0.23305	5.27689	0.68256	5.27689	0.1668	5.27689	0.53496	5.27689	0.62203	5.27689	2.25533
5.30757	0.02634	5.30757	0.20735	5.30757	0.73044	5.30757	0.13788	5.30757	0.5737	5.30757	0.71499	5.30757	1.88046
5.33825	0.02809	5.33825	0.18633	5.33825	0.77538	5.33825	0.1069	5.33825	0.5964	5.33825	0.81247	5.33825	1.61447
5.36893	0.06562	5.36893	0.17145	5.36893	0.81597	5.36893	0.07884	5.36893	0.60237	5.36893	0.91192	5.36893	1.5287
5.39961	0.10162	5.39961	0.16292	5.39961	0.85065	5.39961	0.06362	5.39961	0.59159	5.39961	1.01015	5.39961	1.65447
5.43029	0.13454	5.43029	0.15948	5.43029	0.87786	5.43029	0.07117	5.43029	0.56469	5.43029	1.10361	5.43029	1.94503
5.46097	0.16455	5.46097	0.15888	5.46097	0.89623	5.46097	0.0945	5.46097	0.52303	5.46097	1.18862	5.46097	2.32661
5.49165	0.19203	5.49165	0.15878	5.49165	0.90463	5.49165	0.12221	5.49165	0.46866	5.49165	1.26166	5.49165	2.74385
5.52233	0.21738	5.52233	0.15733	5.52233	0.90231	5.52233	0.14884	5.52233	0.40442	5.52233	1.31952	5.52233	3.16198
5.55301	0.24095	5.55301	0.1534	5.55301	0.88897	5.55301	0.17205	5.55301	0.33414	5.55301	1.35953	5.55301	3.55845
5.58369	0.26293	5.58369	0.14655	5.58369	0.86476	5.58369	0.19074	5.58369	0.2634	5.58369	1.37969	5.58369	3.9175
5.61437	0.28335	5.61437	0.13696	5.61437	0.83028	5.61437	0.20442	5.61437	0.20137	5.61437	1.37872	5.61437	4.22737
5.64505	0.30208	5.64505	0.12534	5.64505	0.78661	5.64505	0.21296	5.64505	0.16411	5.64505	1.35616	5.64505	4.47915
5.67573	0.31887	5.67573	0.11291	5.67573	0.73523	5.67573	0.21651	5.67573	0.16763	5.67573	1.31238	5.67573	4.66622
5.70641	0.33335	5.70641	0.10137	5.70641	0.67801	5.70641	0.21531	5.70641	0.20403	5.70641	1.24856	5.70641	4.78405
5.73709	0.34514	5.73709	0.09275	5.73709	0.61714	5.73709	0.20973	5.73709	0.25213	5.73709	1.16665	5.73709	4.83012
5.76777	0.35388	5.76777	0.08878	5.76777	0.55504	5.76777	0.20015	5.76777	0.29851	5.76777	1.06929	5.76777	4.80389
5.79845	0.35928	5.79845	0.09	5.79845	0.49432	5.79845	0.18691	5.79845	0.33662	5.79845	0.95974	5.79845	4.70669
5.82913	0.36117	5.82913	0.0953	5.82913	0.4376	5.82913	0.17033	5.82913	0.36314	5.82913	0.84179	5.82913	4.54172
5.85981	0.35951	5.85981	0.10261	5.85981	0.38735	5.85981	0.15066	5.85981	0.3764	5.85981	0.71968	5.85981	4.31385
5.89049	0.35444	5.89049	0.10993	5.89049	0.34555	5.89049	0.12817	5.89049	0.37582	5.89049	0.59812	5.89049	4.02955
5.92117	0.34626	5.92117	0.11573	5.92117	0.31317	5.92117	0.1031	5.92117	0.36165	5.92117	0.48243	5.92117	3.69664
5.95185	0.33543	5.95185	0.11898	5.95185	0.28979	5.95185	0.07583	5.95185	0.3349	5.95185	0.37892	5.95185	3.32411
5.98253	0.32256	5.98253	0.11913	5.98253	0.27352	5.98253	0.04707	5.98253	0.29732	5.98253	0.2956	5.98253	2.92194
6.0132	0.30836	6.0132	0.11592	6.0132	0.26152	6.0132	0.01994	6.0132	0.25155	6.0132	0.24188	6.0132	2.50088
6.04388	0.2936	6.04388	0.10941	6.04388	0.25084	6.04388	0.0237	6.04388	0.20163	6.04388	0.2229	6.04388	2.07252
6.07456	0.27904	6.07456	0.09985	6.07456	0.23909	6.07456	0.05304	6.07456	0.15465	6.07456	0.23052	6.07456	1.64953
6.10524	0.26538	6.10524	0.08765	6.10524	0.22483	6.10524	0.08394	6.10524	0.12437	6.10524	0.24836	6.10524	1.24713
6.13592	0.25313	6.13592	0.07338	6.13592	0.20766	6.13592	0.11366	6.13592	0.1282	6.13592	0.26373	6.13592	0.88771
6.1666	0.24258	6.1666	0.05768	6.1666	0.18828	6.1666	0.1409	6.1666	0.16294	6.1666	0.27011	6.1666	0.61573
6.19728	0.23376	6.19728	0.04127	6.19728	0.16865	6.19728	0.16459	6.19728	0.21032	6.19728	0.26503	6.19728	0.51625
6.22796	0.22645	6.22796	0.02502	6.22796	0.15222	6.22796	0.18374	6.22796	0.25865	6.22796	0.24844	6.22796	0.61186
6.25864	0.22027	6.25864	0.01086	6.25864	0.14382	6.25864	0.19749	6.25864	0.30223	6.25864	0.22197	6.25864	0.78871
6.28932	0.21475	6.28932	0.01101	6.28932	0.14782	6.28932	0.20517	6.28932	0.33795	6.28932	0.18891	6.28932	0.96555
6.32	0.20944	6.32	0.02273	6.32	0.16517	6.32	0.2063	6.32	0.36399	6.32	0.15508	6.32	1.11265
6.35068	0.20403	6.35068	0.03396	6.35068	0.19306	6.35068	0.20071	6.35068	0.3793	6.35068	0.13072	6.35068	1.21945
6.38136	0.19837	6.38136	0.0433	6.38136	0.22766	6.38136	0.1885	6.38136	0.38347	6.38136	0.12925	6.38136	1.28264
6.41204	0.19244	6.41204	0.05048	6.41204	0.26596	6.41204	0.17018	6.41204	0.37657	6.41204	0.15393	6.41204	1.30233
6.44272	0.18642	6.44272	0.05549	6.44272	0.30601	6.44272	0.14674	6.44272	0.35914	6.44272	0.19407	6.44272	1.28068
6.4734	0.18054	6.4734	0.05852	6.4734	0.34661	6.4734	0.11997	6.4734	0.3321	6.4734	0.23911	6.4734	1.22123
6.50408	0.17509	6.50408	0.05988	6.50408	0.38714	6.50408	0.09333	6.50408	0.29671	6.50408	0.28288	6.50408	1.1285
6.53476	0.1703	6.53476	0.06001	6.53476	0.42732	6.53476	0.07415	6.53476	0.25449	6.53476	0.3219	6.53476	1.00765
6.56544	0.16629	6.56544	0.05941	6.56544	0.46707	6.56544	0.07386	6.56544	0.20714	6.56544	0.35409	6.56544	0.86424
6.59612	0.16305	6.59612	0.05862	6.59612	0.50648	6.59612	0.09405	6.59612	0.15651	6.59612	0.37826	6.59612	0.70398
6.6268	0.16042	6.6268	0.05809	6.6268	0.54566	6.6268	0.12428	6.6268	0.10453	6.6268	0.39384	6.6268	0.53255
6.65748	0.1582	6.65748	0.05811	6.65748	0.58469	6.65748	0.15668	6.65748	0.05334	6.65748	0.40076	6.65748	0.3555
6.68816	0.15623	6.68816	0.05875	6.68816	0.62358	6.68816	0.18727	6.68816	0.01209	6.68816	0.39935	6.68816	0.17873
6.71884	0.15448	6.71884	0.05987	6.71884	0.66226	6.71884	0.21373	6.71884	0.04537	6.71884	0.39025	6.71884	0.03705
6.74952	0.15316	6.74952	0.06119	6.74952	0.70052	6.74952	0.23453	6.74952	0.08559	6.74952	0.37429	6.74952	0.17282
6.7802	0.1528	6.7802	0.06237	6.7802	0.73804	6.7802	0.24862	6.7802	0.12008	6.7802	0.35244	6.7802	0.3291
6.81087	0.15419	6.81087	0.06316	6.81087	0.77443	6.81087	0.25536	6.81087	0.14757	6.81087	0.3257	6.81087	0.47432
6.84155	0.15829	6.84155	0.06336	6.84155	0.80923	6.84155	0.25449	6.84155	0.16739	6.84155	0.29502	6.84155	0.60595
6.87223	0.16597	6.87223	0.06291	6.87223	0.84191	6.87223	0.24609	6.87223	0.17918	6.87223	0.26121	6.87223	0.72292
6.90291	0.17773	6.90291	0.06185	6.90291	0.87197	6.90291	0.23068	6.90291	0.1829	6.90291	0.22496	6.90291	0.82487
6.93359	0.19353	6.93359	0.06031	6.93359	0.89888	6.93359	0.20914	6.93359	0.17878	6.93359	0.18679	6.93359	0.91195
6.96427	0.21283	6.96427	0.05846	6.96427	0.92214	6.96427	0.18289	6.96427	0.1673	6.96427	0.14717	6.96427	0.98473
6.99495	0.23474	6.99495	0.05647	6.99495	0.9413	6.99495	0.15405	6.99495	0.14916	6.99495	0.1068	6.99495	1.04401
7.02563	0.25817	7.02563	0.05448	7.02563	0.95592	7.02563	0.1259	7.02563	0.12527	7.02563	0.06766	7.02563	1.09077
7.05631	0.28201	7.05631	0.05254	7.05631	0.96563	7.05631	0.10388	7.05631	0.09677	7.05631	0.04016	7.05631	1.12598
7.08699	0.30516	7.08699	0.05059	7.08699	0.97009	7.08699	0.0954	7.08699	0.06529	7.08699	0.05394	7.08699	1.15064
7.11767	0.3266	7.11767	0.04844	7.11767	0.96904	7.11767	0.10412	7.11767	0.03461	7.11767	0.09367	7.11767	1.16563
7.14835	0.34542	7.14835	0.0459	7.14835	0.96227	7.14835	0.12483	7.14835	0.02688	7.14835	0.13905	7.14835	1.17178
7.17903	0.36084	7.17903	0.04272	7.17903	0.94963	7.17903	0.14996	7.17903	0.05537	7.17903	0.1856	7.17903	1.16985
7.20971	0.37221	7.20971	0.03875	7.20971	0.93107	7.20971	0.1745	7.20971	0.09016	7.20971	0.23157	7.20971	1.16057
7.24039	0.37904	7.24039	0.03396	7.24039	0.90661	7.24039	0.1956	7.24039	0.12454	7.24039	0.27563	7.24039	1.14472
7.27107	0.38099	7.27107	0.02858	7.27107	0.87637	7.27107	0.2116	7.27107	0.15675	7.27107	0.3166	7.27107	1.12317
7.30175	0.37791	7.30175	0.02337	7.30175	0.8406	7.30175	0.22159	7.30175	0.18577	7.30175	0.35331	7.30175	1.09696
7.33243	0.36977	7.33243	0.02013	7.33243	0.79963	7.33243	0.22516	7.33243	0.21084	7.33243	0.38468	7.33243	1.0673
7.36311	0.35673	7.36311	0.02139	7.36311	0.75392	7.36311	0.22232	7.36311	0.23144	7.36311	0.40975	7.36311	1.03564
7.39379	0.33908	7.39379	0.0275	7.39379	0.70405	7.39379	0.21349	7.39379	0.24718	7.39379	0.42774	7.39379	1.00366
7.42447	0.31725	7.42447	0.03648	7.42447	0.65069	7.42447	0.19946	7.42447	0.25788	7.42447	0.43804	7.42447	0.97322
7.45515	0.29177	7.45515	0.04669	7.45515	0.59459	7.45515	0.18146	7.45515	0.26349	7.45515	0.44032	7.45515	0.94631
7.48583	0.26329	7.48583	0.05715	7.48583	0.53662	7.48583	0.16115	7.48583	0.26416	7.48583	0.43447	7.48583	0.92496
7.51651	0.2325	7.51651	0.0672	7.51651	0.47765	7.51651	0.14085	7.51651	0.26019	7.51651	0.42068	7.51651	0.91101
7.54719	0.20016	7.54719	0.07636	7.54719	0.41863	7.54719	0.12359	7.54719	0.25207	7.54719	0.39938	7.54719	0.90597
7.57787	0.16705	7.57787	0.08419	7.57787	0.36047	7.57787	0.11285	7.57787	0.24045	7.57787	0.37127	7.57787	0.91078
7.60854	0.13397	7.60854	0.09038	7.60854	0.30412	7.60854	0.11115	7.60854	0.22618	7.60854	0.33729	7.60854	0.92572
7.63922	0.10174	7.63922	0.09465	7.63922	0.2505	7.63922	0.11806	7.63922	0.21031	7.63922	0.29855	7.63922	0.9503
7.6699	0.07131	7.6699	0.09683	7.6699	0.20055	7.6699	0.13042	7.6699	0.19406	7.6699	0.25638	7.6699	0.98339
7.70058	0.04419	7.70058	0.09682	7.70058	0.1554	7.70058	0.14461	7.70058	0.17885	7.70058	0.21226	7.70058	1.02329
7.73126	0.02517	7.73126	0.0946	7.73126	0.1166	7.73126	0.15779	7.73126	0.16616	7.73126	0.16786	7.73126	1.06789
7.76194	0.02704	7.76194	0.09024	7.76194	0.08698	7.76194	0.16812	7.76194	0.15729	7.76194	0.12522	7.76194	1.11486
7.79262	0.04266	7.79262	0.08389	7.79262	0.07127	7.79262	0.17447	7.79262	0.15297	7.79262	0.0874	7.79262	1.16166
7.8233	0.05907	7.8233	0.07576	7.8233	0.07243	7.8233	0.17625	7.8233	0.15307	7.8233	0.06049	7.8233	1.20571
7.85398	0.07334	7.85398	0.06615	7.85398	0.08553	7.85398	0.17328	7.85398	0.15655	7.85398	0.05466	7.85398	1.24436
7.88466	0.08484	7.88466	0.05538	7.88466	0.10342	7.88466	0.16573	7.88466	0.16189	7.88466	0.06811	7.88466	1.27504
7.91534	0.09351	7.91534	0.04385	7.91534	0.12224	7.91534	0.15407	7.91534	0.16746	7.91534	0.08687	7.91534	1.29526
7.94602	0.09949	7.94602	0.03202	7.94602	0.14051	7.94602	0.13903	7.94602	0.17188	7.94602	0.10347	7.94602	1.30271
7.9767	0.10305	7.9767	0.02054	7.9767	0.15771	7.9767	0.12167	7.9767	0.17408	7.9767	0.11532	7.9767	1.29531
8.00738	0.10454	8.00738	0.01106	8.00738	0.17362	8.00738	0.10345	8.00738	0.17331	8.00738	0.12149	8.00738	1.27135
8.03806	0.10434	8.03806	0.01005	8.03806	0.1881	8.03806	0.0864	8.03806	0.16911	8.03806	0.1218	8.03806	1.2295
8.06874	0.1029	8.06874	0.01743	8.06874	0.20096	8.06874	0.07341	8.06874	0.1613	8.06874	0.11644	8.06874	1.16895
8.09942	0.10062	8.09942	0.02563	8.09942	0.21194	8.09942	0.06776	8.09942	0.1499	8.09942	0.10591	8.09942	1.08947
8.1301	0.09791	8.1301	0.03285	8.1301	0.22071	8.1301	0.07078	8.1301	0.13515	8.1301	0.09096	8.1301	0.99152
8.16078	0.09513	8.16078	0.03862	8.16078	0.22691	8.16078	0.08018	8.16078	0.11742	8.16078	0.07266	8.16078	0.87639
8.19146	0.09257	8.19146	0.04276	8.19146	0.2302	8.19146	0.09232	8.19146	0.09724	8.19146	0.05272	8.19146	0.74648
8.22214	0.09043	8.22214	0.04522	8.22214	0.23025	8.22214	0.10444	8.22214	0.07529	8.22214	0.03521	8.22214	0.60602
8.25282	0.08882	8.25282	0.04602	8.25282	0.22683	8.25282	0.11492	8.25282	0.05238	8.25282	0.03129	8.25282	0.46311
8.2835	0.08775	8.2835	0.04526	8.2835	0.2198	8.2835	0.12283	8.2835	0.02979	8.2835	0.04626	8.2835	0.33682
8.31418	0.08715	8.31418	0.04313	8.31418	0.20913	8.31418	0.12773	8.31418	0.01308	8.31418	0.06842	8.31418	0.27483
8.34486	0.08689	8.34486	0.03985	8.34486	0.19494	8.34486	0.12946	8.34486	0.02299	8.34486	0.09163	8.34486	0.328
8.37554	0.08681	8.37554	0.03575	8.37554	0.17745	8.37554	0.12809	8.37554	0.04207	8.37554	0.11379	8.37554	0.45949
8.40621	0.08672	8.40621	0.03125	8.40621	0.157	8.40621	0.12386	8.40621	0.06012	8.40621	0.13387	8.40621	0.61803
8.43689	0.08646	8.43689	0.0269	8.43689	0.13407	8.43689	0.11713	8.43689	0.07568	8.43689	0.15127	8.43689	0.78118
8.46757	0.08585	8.46757	0.02342	8.46757	0.10919	8.46757	0.10837	8.46757	0.08818	8.46757	0.16558	8.46757	0.93876
8.49825	0.08474	8.49825	0.0216	8.49825	0.08301	8.49825	0.09813	8.49825	0.09726	8.49825	0.1766	8.49825	1.0847
8.52893	0.08302	8.52893	0.02187	8.52893	0.05622	8.52893	0.08699	8.52893	0.10275	8.52893	0.18423	8.52893	1.21474
8.55961	0.0806	8.55961	0.02386	8.55961	0.02966	8.55961	0.07557	8.55961	0.10463	8.55961	0.18855	8.55961	1.32565
8.59029	0.07743	8.59029	0.02675	8.59029	0.00682	8.59029	0.06452	8.59029	0.10299	8.59029	0.1897	8.59029	1.41501
8.62097	0.07353	8.62097	0.02976	8.62097	0.02281	8.62097	0.05447	8.62097	0.09809	8.62097	0.18793	8.62097	1.48116
8.65165	0.06903	8.65165	0.03232	8.65165	0.04517	8.65165	0.04603	8.65165	0.09028	8.65165	0.18355	8.65165	1.52318
8.68233	0.06412	8.68233	0.03409	8.68233	0.0653	8.68233	0.0397	8.68233	0.08003	8.68233	0.17689	8.68233	1.54083
8.71301	0.05919	8.71301	0.03484	8.71301	0.0825	8.71301	0.03569	8.71301	0.06788	8.71301	0.16833	8.71301	1.53458
8.74369	0.05481	8.74369	0.03445	8.74369	0.09637	8.74369	0.03372	8.74369	0.05447	8.74369	0.15822	8.74369	1.50556
8.77437	0.05173	8.77437	0.03284	8.77437	0.10666	8.77437	0.03308	8.77437	0.04056	8.77437	0.14691	8.77437	1.4555
8.80505	0.05077	8.80505	0.03001	8.80505	0.1132	8.80505	0.033	8.80505	0.02724	8.80505	0.1347	8.80505	1.38665
8.83573	0.05247	8.83573	0.026	8.83573	0.11599	8.83573	0.03288	8.83573	0.01689	8.83573	0.12182	8.83573	1.30171
8.86641	0.0568	8.86641	0.0209	8.86641	0.11509	8.86641	0.03236	8.86641	0.0154	8.86641	0.10848	8.86641	1.2037
8.89709	0.06324	8.89709	0.01481	8.89709	0.1107	8.89709	0.03132	8.89709	0.02252	8.89709	0.09479	8.89709	1.0959
8.92777	0.07102	8.92777	0.00796	8.92777	0.10311	8.92777	0.02976	8.92777	0.03119	8.92777	0.08085	8.92777	0.98163
8.95845	0.07941	8.95845	0.00186	8.95845	0.09267	8.95845	0.02778	8.95845	0.03878	8.95845	0.06669	8.95845	0.86422
8.98913	0.0878	8.98913	0.00819	8.98913	0.0798	8.98913	0.02549	8.98913	0.04452	8.98913	0.05232	8.98913	0.74682
9.01981	0.09569	9.01981	0.01642	9.01981	0.065	9.01981	0.02302	9.01981	0.04821	9.01981	0.03777	9.01981	0.63229
9.05049	0.10268	9.05049	0.02476	9.05049	0.04875	9.05049	0.02049	9.05049	0.04986	9.05049	0.02315	9.05049	0.52309
9.08117	0.10846	9.08117	0.03291	9.08117	0.03159	9.08117	0.01801	9.08117	0.04972	9.08117	0.00951	9.08117	0.42121
9.11185	0.1128	9.11185	0.04063	9.11185	0.01407	9.11185	0.01571	9.11185	0.04821	9.11185	0.01072	9.11185	0.32816
9.14253	0.11552	9.14253	0.0477	9.14253	0.0042	9.14253	0.01382	9.14253	0.04598	9.14253	0.02513	9.14253	0.24515
9.17321	0.11652	9.17321	0.05392	9.17321	0.02077	9.17321	0.01272	9.17321	0.04386	9.17321	0.04068	9.17321	0.17382
9.20388	0.11577	9.20388	0.0591	9.20388	0.03683	9.20388	0.01285	9.20388	0.0428	9.20388	0.05646	9.20388	0.11871
9.23456	0.11327	9.23456	0.06309	9.23456	0.05166	9.23456	0.01442	9.23456	0.04351	9.23456	0.07223	9.23456	0.09302
9.26524	0.10909	9.26524	0.06579	9.26524	0.06493	9.26524	0.0172	9.26524	0.04621	9.26524	0.08782	9.26524	0.10865
9.29592	0.10336	9.29592	0.06714	9.29592	0.07644	9.29592	0.0208	9.29592	0.05046	9.29592	0.10306	9.29592	0.14947
9.3266	0.09626	9.3266	0.0671	9.3266	0.08604	9.3266	0.02483	9.3266	0.0555	9.3266	0.11781	9.3266	0.19917
9.35728	0.08798	9.35728	0.06574	9.35728	0.09364	9.35728	0.029	9.35728	0.06053	9.35728	0.13192	9.35728	0.2518
9.38796	0.0788	9.38796	0.06316	9.38796	0.09921	9.38796	0.03304	9.38796	0.06487	9.38796	0.14526	9.38796	0.30496
9.41864	0.06902	9.41864	0.05955	9.41864	0.1028	9.41864	0.03674	9.41864	0.068	9.41864	0.15771	9.41864	0.35692
9.44932	0.05902	9.44932	0.05518	9.44932	0.10447	9.44932	0.0399	9.44932	0.06955	9.44932	0.1692	9.44932	0.40596
9.48	0.04925	9.48	0.05045	9.48	0.10437	9.48	0.04238	9.48	0.06928	9.48	0.17966	9.48	0.45023
9.51068	0.04038	9.51068	0.04588	9.51068	0.10262	9.51068	0.04404	9.51068	0.06706	9.51068	0.18906	9.51068	0.48786
9.54136	0.03334	9.54136	0.04214	9.54136	0.09941	9.54136	0.0448	9.54136	0.06289	9.54136	0.19742	9.54136	0.51701
9.57204	0.02937	9.57204	0.03994	9.57204	0.09492	9.57204	0.04463	9.57204	0.05683	9.57204	0.20475	9.57204	0.53606
9.60272	0.02928	9.60272	0.03979	9.60272	0.08936	9.60272	0.04354	9.60272	0.04904	9.60272	0.21114	9.60272	0.54364
9.6334	0.03249	9.6334	0.04169	9.6334	0.08297	9.6334	0.0416	9.6334	0.03978	9.6334	0.21665	9.6334	0.53878
9.66408	0.03751	9.66408	0.04517	9.66408	0.07598	9.66408	0.03893	9.66408	0.02932	9.66408	0.22138	9.66408	0.52089
9.69476	0.04308	9.69476	0.04952	9.69476	0.06873	9.69476	0.03573	9.69476	0.01802	9.69476	0.22544	9.69476	0.48986
9.72544	0.04848	9.72544	0.05406	9.72544	0.06163	9.72544	0.03229	9.72544	0.00625	9.72544	0.22893	9.72544	0.44604
9.75612	0.0533	9.75612	0.05825	9.75612	0.05525	9.75612	0.02901	9.75612	0.00576	9.75612	0.23194	9.75612	0.39023
9.7868	0.05735	9.7868	0.0617	9.7868	0.05036	9.7868	0.02642	9.7868	0.01736	9.7868	0.23452	9.7868	0.32367
9.81748	0.06056	9.81748	0.06414	9.81748	0.04788	9.81748	0.02508	9.81748	0.02834	9.81748	0.23671	9.81748	0.24799
9.84816	0.06295	9.84816	0.06537	9.84816	0.04852	9.84816	0.02537	9.84816	0.03836	9.84816	0.23852	9.84816	0.16523
9.87884	0.06459	9.87884	0.06531	9.87884	0.0524	9.87884	0.02725	9.87884	0.0471	9.87884	0.23989	9.87884	0.07824
9.90952	0.06565	9.90952	0.06393	9.90952	0.05896	9.90952	0.03028	9.90952	0.05432	9.90952	0.24077	9.90952	0.02485
9.9402	0.06631	9.9402	0.06126	9.9402	0.06743	9.9402	0.03392	9.9402	0.05982	9.9402	0.24105	9.9402	0.10879
9.97088	0.0668	9.97088	0.0574	9.97088	0.07706	9.97088	0.0377	9.97088	0.06348	9.97088	0.24062	9.97088	0.19777

[truncated: 60 more sheets: Fig. 3e, Fig. 3f, Fig. 3g , Fig. 3h, Fig. 3i, Fig. 4a, Fig. 4d, Fig. 5a, Fig. 5b, Fig. 5c, Fig. 5e, Fig. 5f, Fig. 5g, Fig. 5h, Fig. 6b, Fig. 6c, Fig. 6e, Fig. 6f , Fig. 6g, Fig. 6h …]
